1  
2  
3  
4  
5  
6  
7  
8  
9  
10  
11  
12  
13  
14  
15  
16  
17  
18  
19  
20  
21

### Direct reprogramming of human epithelial cells into organoids by miR-106a-3p

Delom F.<sup>1\*</sup>, Puceat M.<sup>2</sup>, and Fessart D.<sup>1\*</sup>

1 Univ. Bordeaux, F-33000 Bordeaux, France.

2 Université Aix-Marseille, INSERM UMR\_1251, F-13385 Marseille, France.

**\* Corresponding author:**

Delphine Fessart - Bordeaux University - 146, Léo-Saignat – 33076 Bordeaux – France. Phone: (00 33) +5 56 33 04 31. Fax: (00 33) +5 56 33 33 30. E-mail: [delphine.fessart@yahoo.fr](mailto:delphine.fessart@yahoo.fr)

Frederic Delom - Bordeaux University - 146, Léo-Saignat – 33076 Bordeaux – France. Phone: (00 33) +5 56330431. Fax: (00 33) +5 56333330. E-mail: [frederic.delom@yahoo.fr](mailto:frederic.delom@yahoo.fr)

**Lead contact:** Delphine Fessart, [delphine.fessart@yahoo.fr](mailto:delphine.fessart@yahoo.fr)

22 **Abstract**

23 Organoids development relies on the self-organizing properties of adult stem cells to create structures  
24 which recapitulate the architecture, functionality, and genetic signature observed in original tissues.  
25 Little is known about of the exact nature of the intrinsic cell properties at the origin of organoid  
26 generation, and of the signaling pathways governing their differentiation. Herein, we carried out a  
27 functional microRNA screen to identify miRNAs at the origin of organoid generation from human  
28 epithelial cell culture. We uncover miR-106a-3p that initiates and promotes organoids. This miRNA  
29 acts as a master inducer of the expression of the three core pluripotency transcription factors  
30 (NANOG, OCT4 and SOX2) through the regulation of a set of 10 genes, and thus strengthening the  
31 reprogramming and cell differentiation of human epithelial cells into organoids. These data  
32 demonstrate that organoids can be directly generated from human epithelial cells by only one miRNA:  
33 miR-106a-3p. Hence, we appear to have identified a new determinant of organoid identity, which  
34 plays a role in reprogramming, cell differentiation and tissue engineering.

35

## 36 **Introduction**

37 Three-dimensional (3D) human organoid culture models are appealing tools to study  
38 pathophysiological processes. These models have been described, by us and others, for the  
39 lung <sup>5,6</sup> as well as for numerous other tissues <sup>19</sup>. The term "organoid" literally means organ-  
40 like, reflecting the ability of organoid culture conditions to prompt cells to self-organize into  
41 structures mimicking the architecture of the organ from which they were derived. In contrast  
42 to organ explants, organoids can arise from a single primary cell <sup>5,6,28</sup>, thereby allowing the  
43 generation of human organoids from biopsies <sup>5</sup>. Non-tumor organoids are thought to arise  
44 from adult stem cells (aSCs), and therefore should in theory be capable of self-renewal and  
45 differentiation. Consistent with this idea, primary cells enriched with known progenitor/stem  
46 cell markers are more efficient at forming organoids than the general cell population <sup>13</sup>.  
47 However, currently there is a lack of understanding of the underlying epigenetic and genetic  
48 mechanisms that control organoid-initiating frequency, self-renewal and differentiation during  
49 organogenesis.

50 To better understand mammalian development, as well as to exploit the tremendous  
51 therapeutic potential of organoid models, it is necessary to identify and characterize the  
52 genetic mechanisms governing the fate of aSCs. MicroRNAs (miRNA) have been recently  
53 shown to play an important role in regulating stem cell self-renewal and differentiation <sup>15</sup>. In  
54 general, one gene can be repressed by multiple miRNAs and one miRNA may repress  
55 multiple target genes, which results in the formation of complex regulatory networks. In a  
56 wide variety of developmental processes, miRNAs finely tune or restrict cellular identities by  
57 targeting important transcription factors or key pathways <sup>20</sup>. Hence, we sought to investigate  
58 the contribution of miRNA-mediated gene regulation in the enrichment of progenitor/stem  
59 cell markers. This would allow us to better characterize the mechanisms responsible for  
60 controlling the initiating cell sub-population and thus improving tissue-specific organoid  
61 growth conditions. Consequently, we performed a miRNA screen in human primary epithelial  
62 cells to identify the mediators influencing the initiation of stem cell derived organoids. We  
63 identified a previously uncharacterized miRNA, miR-106a-3p, and its target genes that play a  
64 key role in such process. Using a gain of function approach, we discovered that the  
65 endogenous levels of three core transcription factors (OCT4, SOX2 and NANOG) were post-  
66 transcriptionally controlled by miR-106a-3p in human aSCs. Moreover, we discovered that  
67 miR-106a-3p is necessary and sufficient to fine tune the differentiation process, and thus the  
68 pluripotent state through a specific transcriptional regulatory network. Overall, our results

69 highlight the importance of miR-106a-3p in the initiation of stem-cell derived organoids and  
70 provide some clues about the mechanism underlying organogenesis.

71

## 72 **Results**

### 73 *Organoid culture of Human Epithelial Cells exhibits a CD44<sup>high</sup>/CD24<sup>low</sup> phenotype*

74 This study was initiated to identify organoid-initiating epithelial cell subpopulations  
75 that specify stem/progenitor cell functions in epithelial cells<sup>13</sup>. One of the main  
76 characteristics of stem cell is to be rare immortal cells within a mass culture that can both self-  
77 renew by dividing and give rise to many cell types. First, we characterized the properties of  
78 human primary mammary epithelial cells (HMEC) grown in 3D compared to conventional 2D  
79 culture. As a control, cells were grown under organoid culture conditions as we previously  
80 described<sup>5</sup> and the cell lines tested formed 3D-structured human organoids (Figure 1A).  
81 Approximately 3% of cells present in the culture featured the capacity to reconstitute an  
82 organoid (Figure 1A), suggesting the presence of stem cells within the mass culture. Next, the  
83 self-renewal capacity of organoid-initiating cells was assessed by serial organoid formation  
84 from passage 5 to passage 11 (Figure 1B). Cells progressively lost self-renewal ability to form  
85 organoids upon serial propagation (Figure 1B), consistent with previously described loss of  
86 self-renewal potential of primary epithelial stem cells after few passages<sup>14</sup>.

87 Previous studies have reported that human mammary epithelial cells with  
88 CD44<sup>high</sup>/CD24<sup>low</sup> phenotype have the highest progenitor ability compared to all other  
89 stem/progenitor subpopulations<sup>7</sup>. Therefore, we analyzed the expression of CD44 and CD24  
90 in 2D cell culture compared to 3D using flow cytometry (Figure 1C). In 2D cell culture, 85%  
91 expressed both CD24 and CD44 at high levels and 14% expressed CD24 at low levels  
92 together with high levels of CD44 (Figure 1C, Top panel). In contrast, 3D cell culture showed  
93 more than 3-fold increase in CD44<sup>high</sup>/CD24<sup>low</sup> phenotype cells (~49%) compared to 2D  
94 (~14%) (Figure 1C; lower panel, p=0.0268, n=3). We then analyzed the cells from 2D culture  
95 using standard immunofluorescence (Figure 1D) to determine the expression of CD24 and  
96 CD44 cell-surface markers. The overlaid images showed a mix of cell populations: CD24  
97 cells (green), CD44 cells (red) and CD44/CD24 co-expressing cells (yellow) (Figure 1D).  
98 Together, these results indicate that cells grown as organoids acquired a CD44<sup>high</sup>/CD24<sup>low</sup>  
99 expression pattern similar to stem/progenitor cell that can be used for further screening.

100

### 101 *A miRNA screening approach to selectively favor organoids formation*

102 To investigate whether miRNA-mediated gene regulation could promote organoid  
103 formation, we monitored, as a tool, the expression of CD44 and CD24 following miRNA  
104 transfection into HMEC cells (Figure 2A-D). Following quantitative image analysis of  
105 >100,000 cells at Passage 6 (P6), frequency distributions of CD44 intensity were compared in  
106 mass culture (whole population), and mass culture exposed to CD44 siRNA (Figure 2A) or  
107 exposed to CD24 siRNA (Figure 2B). CD44 and CD24 levels were lower in siRNA-depleted  
108 cells in comparison to the whole population, which validates the specificity of our assay  
109 (Figure 2A-B). To identify miRNAs that play a role in the enrichment of CD44<sup>high</sup>/CD24<sup>low</sup>  
110 cell phenotype, we performed an unbiased functional screen for miRNAs that modulate  
111 CD44/CD24 phenotypes in HMEC (Figure 2C). Using an approach similar to our genome-  
112 wide small interfering RNA (siRNA) screen for p16 modulators <sup>2</sup>, we transfected actively  
113 proliferating cells (Passage 6, P6) with 837 miRNAs. siRNA targeting siGLO (‘cyclophilin  
114 B’; PPIB), CD44 or CD24 served as controls. We assigned cut-off values to define miRNA  
115 hits based on CD44 and CD24 cell density. The raw screening data and quantitation of each  
116 phenotypic criterion are shown in Figure 2D. This strategy revealed that the miR-106a-3p  
117 shifts primary cells into a CD44<sup>high</sup>/CD24<sup>low</sup> phenotype. This miRNA is a paralogue of the  
118 miR-17/92 cluster (Figure 2E). Next, to further confirm the results, we performed a secondary  
119 screen of the whole family cluster (Figure 2E). Twenty-eight miRNAs belonging to the  
120 cluster were retested, in triplicate, using the same method as in the primary screen (Figure  
121 1C). A total of 4 hits were scored as those miRNAs with Z-factor >2 (Figure 2F) and  
122 prompted a shift in the CD44<sup>high</sup>/CD24<sup>low</sup> population (Figure S1B). The top hit was miR-  
123 106a-3p (Figure 2F and Figure S1A). We then confirmed miR-106a-3p induced a  
124 CD44<sup>high</sup>/CD24<sup>low</sup> phenotype using flow cytometry based on the expression of CD44 and  
125 CD24 (Figure S1B and Figure 2G). In cells expressing the control mimic, the  
126 CD44<sup>high</sup>/CD24<sup>low</sup> population (CD24<sup>-</sup>/CD44<sup>+</sup>) was ~10% of the total cell population  
127 (Figure 2G). Conversely, we observed a 5-fold increase of CD44<sup>high</sup>/CD24<sup>low</sup> population,  
128 ~50% of the total cell population, in cells transfected with a mimic miR106a-3p (Figure 2G).

129 In parallel, to correlate these data with organoid development, we assessed the  
130 organoid-initiating frequency of each of the 28 miRNAs (miR-17/92 cluster) (Figure 2E). Out  
131 of the total of 7 positive hits (Figure 2H), miR-106a-3p displayed the highest organoid-  
132 initiating frequency (Figure 2H). Taken together, these results show that miR-106a-3p (Figure  
133 2I), is the only miRNA that exhibits the two properties of 1) enriching CD44<sup>high</sup>/CD24<sup>low</sup>  
134 cells and 2) favoring organoid development.

135 ***The development of human organoids is driven by miR-106a-3p.***

136 Next, we questioned whether miR-106a-3p is endogenously expressed in organoids  
137 compared to 2D culture. We found that only the 3D culture of organoids expressed miR-106a-  
138 3p, thus reinforcing its potential role in organoid formation (Figure 3A). To further study  
139 miR-106a-3p function, we generated retroviral vectors of miR-106a as previously described<sup>24</sup>  
140 evaluated its stable expression in HMECs (Figure 3B-E). First, we examined the expression of  
141 miR-106a-5p and miR-106a-3p using RT-qPCR in control (miR-Vector) and miR-106a-  
142 infected cells (Figure 3B) and observed that miR-106a-5p was expressed in both conditions.  
143 On the contrary, both RT-qPCR and *in situ* hybridization showed that miR-106a-3p was  
144 exclusively expressed in miR-106a cells (Figure 3B-C) at levels similar to those observed in  
145 3D cultures (Figure 3A).

146 As expected, miR-106a stable overexpression greatly increased organoid-initiating  
147 frequency (Figure 3D). To further evaluate the impact of miR-106a on organoid architecture,  
148 organoids were analyzed using confocal microscopy. Apoptotic cells are present in organoids  
149 during lumen development<sup>4</sup>. Immunofluorescence staining for the apoptosis marker,  
150 Caspase-3, demonstrated that miR-106a did not impact on luminal apoptosis during  
151 organogenesis (Figure 3E, Caspase-3). Moreover, organoids are characterized by a well-  
152 defined cell/Matrigel interface with a myoepithelial layer, which was not impacted by miR-  
153 106a overexpression (Figure 3E, CD44 and p63). In addition, organoids expressed  $\beta$ -catenin  
154 (cell junction marker) adjacent to the plasma membranes and miR-106a overexpression did  
155 not show any effect on its localization and did not disrupt cell junctions (Figure 3E,  $\beta$ -  
156 catenin). These results demonstrate that miR-106a does not disrupt the structure of organoids.

157 To test miR-106a-3p and miR-106a-5p individual functions on capacity of organoid-  
158 initiating cells, miR-106a-3p or miR-106a-5p mimics were transfected in HMEC cells (Figure  
159 3F-G). We examined miR-106a-5p and miR-106a-3p expression by RT-qPCR and observed  
160 that miR-106a-5p is expressed both in control, miR-106a-5p and miR-106a-3p cells (Figure  
161 3F). As expected, miR-106a-3p is only expressed in miR-106a-3p transfected cells (Figure  
162 3F). Next, we studied the individual role of miR-106a-5p and miR-106a-3p overexpression on  
163 organoid-initiating frequency (Figure 3G). The overexpression of miR-106a-3p significantly  
164 increases organoids number by about 5-fold compared to control and miR-106a-5p (Figure  
165 3G). Our results indicate that miR-106a-5p does not impact on organoids frequency,  
166 demonstrating the specific requirement of miR-106a-3p to mediate the self-renewal capacity

167 of organoid-initiating cells (Figure 3G). Taken together, these results demonstrate that i) miR-  
168 106a-3p expression's is only restricted to organoids, and ii) miR-106a-3p, but not miR-106a-  
169 5p, is required for the development of human organoids.

### 170 *Identification of miR-106a-3p targets*

171 Since a single miRNA can potentially target hundreds of genes <sup>10</sup>, we next cross-  
172 referenced the predicted targets of miR-106a-3p using four different algorithms (miRanda,  
173 miRDB, DianaMT and miRWalk). We found 67 genes common to the four algorithms (Figure  
174 4A). In parallel, to study the effect of the over-expression of miR-106a-3p on global gene  
175 expression patterns, we isolated total RNA from HMEC cells transfected with miR-106a-3p  
176 mimic and performed microarray analysis (HG-U133 Plus 2.0). The results indicated that  
177 transfection of miR-106a-3p induced significant changes in the expression of 6465 genes (p  
178 value <0.05; Table S1) when compared to controls. To establish whether the global  
179 expression changes observed upon miR-106a-3p overexpression correlated with the data from  
180 prediction algorithms (Figure 4A), both datasets were intersected (Table S1). The results  
181 show that on an average <7% of the genes differentially expressed following miR-106a-3p  
182 transfections are direct or indirect regulatory targets of this miRNA (Figure S2 and Figure  
183 4B). Almost half of the differentially expressed genes were down-regulated (3153, ~48%)  
184 following miR-106a-3p transfection (Table S1). Of the 3153, only 35 (1.1%) genes were  
185 found to be direct targets of miR-106a-3p by the aforementioned four different algorithms  
186 (Figure 4B).

187 We next screened for the relevance of these putative targets in two different assays  
188 including 1) the increase in organoid-initiating frequency (Figure 4C and D), and 2) the  
189 enrichment in the CD44<sup>high</sup>/CD24<sup>low</sup> cell population (Figure 4E). We hypothesized that the  
190 depletion of the target with siRNA would increase organoid initiating frequency and induce a  
191 CD44<sup>high</sup>/CD24<sup>low</sup> phenotype. Results showed that, out of the thirty-five targets tested, ten  
192 candidates had the capacity to increase organoid initiating frequency (Figure 4C and D).  
193 Therefore, depletion of *ADD3*, *B4GALT6*, *C12orf14*, *CCAR1*, *MCM10*, *PANK3*, *PP6R3*,  
194 *PXMP3*, *TLE4*, and *TSPYL2* genes increased the number of organoids and exhibited a similar  
195 effect as miR-106a-3p (Figure 4C and D). To determine if the individual depletion of each of  
196 these ten genes shifted towards a CD44<sup>high</sup>/CD24<sup>low</sup> phenotype, we measured CD44 and  
197 CD24 levels in cells depleted for each individual transcript. We observed that the depletion of  
198 these genes increased, similar to what observed with miR-106a-3p overexpression, a cell



199 population CD44<sup>high</sup>/CD24<sup>low</sup> (Figure 4E). Taken together, these results demonstrate that  
200 miR-106a-3p repress multiple target genes, with downregulation of individual targets  
201 recapitulating the total miRNA effects required for both CD44<sup>high</sup>/CD24<sup>low</sup> phenotype and  
202 organoid development.

203

#### 204 *miR-106a-3p and its targets regulate the expression of OCT4, SOX2 and NANOG*

205 Our results demonstrate that miR-106a-3p promotes the enrichment of  
206 CD44<sup>high</sup>/CD24<sup>low</sup> cells and thereby enhancing stem/progenitor cell properties. To identify  
207 common features among different human pluripotent cells and to search for clues into the  
208 genetics of human germ cell, we next compared the miR-106-3p endogenous expression  
209 profile in a series of cancer cell lines, normal cell lines as well as germ cells, including pure  
210 hESCs, that express high levels of endogenous pluripotency markers (Figure S4 and Figure  
211 5A). The miR-106a expression pattern from 20 different cell lines was examined by RT-  
212 qPCR (Figure S4 and Figure 5A). The results showed that miR-106a-3p was expressed  
213 exclusively in 2 human pluripotent embryonic carcinoma lines (NCC-IT, TERA1) which are  
214 derived from poorly differentiated germ cell tumors and in human embryonic stem cells  
215 (hESCs) (Figure 5A).

216 To further investigate whether the ten target genes of miR-106a-3p were associated  
217 with the stemness properties, the expression of the ten genes *ADD3*, *B4GALT6*, *C12Orf14*,  
218 *CCAR1*, *MCM10*, *PANK3*, *PP6R3*, *PXMP3*, *TLE4*, and *TSPYL2* was analyzed using  
219 StemChecker, a web-based tool to explore stemness in a gene set. The resulting chart showed  
220 that this gene set is significantly enriched in targets of NANOG, SOX2 and OCT4 (the human  
221 pluripotency master regulators) as well as E2F4 (Figure 5B). To test the effect of miR-106a-  
222 3p on pluripotent transcriptional activity, we assessed the mRNA and protein levels of three  
223 core pluripotent transcription factors in miR-106a-3p expressing cells compared to control  
224 cells. The three core pluripotent transcription factors were induced in miR-106a-3p  
225 overexpressing cells as compared to those expressing mimic control miRNA, both at the  
226 genomic (Figure 5C) and proteomic levels (Figure 5D).

227 Finally, we analyzed the expression of these three core pluripotent transcription factor  
228 genes upon individual knockdown of each of the ten target genes (Figure 5E-G), previously  
229 validated by qRT-PCR (Figure S3). We observed that the depletion of *TSPYL2*, *PXMP3*,

230 *PP6R3*, *PANK3* increased the expression of the three core pluripotent transcription factors  
231 (Figure 5H). *B4GALT6*, *ADD3*, *C12ORF14*, *CCAR1* when depleted, increased *OCT4* and  
232 *SOX2*; while depletion of *TLE4* increased gene expression of *SOX2* and *NANOG* (Figure 5H).  
233 Finally, the depletion of *MCM10* gene induced *OCT4* expression only (Figure 5H). These data  
234 demonstrate that miR-106a-3p plays a role in the process of pluripotency by regulating the  
235 core of master regulators OCT4, SOX2, and NANOG through the control of a set of specific  
236 genes.

### 237 ***miR-106a-3p controls human organoid development***

238 To further determine whether miR-106a-3p is required for self-renewal capacity of  
239 organoids-initiating cells, miR-106a cells were transfected with LNA-anti-miR-106a-3p or  
240 LNA-control (Figure 6A-B). We confirmed that miR-106a-3p and not miR-106a-5p  
241 expression was decreased in miR-106a cells transfected with LNA-antimiR-106a-3p using  
242 RT-qPCR (Figure 6A). As expected, the levels of miR-106a-3p in cells transfected with anti-  
243 miR-106a-3p were considerably low compared to control cells (Figure 6A), whereas miR-  
244 106a-5p levels remained unchanged (Figure 6A). To further confirm the specific requirement  
245 of miR-106a-3p for self-renewal of organoid-initiating cells, miR-106a-infected and control  
246 cells were transfected with LNA-anti-miR-106a-3p or LNA-control and were grown in  
247 organoids. In control cells, anti-miR-106a-3p did not repress the formation of organoids  
248 (Figure 6B), since miR-106a-3p is not expressed in primary HMEC (Figure S4). As expected,  
249 we observed that suppression of miR-106a-3p abrogated the self-renewal capacity of  
250 organoids-initiating cells (Figure 6B).

251 Since we demonstrated that miR-106a-3p contributed to pluripotency (Figure 5) and  
252 self-renewal (Figure 6B) in human adult stem cells, we next compared the miR-106-3p  
253 endogenous expression profile in miR-106a-3p transfected cells, in control cells and in  
254 hESCs, that express high levels of endogenous pluripotency markers. The expression of miR-  
255 106a-5p as well as miR-302b (a gold standard marker for pluripotency) was detectable in  
256 HMEC control (HMEC+ctl), HMEC transfected with miR-106a-3p mimic (HMEC+miR-  
257 106a-3p) and hESCs cells (Figure 6C). Interestingly, the expression of miR-106a-3p was only  
258 detectable in HMEC miR-106a-3p and hESCs (Figure 6C). hESCs are pluripotent stem cells  
259 derived from blastocysts and have the property to proliferate indefinitely *in vitro* while  
260 maintaining the capacity to differentiate into derivatives of all three germ layers: ectoderm,  
261 mesoderm and endoderm<sup>18,23</sup>. We used human ES cells to derive early stages of endoderm,

262 mesoderm and ectoderm (Figure S5A). Interestingly, the expression of the miR-106a-3p was  
263 significantly upregulated upon mesoderm and ectoderm differentiation compared to  
264 embryonic stem cells (hESCs) (Figure 6D). To explore how miR-106a-3p could control  
265 differentiation, we next took advantage of the ability of hESCs to differentiate more readily  
266 than aSCs. hESCs were transfected with LNA-anti-miR-106a-3p (anti-miR106a-3p) or LNA-  
267 control (anti-miR-ctl) (Figure S5B, D and F) prior to endoderm, mesoderm and ectoderm  
268 differentiation. The decreased level of miR-106a-3p in anti-miR106a-3p transfected cells as  
269 compared to control cells was validated by RT-qPCR (Figure S5B, D and F). Next, we  
270 applied directed differentiation protocols to trigger the three germ layers to find out whether  
271 blocking miR-106a-3p expression could change expression of transcription factor *OCT4*,  
272 *SOX2* and *NANOG*. Expression of *SOX2* decreased during endoderm, mesoderm and  
273 ectoderm differentiation, while *OCT4* decreased during endoderm and ectoderm  
274 differentiation in anti-miR106a-3p transfected cells compared to control cells (Figure S 5C, E  
275 and G). Conversely, expression of *NANOG* increased during mesoderm differentiation in anti-  
276 miR-106a-3p cells (Figure S5E). To further understand the impact of miR-106a-3p depletion  
277 on hESCs differentiation, we monitored expression of specific genes upon induction of the  
278 three embryonic germ layers (Figure 6E, F and G). Expression of endodermal genes was not  
279 or weakly affected by the level of expression of miR-106a-3p (Figure 6B). In contrast,  
280 expression of mesoderm- and ectoderm-specific genes increased upon miR-106a-3p down-  
281 regulation (Figure 6D and F). Collectively, these data demonstrate that miR-106a-3p is  
282 involved in the differentiation process and is essential for human organoid development.

283

## 284 Discussion

285 Organoids are very powerful self-organizing cellular systems that have been grown in  
286 3D from human adult or pluripotent stem cells. Organoids show the exciting potential of  
287 modeling key aspects of human development and disease processes, as well as advance efforts  
288 towards precision medicine and human disease modeling. Central to the success of organoid  
289 cultures is the understanding of the endogenous stem cell niche and signaling pathways that  
290 control lineage specification in tissues. Although it can be argued that identifying the stem  
291 cells is not critical for culturing primary tissue, the understanding of the stem cell niche is  
292 essential for the sustenance and indefinite propagation of cultures. Therefore, our aim was to  
293 uncover key factors, such as miRNAs, essential in promoting stem cell derived organoids.  
294 This involves reducing heterogeneity within the organoid-initiating cell population through a  
295 better characterization of initiating cell types and improvement of tissue-specific organoid  
296 growth conditions. A more complete understanding of the development of organoids would  
297 enhance their relevance as models to study organ morphology, function and disease, and  
298 would open new avenues for drug development and regenerative medicine.

299 Herein, we combined organoid analyses and miRNA screening to identify the  
300 previously uncharacterized miR-106a-3p as a master regulator of the stem/progenitor cell  
301 pools which specify the organoid-initiating cell population from human primary cells (Figure  
302 6H). By coupling gene array to siRNA screening approaches, we further identified ten target  
303 genes of miR-106a-3p (*ADD3*, *B4GALT6*, *C12Orf14*, *CCAR1*, *MCM10*, *PANK3*, *PP6R3*,  
304 *PXMP3*, *TLE4*, and *TSPYL2*) which govern self-renewal capacity of organoid-initiating cells  
305 and thus maintain stem/progenitor cell properties. Interestingly, knocking down each of these  
306 ten genes phenocopied the effects of the miR-106a-3p overexpression. A recurring  
307 observation in organoid models is that the signaling pathways governing organoid formation  
308 are identical to those utilized during *in vivo* organ development and homeostasis. Specifically,  
309 from the targets identified in this study, *TLE4* is a transcription factor which has been  
310 previously shown to play a role in early embryogenesis<sup>11</sup>. Indeed, *Tle4*-knockout mice die at  
311 around four weeks with defects in bone development and bone marrow aplasia<sup>25</sup>. *TLE4*  
312 expression has also been shown to increase upon LIF withdrawal and loss of *TLE4* leads to  
313 increased pluripotency marker expression and inhibits ESC differentiation towards both the  
314 epiblast and endoderm lineages<sup>11</sup>. These data are consistent with our observation that miR-  
315 106a-3p inhibits *TLE4*. *C12Orf14* (*FAM60A*) gene is a regulator of SIN3-HDAC function and  
316 gene expression<sup>16</sup>. Indeed, *C12Orf14* is a subunit of the Sin3 deacetylase complex and

317 resides in active Histone deacetylase 1 and 2 (HDAC1/2). HDAC1-null embryos die before  
318 E10.5, showing that the *HDAC1* gene is essential for embryonic development. Hence, these  
319 observations are consistent with the effects of miR-106a-3p on *C12orf14*. *MCM10* is  
320 exclusive to eukaryotes and is essential for both initiation and elongation phases of nuclear  
321 DNA replication<sup>12</sup>. The physiological function of *MCM10* protein has been shown in the  
322 Mcm10-knockout mouse model and reveals that *MCM10* expression is required for early  
323 embryogenesis. Thus, the effect of miR-106a-3p on this gene is in agreement with its  
324 previously reported function.

325 Collectively, in each of the experimental conditions investigated, aSC-derived organoids are  
326 controlled by the expression of a single miRNA, miR-106a-3p. This miRNA targets a specific  
327 set of genes to regulate, *in fine*, OCT4, SOX2 and NANOG, therefore, reduces heterogeneity  
328 within the organoid-initiating cell population to favor organogenesis (Figure 6H). Hence, a  
329 complex mechanism (Figure 6H) is clearly in place in order to fine-tune the expression of  
330 miR-106a-3p both in organoids and upon differentiation, which is conserved throughout  
331 development in adult and embryonic stem cells. Recent reports showed that differentiation of  
332 aSCs<sup>27</sup> and mouse ESCs<sup>22</sup> are modulated through post-transcriptional attenuation of key  
333 factors such as OCT4, SOX2 and NANOG. It has been speculated that the same set of  
334 transcription factors plays an important role in the maintenance of multipotency and self-  
335 renewal aSCs. Although hESC pluripotency requires OCT4 and SOX2, the consequence of  
336 elevated Oct4 and Sox2 levels on hESCs renewal and pluripotency have been overlooked. A  
337 less than 2-fold increase of Oct4 protein turns murine and human ESCs into primitive  
338 endoderm and mesoderm<sup>17,29</sup> and more specifically mesendoderm<sup>21</sup>. Regulation by miRNA  
339 provides a way to finely tune hESC self-renewal and differentiation. Indeed, miRNAs play an  
340 important role in gene regulation during pluripotency, self-renewal and differentiation of  
341 ESCs. miRNAs can be divided into two subgroups: pluripotent miRNAs and pro-  
342 differentiation miRNAs. Pluripotent miRNAs have been found to be involved in maintaining  
343 self-renewal and pluripotency of ESCs. This class of miRNAs, including miR-137, miR-184,  
344 miR-200, miR-290, miR-302 and miR-9 is exclusively expressed in the pluripotent state and  
345 rapidly decreases upon differentiation stimuli<sup>9</sup>. By contrast, pro-differentiation miRNAs,  
346 such as let-7, miR-296, miR-134 and miR-470, have been found to regulate the differentiation  
347 processes in pluripotent cells<sup>1</sup>. These miRNAs are found to be upregulated during  
348 differentiation in ESCs and inhibited the expression of pluripotency factors, including Nanog  
349 and Sox2<sup>1</sup>. A miRNA has two arms: miR-5p and miR-3p (miR-5p/-3p). Depending on the

350 tissue or cell types, both arms can become functional. Indeed, selection of either or both of the  
351 5p or 3p miRNA species has been reported to be dependent on temporal, spatial,  
352 physiological and pathological conditions <sup>8,26</sup>. Our data demonstrate that miR-106a-3p  
353 features an unexpected biological function in modulating the human pluripotency factor  
354 network (OCT4, SOX2 and NANOG) and, in turn, in regulating differentiation. Indeed, a low  
355 level of endogenous miR-106a-3p is sufficient to induce expression of OCT4, SOX2 and  
356 NANOG. Upon differentiation, miR-106a-3p is elevated and therefore reinforces ESC  
357 pluripotency at the expense of differentiation, and more specifically towards mesoderm and  
358 ectoderm or mesectoderm. Finally, the role of the miR-106a-3p is of particular interest in  
359 yield predictions on how mammary cells acquire stem cell-like properties in normal state.  
360 Indeed, the capacity of miR-106a-3p to promote stem cell-like behavior gives us some clues  
361 on how stem/progenitor cell states may be specified in mammary cells. Future studies are  
362 necessary to define by which precise mechanism miR-106a-3p controls the human pluripotent  
363 stem cells, and how cells can decide or control which variant of the miRNA to express under  
364 what circumstances.

365

366

367 **Acknowledgments**

368 This work was supported in part by grant from "La Region Nouvelle-Aquitaine" is warmly  
369 thanked for financial support. We thank Dr. E. Chevet and Prs J. Robert and T. Hupp for  
370 critical reading of the manuscript, Pr. P. Soubeyran for leadership at the SIRIC BRIO, Dr.  
371 Valérie LeMorvan for help in setting up the RT-qPCR system, and Dr. R. Nookala of Institut  
372 Bergonié for the medical writing service.

373

374

375

376 **Author Contributions**

377 Conceptualization, D.F. and F.D.; Methodology, D.F., F.D., and M.P.; Investigation, D.F.,  
378 F.D., and M.P.; Writing – Original Draft, D.F.; Writing – Review & Editing, D.F., F.D., and  
379 M.P.; Resources, D.F. and M.P.; Supervision, D.F., and M.P.

380

381

382

383 **Declaration of Interests**

384 None

385



386  
387  
388  
389  
390  
391  
392  
393  
394  
395  
396  
397  
398  
399  
400  
401  
402  
403  
404  
405  
406  
407  
408  
409  
410  
411  
412  
413  
414  
415  
416  
417  
418  
419

Reference List

- <sup>1</sup> F. Anokye-Danso, *et al.*, "Highly efficient miRNA-mediated reprogramming of mouse and human somatic cells to pluripotency," **8**(4), 376 (2011).
- <sup>2</sup> C. L. Bishop, *et al.*, "Primary cilium-dependent and -independent Hedgehog signaling inhibits p16(INK4A)," **40**(4), 533 (2010).
- <sup>3</sup> V. Borgdorff, *et al.*, "Multiple microRNAs rescue from Ras-induced senescence by inhibiting p21(Waf1/Cip1)," **29**(15), 2262 (2010).
- <sup>4</sup> J. Debnath and J. S. Brugge, "Modelling glandular epithelial cancers in three-dimensional cultures," **5**(9), 675 (2005).
- <sup>5</sup> D. Fessart, H. Begueret, and F. Delom, "Three-dimensional culture model to distinguish normal from malignant human bronchial epithelial cells," **42**(5), 1345 (2013).
- <sup>6</sup> D. Fessart, *et al.*, "Secretion of protein disulphide isomerase AGR2 confers tumorigenic properties," **5** (2016).
- <sup>7</sup> H. Ghebeh, *et al.*, "Profiling of normal and malignant breast tissue show CD44high/CD24low phenotype as a predominant stem/progenitor marker when used in combination with Ep-CAM/CD49f markers," **13**, 289 (2013).
- <sup>8</sup> L. Guo and Z. Lu, "The fate of miRNA\* strand through evolutionary analysis: implication for degradation as merely carrier strand or potential regulatory molecule?," **5**(6), e11387 (2010).
- <sup>9</sup> H. B. Houbaviy, M. F. Murray, and P. A. Sharp, "Embryonic stem cell-specific MicroRNAs," **5**(2), 351 (2003).
- <sup>10</sup> A. Jacobsen, *et al.*, "Analysis of microRNA-target interactions across diverse cancer types," **20**(11), 1325 (2013).
- <sup>11</sup> A. F. Laing, S. Lowell, and J. M. Brickman, "Gro/TLE enables embryonic stem cell differentiation by repressing pluripotent gene expression," **397**(1), 56 (2015).
- <sup>12</sup> H. J. Lim, *et al.*, "Targeted disruption of Mcm10 causes defective embryonic cell proliferation and early embryo lethality," **1813**(10), 1777 (2011).
- <sup>13</sup> S. A. Mani, *et al.*, "The epithelial-mesenchymal transition generates cells with properties of stem cells," **133**(4), 704 (2008).
- <sup>14</sup> Iglesias J. Manuel, *et al.*, "Mammosphere formation in breast carcinoma cell lines depends upon expression of E-cadherin," **8**(10), e77281 (2013).
- <sup>15</sup> J. Mathieu and H. Ruohola-Baker, "Regulation of stem cell populations by microRNAs," **786**, 329 (2013).

- 420 <sup>16</sup> I. M. Munoz, *et al.*, "Family with sequence similarity 60A (FAM60A) protein is a cell cycle-  
421 fluctuating regulator of the SIN3-HDAC1 histone deacetylase complex," **287**(39), 32346  
422 (2012).
- 423 <sup>17</sup> H. Niwa, J. Miyazaki, and A. G. Smith, "Quantitative expression of Oct-3/4 defines  
424 differentiation, dedifferentiation or self-renewal of ES cells," **24**(4), 372 (2000).
- 425 <sup>18</sup> B. E. Reubinoff, *et al.*, "Embryonic stem cell lines from human blastocysts: somatic  
426 differentiation in vitro," **18**(4), 399 (2000).
- 427 <sup>19</sup> J. S. Schwarz, H. R. de Jonge, and J. N. Forrest, Jr., "Value of Organoids from Comparative  
428 Epithelia Models," *Yale J. Biol. Med.* **88**(4), 367 (2015).
- 429 <sup>20</sup> G. Stefani and F. J. Slack, "Small non-coding RNAs in animal development," **9**(3), 219 (2008).
- 430 <sup>21</sup> S. Stefanovic, *et al.*, "Interplay of Oct4 with Sox2 and Sox17: a molecular switch from stem cell  
431 pluripotency to specifying a cardiac fate," **186**(5), 665 (2009).
- 432 <sup>22</sup> Y. Tay, *et al.*, "MicroRNAs to Nanog, Oct4 and Sox2 coding regions modulate embryonic stem  
433 cell differentiation," **455**(7216), 1124 (2008).
- 434 <sup>23</sup> J. A. Thomson, *et al.*, "Embryonic stem cell lines derived from human blastocysts," **282**(5391),  
435 1145 (1998).
- 436 <sup>24</sup> P. M. Voorhoeve, *et al.*, "A genetic screen implicates miRNA-372 and miRNA-373 as oncogenes  
437 in testicular germ cell tumors," **124**(6), 1169 (2006).
- 438 <sup>25</sup> J. C. Wheat, *et al.*, "The corepressor Tle4 is a novel regulator of murine hematopoiesis and  
439 bone development," **9**(8), e105557 (2014).
- 440 <sup>26</sup> J. S. Yang, *et al.*, "Widespread regulatory activity of vertebrate microRNA\* species," **17**(2), 312  
441 (2011).
- 442 <sup>27</sup> R. Yi, *et al.*, "A skin microRNA promotes differentiation by repressing 'stemness'," **452**(7184),  
443 225 (2008).
- 444 <sup>28</sup> X. Yin, *et al.*, "Engineering Stem Cell Organoids," **18**(1), 25 (2016).
- 445 <sup>29</sup> D. Zeineddine, *et al.*, "Oct-3/4 dose dependently regulates specification of embryonic stem  
446 cells toward a cardiac lineage and early heart development," **11**(4), 535 (2006).  
447  
448  
449

## 450 **Methods**

### 451 **CONTACT FOR REAGENT AND RESOURCE SHARING**

452 Further information and requests for resources and reagents may be directed to and will be  
453 fulfilled by the Lead Contact, Delphine Fessart (Delphine.fessart@yahoo.fr).

454

### 455 **EXPERIMENTAL MODEL DETAILS**

#### 456 **Cell lines**

457 Normal finite lifespan HMECs were obtained from Lonza and were grown in MEBM phenol  
458 red-free medium supplemented with MEGM Single Quots (Lonza, Basel, Switzerland).  
459 HUES cells (HUES9) were cultured as previously described <sup>21</sup>

#### 460 **Cell culture**

461 Cells at Passage 6 (P6) were used for the miRNA screening and follow-up miRNA studies,  
462 unless otherwise stated. For three-dimensional culture (3D) organoids, cells were grown in  
463 laminin-rich basement membrane growth factor-reduced Matrigel (BDBiosciences) (Matrigel)  
464 as we previously described <sup>5</sup>.

### 465 **METHOD DETAILS**

#### 466 **High-content miRNA screening**

467 The miRNA screen was performed in triplicate, using the Human pre-miR miRNA library  
468 (Ambion), consisting of 328 miRNAs, together with control small interfering RNAs (siRNAs)  
469 targeting Cyclophilin B (Dharmacon), CD44, and CD24 (Qiagen). HMECs at P6 were  
470 reverse-transfected with 30 nM miRNA in 384-well format using HiperFect (QIAGEN), in  
471 triplicate. Plates were incubated for 46 h, medium was changed and fixed/stained 72 h later  
472 with CD44-FITC conjugated antibody (Abcam), CD24 antibody (BD Biosciences) and  
473 GtaMo AlexaFluor546 (Invitrogen), 4',6-diamidino-2-phenylindole (DAPI, Sigma). High-  
474 content images were acquired with the DMI8 microscope (Leica) at 10× magnification, and  
475 analysis was performed using the Analysis software (Leica). The Z-factor provides a metric of  
476 the median absolute deviation by which an individual miRNA transfected condition (averaged  
477 over three replicates) differs from the population median (median percentage  
478 CD44<sup>high</sup>/CD24<sup>low</sup> population).

#### 479 **Flow cytometry analysis of gene expression**

480 Following trypsinization, cells were strained through a 40  $\mu$ M nylon mesh to ensure single  
481 cells are obtained and suspended in ice-cold solution to obtain a density of  $1 \times 10^6$  cells/ml.  
482 Antibodies (CD44 conjugated with FITC; CD24 conjugated with phycoerythrin, PE) were  
483 added to the cell suspension at concentrations suggested by the manufacturer and cells were  
484 incubated at 4°C in the dark for 45 min. These labeled cells were washed twice, suspended in  
485 PBS and analyzed using a flow cytometer (Becton Dickinson). The cells were stained with  
486 either isotype-matched control antibodies or with no primary antibody as negative controls.  
487 No difference was observed between these two controls.

488

### 489 **RNA isolation and miRNA microarray**

490 Total RNAs were isolated from three independent samples of HMEC-transfected cells using  
491 the miRNeasy Kit (Qiagen) according to the manufacturer's instructions. The quantity and  
492 size of RNAs were analyzed for concentration, purity and integrity by using  
493 spectrophotometric methods in combination with the Agilent Bioanalyzer (Agilent  
494 Technologies).

495 Microarray analyses were performed on 3 independent replicates of mimic control transfected  
496 cell samples (control), 3 independent replicates of miR-106a-3p transfected cell samples. Data  
497 were analyzed and normalized using the Rosetta Resolver Error Model. In order to remove  
498 systemic noise from the data, genes with low intensity values that are close to background  
499 were filtered out. We use standard deviation of the background ( $\sigma$ ) value to estimate  
500 background. We then filter-extract the genes identified as being significantly differentially  
501 expressed between the conditions by fold change applied to the genes passing the background  
502 filtering criteria. Differentially expressed probe sets were identified using a p-value <0.05.  
503 The gene expression data have been deposited in the ArrayExpress database at EMBL-EBI  
504 ([www.ebi.ac.uk/arrayexpress](http://www.ebi.ac.uk/arrayexpress)) under accession number E-MTAB-6594.

### 505 **miRNA target download**

506 The miRNA targets predictions based on miRanda, DianaMT, miRDB and miRWalk were  
507 downloaded from [www.microrna.org](http://www.microrna.org) (August 2010 release), [http://zmf.umm.uni-](http://zmf.umm.uni-heidelberg.de/apps/zmf/mirwalk2/)  
508 [heidelberg.de/apps/zmf/mirwalk2/](http://zmf.umm.uni-heidelberg.de/apps/zmf/mirwalk2/) and from <http://mirdb.org/miRDB/>.

### 509 **miRNA target Stem cells signature analysis**

510 Gene set stem cells enrichment analysis for predicted miRNA targets was carried out using  
511 the web interface of Stem checker (<http://stemchecker.sysbiolab.eu/>) using default settings.

### 512 **miRNA and antigomiR transfections**

513 HMECs were transfected with 30 nM miRNA or 30 nM antigomiR (anti-miRNA) in 384-well  
514 plates using HiperFect (Qiagen), and the protocol described above for ‘High-content miRNA  
515 Screening’ was followed.

### 516 **Quantitative reverse transcriptase-polymerase chain reaction**

517 Methodology for quantitative reverse transcriptase-polymerase chain reaction (RT-qPCR) has  
518 been described previously <sup>6</sup>. Quantitative RT-PCR reactions were performed with SYBR  
519 Green Master Mix (ABI). For siRNA knockdown experiments, RNA was extracted from  $1 \times$   
520  $10^5$  cells 48 hr post-transfection. *GAPDH* levels were quantified for each cDNA sample in  
521 separate qPCR reactions and were used as an endogenous control. Target gene-expression  
522 levels were quantified using target specific probes. Values were normalized to the internal  
523 *GAPDH* control and expressed relative to *siGLO* transfected control levels (100%). All qPCR  
524 reactions were run in triplicate from three independent samples.

### 525 **Retroviral stable cell lines**

526 106a-5p/-3p miRNA hit was cloned into MirVec as previously described <sup>3</sup>. After sequence  
527 verification, 5 mg of plasmid DNA was transfected into HMEC P5 was transduced into  
528 Phoenix packaging cells using Fugene (Roche, Basel, Switzerland). Viral supernatant was  
529 harvested 48 h after transfection. Target HMECs were seeded in a six-well plate at a density  
530 of 5000 cells/cm<sup>2</sup> and spininfected the following day at 32 °C, 350 r.p.m. for 1 h with viral  
531 supernatant in the presence of 8 mg/ml polybrene. Cells were selected with blasticidin (3  
532 mg/ml). Cells were harvested for RT-qPCR analysis.

### 533 **Immunofluorescence**

534 Fixed cells were permeabilized with 0.1% Triton X-100 (Sigma) for 30 min at room  
535 temperature (RT) cells were stained for 2 h at RT with a primary antibody followed by a  
536 secondary antibody staining for 1 h at RT (AlexaFlour-488-conjugated goat anti-mouse  
537 antibody (Invitrogen). Cells were imaged on Leica Dmi8 microscope. Images were analyzed  
538 using Leica software. Primary antibodies used were Mo $\alpha$ CD44 (BD Biosciences); Rb $\alpha$ CD44  
539 (Abcam), Mo $\alpha$ CD24 (BD Biosciences), Rb $\alpha$ cleaved Caspase-3 ((Asp175), Cell Signaling),

540 Moabeta-catenin (BD Biosciences), Moap63 (clone 4A4; Santa CruzBiotechnology),  
541 cleaved-caspase 3 (Cell Signaling). Secondary antibodies were the appropriate AlexaFluor-  
542 488 or AlexaFluor-546 antibody (Invitrogen). DAPI and CellMask Deep Red (Invitrogen)  
543 were also included. Images were collected with the Dmi8 microscope (Leica) or the Zeiss 510  
544 Meta Confocal microscope (Zeiss) and Developer Software (Leica) used for image analysis.

#### 545 **In situ Hybridization (ISH) and Microscopy**

546 ISH was performed by using specific DIG-labeled miRNA LNAprobes from Exiqon. Briefly,  
547 cells were fixed in 4% paraformaldehyde for 30 min, followed by 70% ethanol for at least 16  
548 h at 4°C. Cells were then permeabilized with 0.1% Triton X-100 for 10 min. The washed cells  
549 were then pre-hybridized with a prehybridization buffer (46 SSC, 25% formamide, 36  
550 Denhardt's solution, 2% blocking reagents, 0.25 mg/ml yeast tRNA, 0.25 mg/ml salmon  
551 sperm DNA) for 30 min at room temperature, followed by hybridization at 23 °C below the  
552 T<sub>m</sub> of the LNA probe for 2 h. The cells were subsequently washed with Washing Buffer I (46  
553 SSC with 0.1% Tween 20), II (26 SSC), and III (16 SSC) at the hybridization temperature.  
554 The cells were blocked with a signal enhancer (Lifetechnologies) for 1 h at room temperature,  
555 and then incubated with a mouse anti-DIG antibody at a dilution of 1:1000 at 4°C overnight.  
556 The cells were washed with PBS three times to remove unbounded mouse anti-DIG antibody.  
557 Then, cells were incubated with a fluorescently labeled secondary antibody. To confirm that  
558 the ISH signals were indeed from the specific hybridization of the probes with the target  
559 RNA, the cells stained with a specific miR-scramble DIG-labeled miRNA LNAprobes from  
560 Exiqon. The DNA was stained with DAPI. The samples were mounted on a fluorescent  
561 mounting medium (Dako). The images were taken with a LSM-510 Meta (Zeiss) confocal  
562 microscope.

#### 563 **ESCs differentiation**

564 HUES cells (HUES9) were cultured as previously described <sup>21</sup>. Endoderm was induced by  
565 treating the cells for 3 days with 100 ng activin A (Peprotech, france) in DMEM  
566 supplemented with 10% FCS. Mesoderm was induced by culturing the cells in RPMI  
567 supplemented with 20% B27 (Thermofisher, France) and added with 5 µM CHIR 99021  
568 (Stem cell, France) for 24 hr, then with BMP2 (10 ng/ml, Thermofisher, France) and 5 µM  
569 CHIR 99021 the second day and finally IWR1 2 µM and BMP2 (10 ng/ml) the third day.  
570 Ectoderm was induced in RPMI supplemented with N2 medium (Thermofisher) and 0.5 µM  
571 retinoic acid for three days.

572

573

574 **QUANTIFICATION AND STATISTICAL ANALYSES**

575 Quantification data are presented as means  $\pm$  SEM. Statistical significance was analyzed using  
576 an unpaired Student's t test. A difference at  $p < 0.05$  was considered statistically significant.

577

578

579

580

## Figure 1

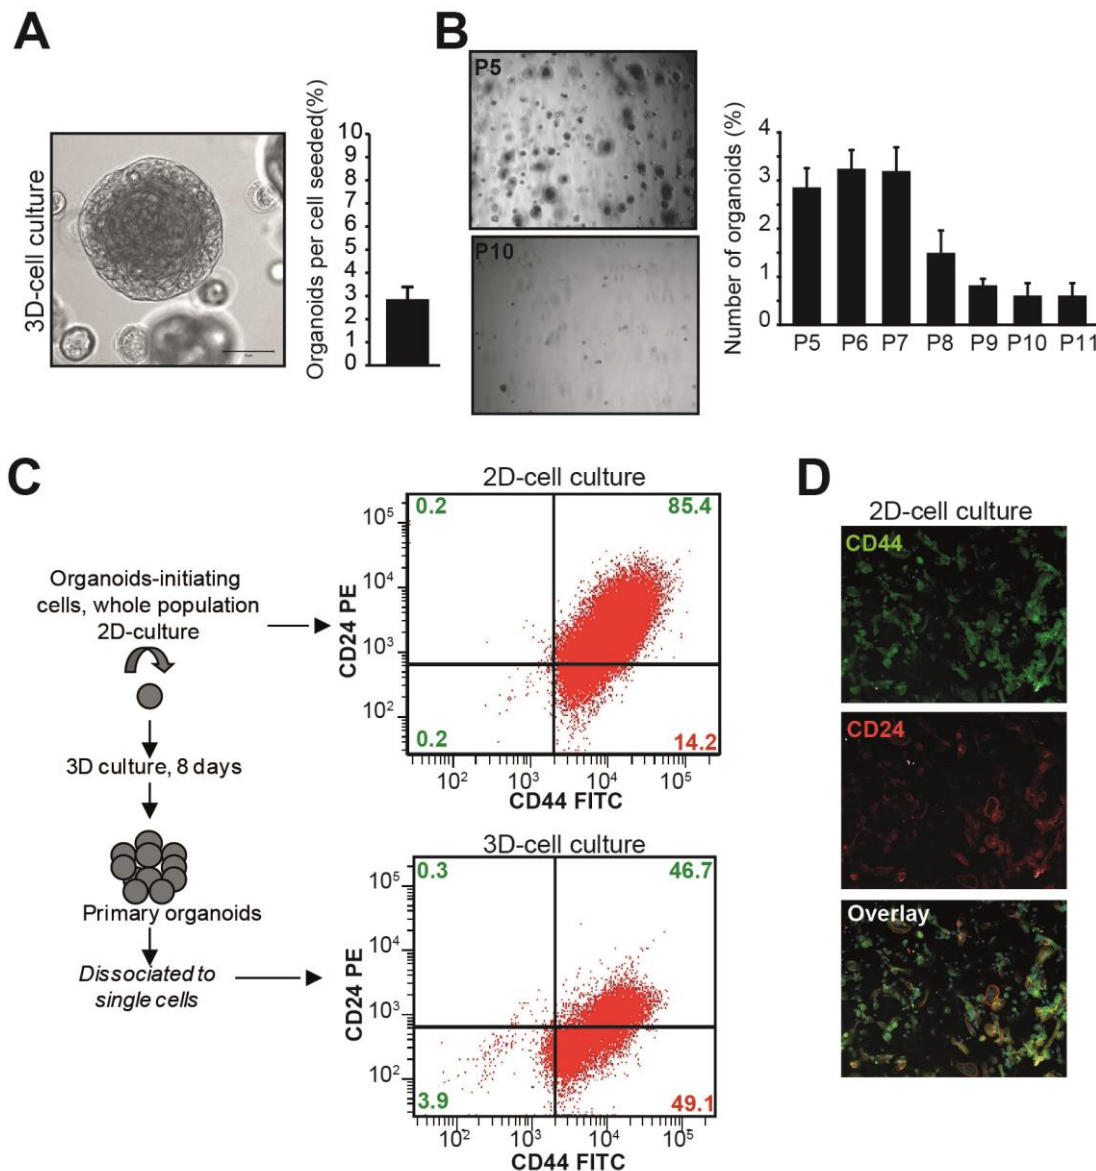

581

### 582 **Figure 1. 3D-culture confers cells properties different from 2D-culture**

583 **A**, Morphology of organoids from HMEC cells cultivated in Matrigel. HMECs are primary  
 584 cells obtained by dissociation of purified non-diseased human mammary. Brightfield  
 585 microscopic image of one organoid, bar length 50  $\mu$ m. The bar graph shows the mean of  
 586 organoids per well (mean  $\pm$  SEM.) after 10 days of culture from three independent  
 587 experiments. **B**, Representative brightfield pictures of organoids per well grown in 3D at  
 588 passage 5 (P5) and passage 10 (P10). The bar graph shows the mean  $\pm$  SEM of organoids per  
 589 well, from passage P5 to passage P11. Data are from three independent experiments for each  
 590 passage. **C**, Flow cytometric analyses of CD44/CD24 in HMEC cells derived from 2D-cell



591 culture (top) or following primary organoids culture (3D-cell culture - bottom). The  
592 expression of CD44<sup>high</sup>/CD24<sup>low</sup> in organoids cells was compared with the 2D culture cells.  
593 A minimum of 10,000 events were collected per sample. **D**, Analysis by immunofluorescence  
594 of CD44 (green) and CD24 (red) expression levels in HMEC from 2D culture.

595

596

Figure 2

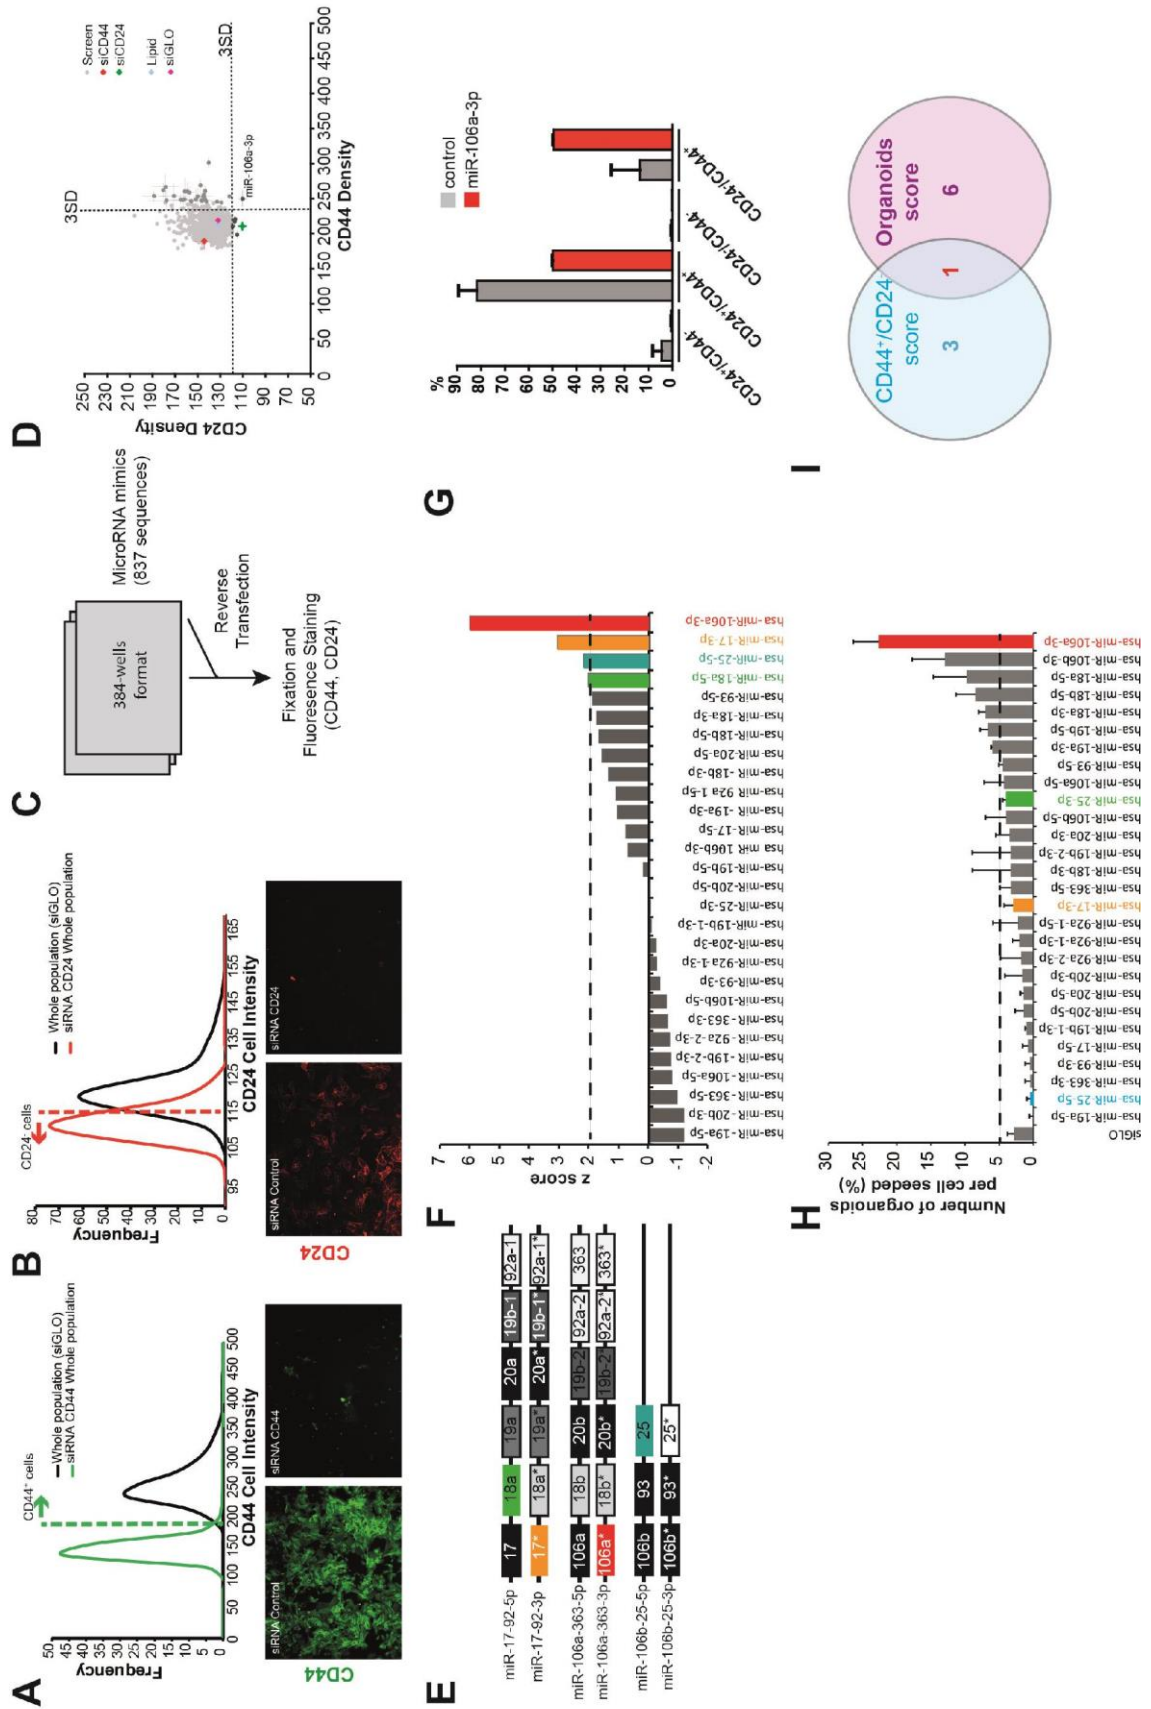

597

598

599 **Figure 2. Identification of miR-106a-3p as the predominant miRNA in cells growing in**  
600 **3D**

601 **A**, Frequency distributions of CD44 intensity in HMECs at P6 (whole population, siGLO) as  
602 compared to HMEC-CD44-siRNA-depleted cells. Bottom panels are representative  
603 immunofluorescence pictures of HMECs stained with CD44 antibody (green) as compared to  
604 HMEC-CD44-siRNA- depleted cells. **B**, Frequency distributions of CD24 intensity in  
605 HMECs at P6 (whole population, siGLO) as compared to HMEC-CD24-siRNA-depleted  
606 cells. Bottom panels are representative immunofluorescence pictures of HMECs stained with  
607 CD24 antibody (red) as compared to HMEC-CD24-siRNA-depleted cells. **C**, Workflow for  
608 image-based screening of miRNA screening for CD44<sup>high</sup>/CD24<sup>low</sup> enhancers in primary  
609 human HMECs. HMECs were plated in 384-well plates and subjected to HTS of the miRNA  
610 libraries using optimized immunofluorescence staining for CD44 and CD24. **D**, Screening  
611 dot-plot showing the relationship between CD44 and CD24 intensity. Based on the frequency  
612 distributions generated for each of phenotypic criteria (CD44 and CD24 intensity levels), we  
613 assigned highly stringent cutoffs for scoring positive hits in the genome-wide screen (dashed  
614 lines, 3SD from the siGLO negative control). **E**, Members of the miR-17/92 cluster and its  
615 two paralogues miR-106a/363 and miR-106b/25. Red: miR-106a-3p; blue: miR-25-5p; green:  
616 miR-18-5p; orange: miR-17-3p. **F**, HMECs were transfected with miRNA mimics of the miR-  
617 17/92 cluster and its two paralogues and screened using conditions identical to the full screen.  
618 Z-Scores were calculated for individual miRNA mimics and plotted according to rank order.  
619 Dashed lines indicate 2 standard deviations above the mean of the distribution. In colors are  
620 the miRNA above the 2SD. **G**, The graph shows mean of the percent of CD44/CD24  
621 subpopulations with  $\pm$  SEM of at least three independent sorting experiments in HMEC  
622 transfected with miR-106a-3p mimic as compared to control. **H**, The bar graphs show the  
623 mean number of organoids per well for each miRNA transfected in HMECs as compared to  
624 cells transfected with siRNA control. **I**, Venn diagram depicting the overlap of miRNA  
625 scoring in common between the CD44<sup>high</sup>/CD24<sup>low</sup> and organoids scores. Note that the  
626 overall number of miRNAs in common would be the overlap of the intersect of these two  
627 Venn diagrams.

628

Figure 3

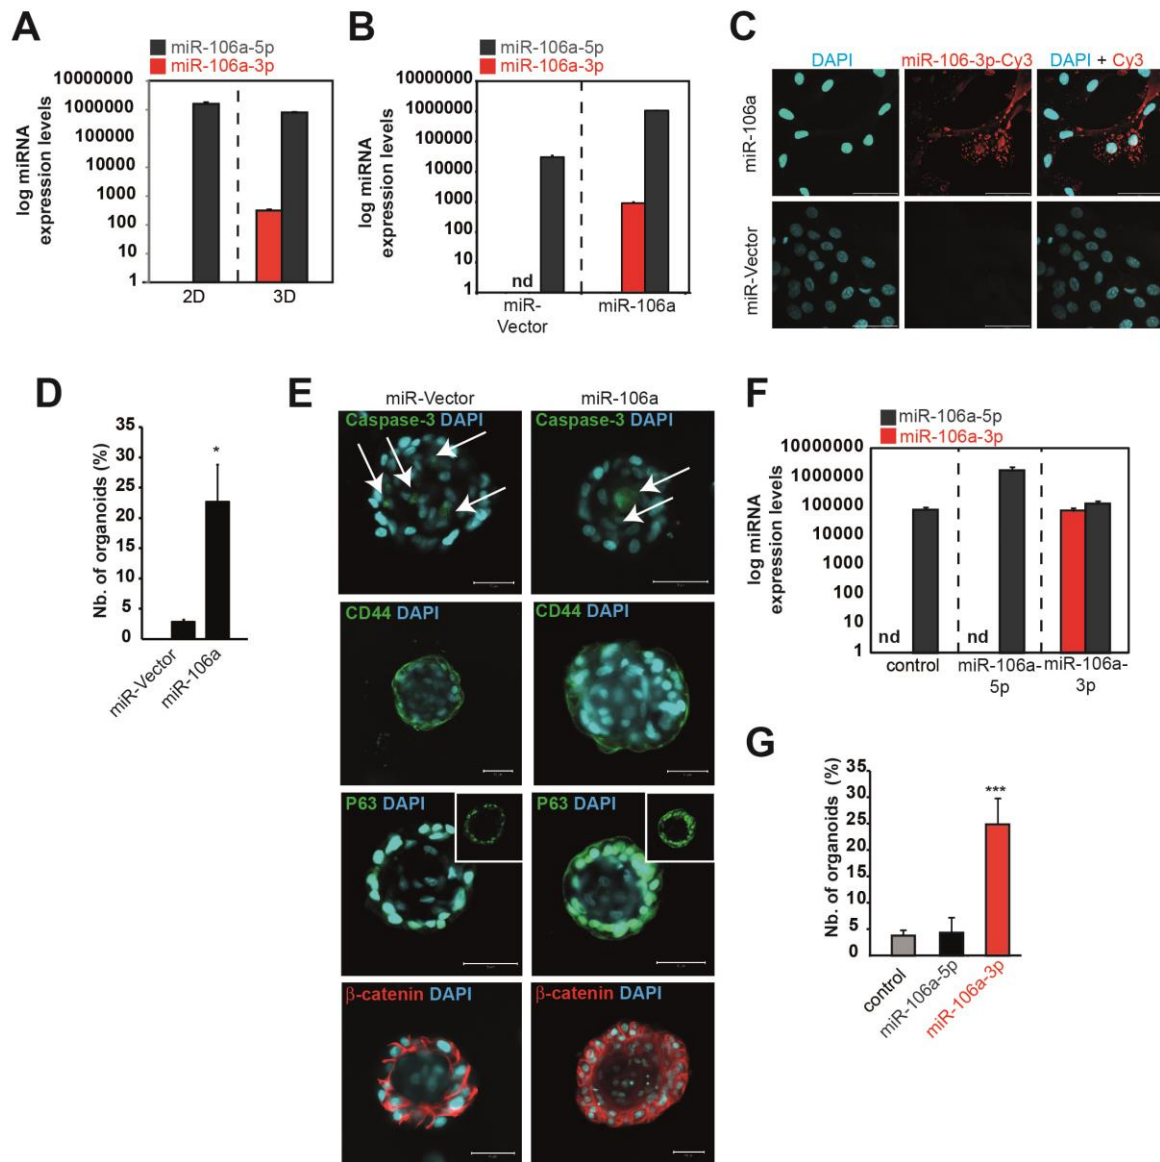

629

630 **Figure 3. Properties of miR-106a-3p**

631 **A**, Relative miR-106a-3p and miR-106a-5p expression levels determined by RT-qPCR in  
632 HMECs grown in 2D as compared to 3D-culture. **B**, Relative miR-106a-3p and miR-106a-5p  
633 expression levels determined by RT-qPCR in stable cell lines obtained by retroviral infection  
634 of HMECs with miR-Vector or miR-106a. **C**, FISH detection of miR-106a-3p in HMEC-  
635 miR106a stable cell lines. MiR-106a-3p positive signals are visualized in red. Scale bar: 50  
636 μm. **D**, The bar graphs show the mean number of organoids per well for miR-106a transfected  
637 HMECs as compared to cells transfected with miR-Vector. Statistical significance by  
638 Student's t test is indicated by one (p < 0.05), two (p < 0.01), or three (p < 0.001) asterisks. **E**,  
639 Confocal cross-sections of stable HMEC-miR106a organoids as compared to miR-Vector  
640 organoids stained with respectively active Caspase-3, CD44, P63 or β-catenin, and DAPI

641 (blue) for nucleus. The arrows indicate apoptotic cells. Scale bars, 50  $\mu$ m. **F**, Relative miR-  
642 106a-3p and miR-106a-5p expression levels determined by RT-qPCR in HMEC transfected  
643 with either control mimic, miR106a-5p or miR106a-3p. n.d. means not detectable. **G**,  
644 Percentage of organoids formed by cells seeded for HMEC transfected with either control  
645 mimic, or miR106a-5p or miR106a-3p. Statistical significance by Student's t test is indicated  
646 by one ( $p < 0.05$ ), two ( $p < 0.01$ ), or three ( $p < 0.001$ ) asterisks.

647

648

Figure 4

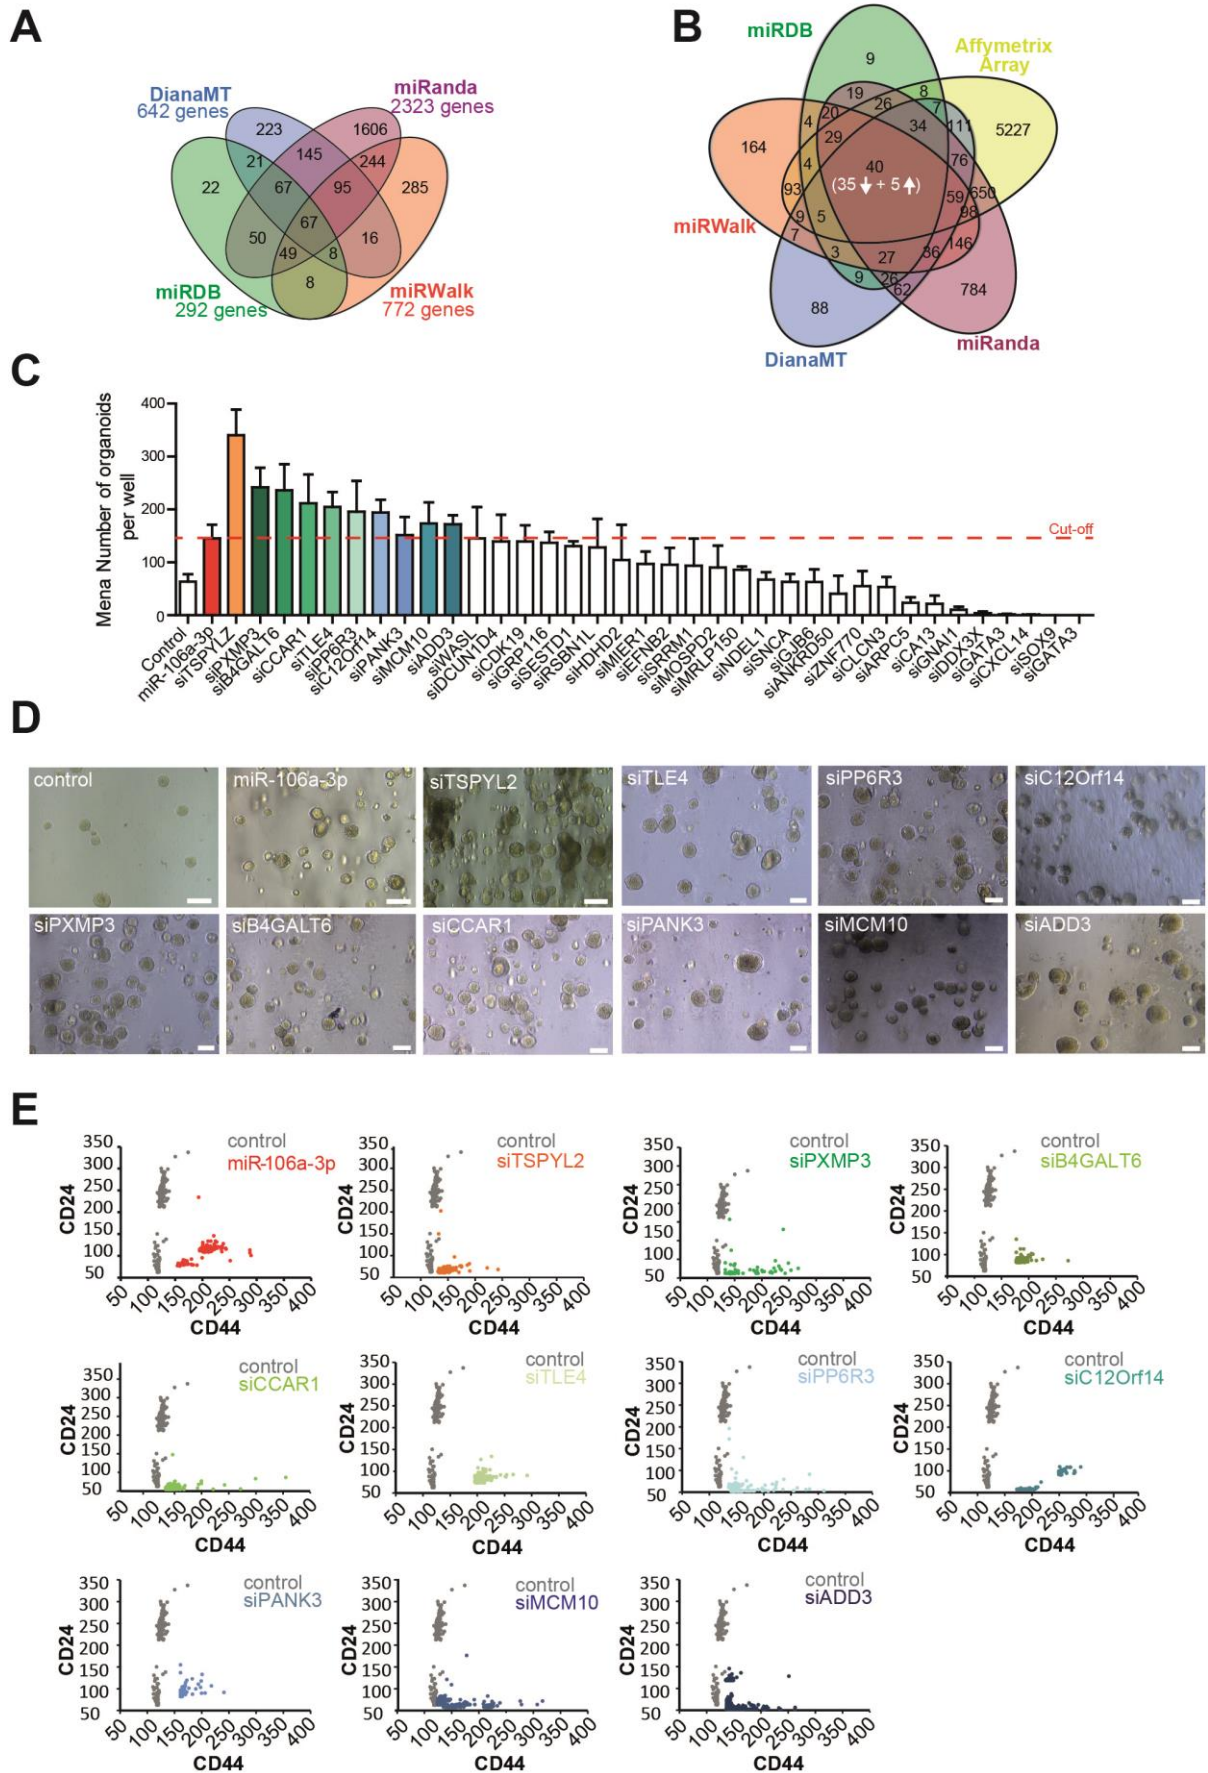

650 **Figure 4. Identification and validation of miR-106a-3p targets**

651 **A**, Venn diagram showing the distribution of the computed miR-106a-3p targets identified  
652 through 4 algorithms DianaMT, miRanda, miRDB and miRWalk. **B**, Venn diagram showing  
653 the overlap between the computed miR-106a-3p targets from (A) and Affymetrix expression  
654 profiling array. Among all genes expressed in HMEC-miR106a-3p-transfected cells, 35 were  
655 both predicted miR-106a-3p targets and downregulated as revealed by Affymetrix array. **C**,  
656 The bar graph shows the mean of organoids per well (mean  $\pm$  SEM.) in siRNA-transfected  
657 cells, three independent experiments for siRNA **D**, Representative brightfield pictures of  
658 organoids per well grown in 3D in siRNA-transfected cells. **E**, Scatter plots of CD44/CD24  
659 intensity in normal HMEC transfected with miR-106a-3p (red); and each siRNA - potential  
660 targets of miR-106a-3p.

661

662

663

Figure 5

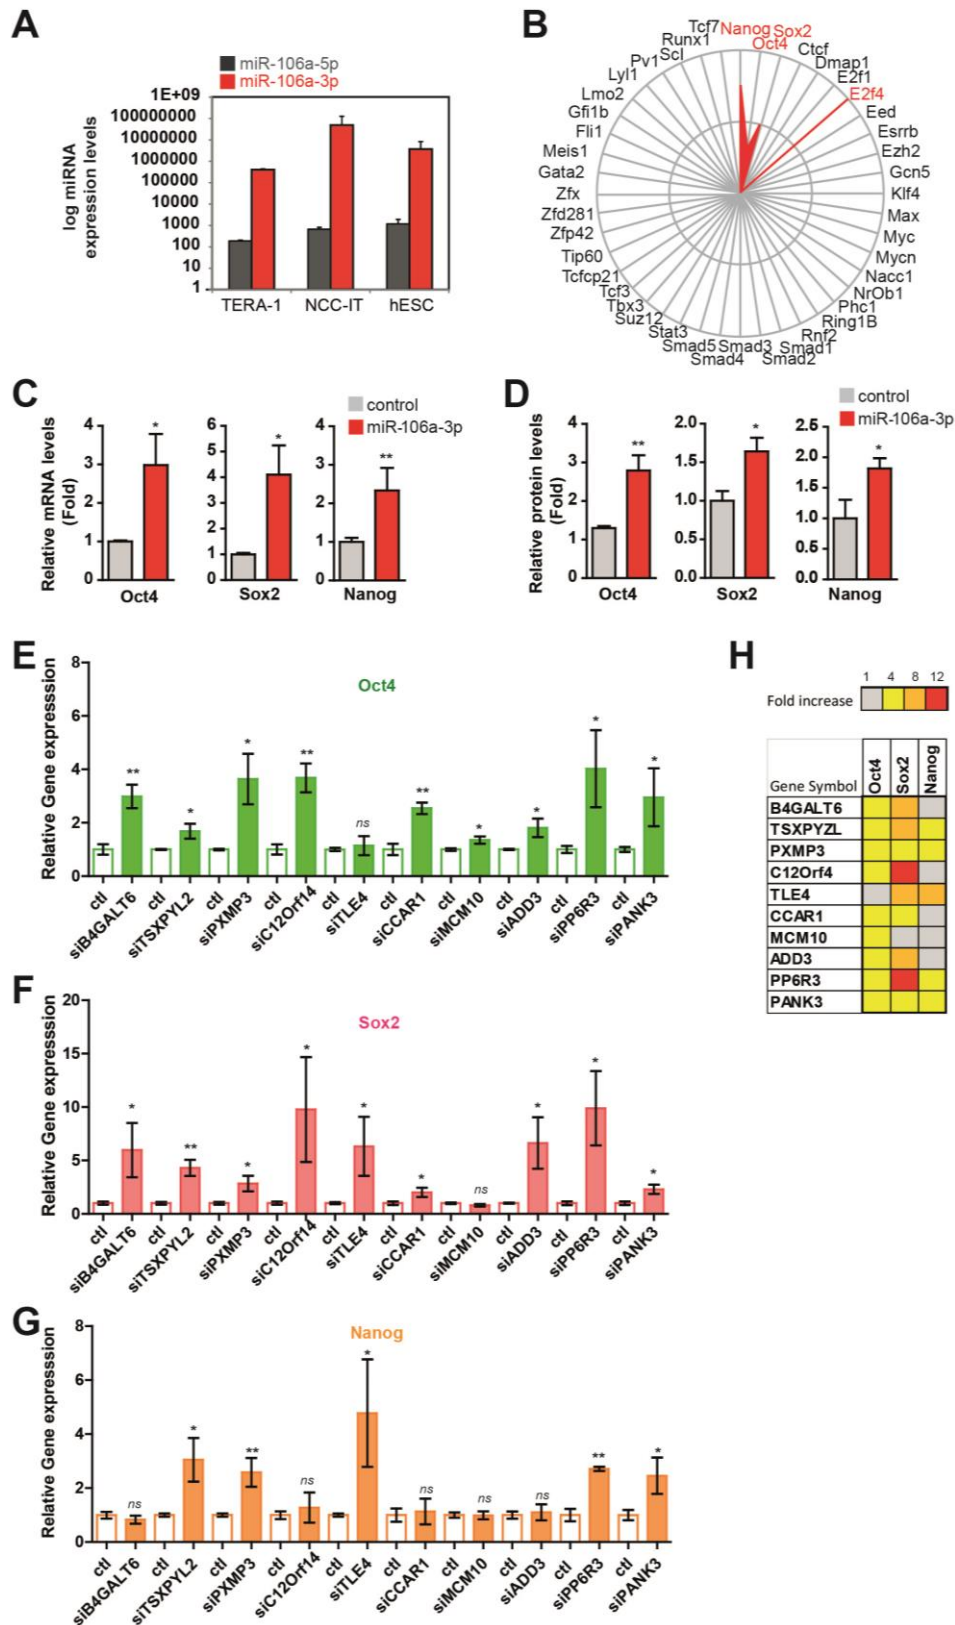

664

665 **Figure 5. miR-106a-3p targets regulate pluripotency master regulators**

666 **A**, Relative miR-106a-3p and miR-106a-5p expression levels determined by RT-qPCR in  
 667 TERA-1, NCCIT and hESCs. **B**, The graph displayed the overlap significance and the overlap



668 percentage of the input gene lists with the sets of Transcription Factors (TF) target genes  
669 determined by CHIP-chip and CHIP-Seq studies. Each spoke represents the merged set of  
670 target genes for a specific TF. The radar chart shows that a high percentage of the input genes  
671 are known targets of the pluripotency master regulators (Nanog, Sox2, Oct4 and E2f4). **C**,  
672 RT-qPCR measurements of the mRNA levels of key regulators of pluripotency in HMEC  
673 transfected with control mimic or miR106a-3p. **D**, Relative protein expression levels of key  
674 regulators of pluripotency in HMEC transfected with control mimic or miR106a-3p. **E**, RT-  
675 qPCR analysis of OCT4 levels in siRNA-transfected cells (n = 3 independent transfection  
676 experiments). The data are shown relative to the control samples transfected with nontargeting  
677 “scrambled” RNAi sequence. **F**, RT-qPCR analysis of SOX2 levels in siRNA-transfected  
678 cells (n = 3 independent transfection experiments). The data are shown relative to the control  
679 samples transfected with nontargeting “scrambled” RNAi sequence. **G**, RT-qPCR analysis of  
680 NANOG levels in siRNA-transfected cells (n = 3 independent transfection experiments). The  
681 data are shown relative to the control samples transfected with nontargeting “scrambled”  
682 RNAi sequence. In all graphs, means and standard errors are shown, and statistical  
683 significance by Student's t test is indicated by one (p < 0.05), two (p < 0.01), or three (p <  
684 0.001) asterisks. **H**, Top, Color code used to illustrate the number of fold increase of the  
685 experimental siRNA value from the siRNA control in the RT-qPCR experiments. Bottom,  
686 Heat maps of the fold increase scores for each gene (Oct4, Sox2, Nanog) following  
687 transfection with the respective siRNAs.

688

689

## Figure 6

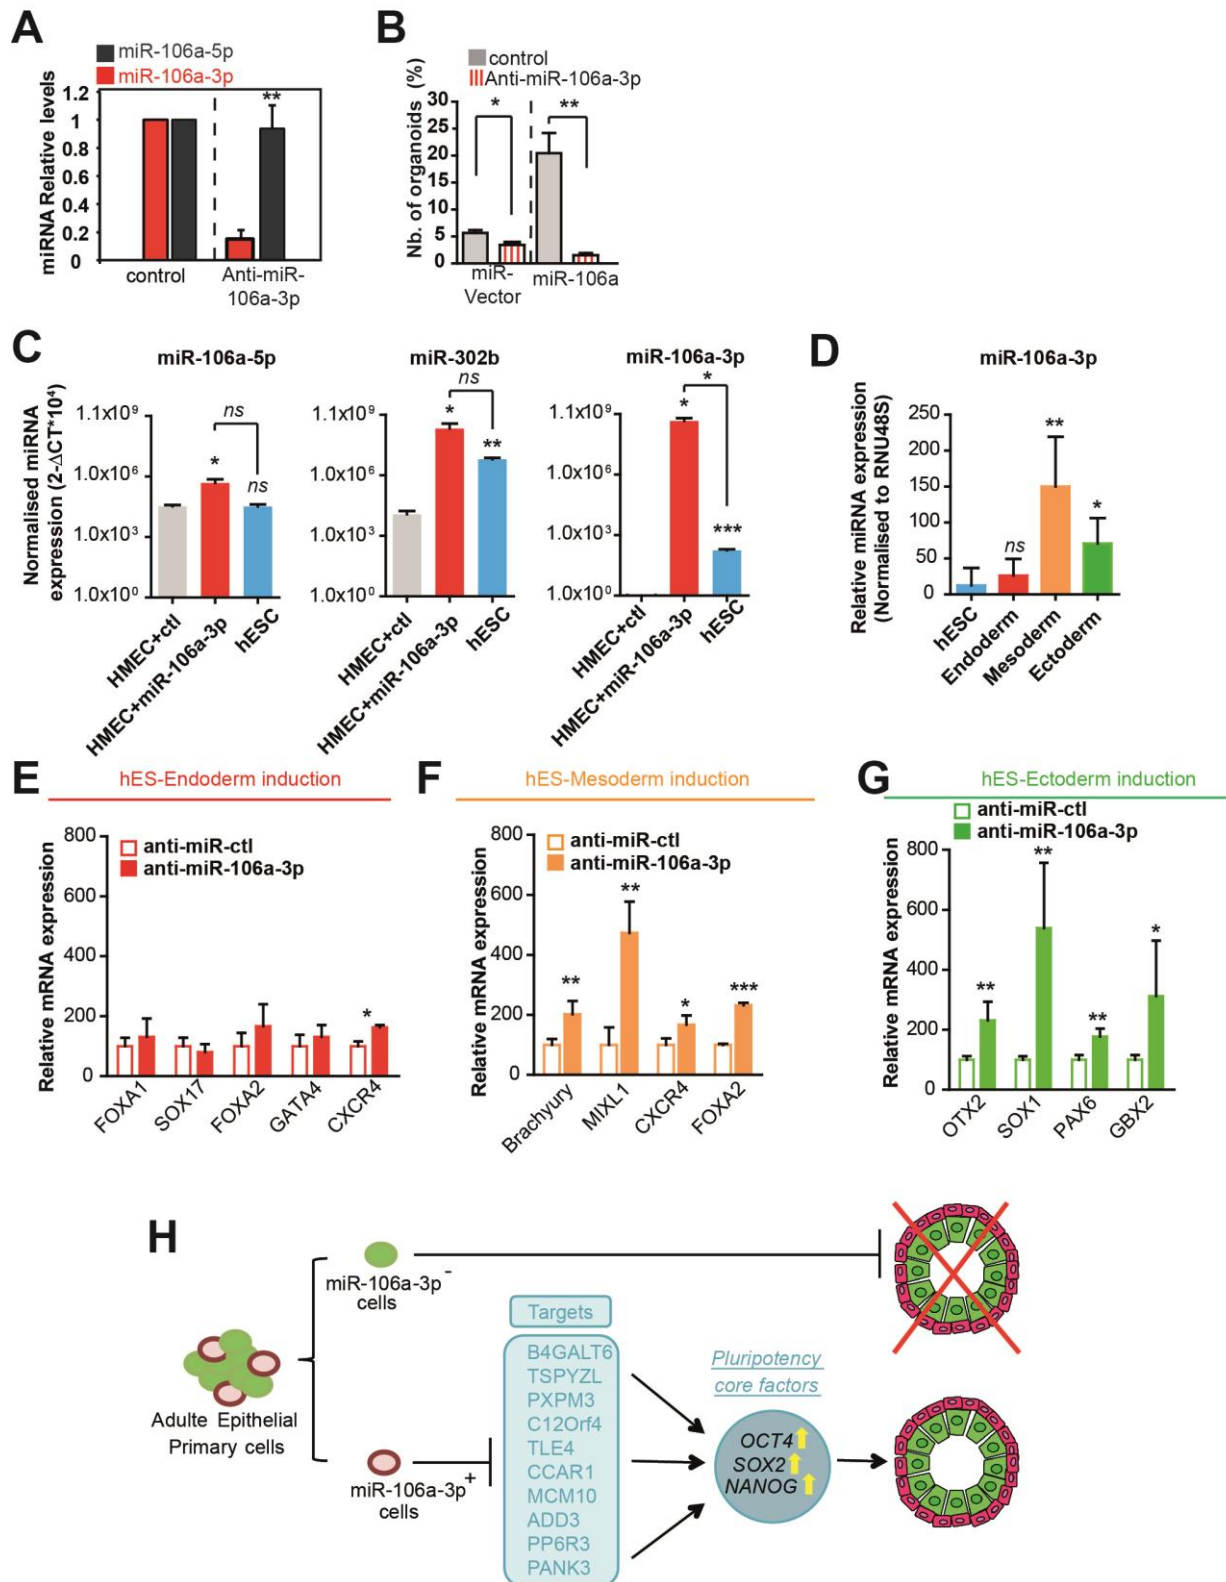

690

### 691 **Figure 6. miR-106a-3p, a stem cell determinant for organoids and development**

692 **A**, miR106a-3p expression levels (measured by RT-qPCR and normalized to RNA48)  
 693 following miR-106a-infected HMEC cell transfection with LNA-control (left) or LNA-anti-  
 694 miR-106a-3p (right). **B**, Percentage of organoids per cell seeded formed by miR-106a-

695 infected HMEC cells transfected with LNA-control (left) or LNA-anti-miR-106a-3p (right).  
696 **C**, Relative miR-106a-5p, miR-302b and miR-106a-3p expression levels determined by RT-  
697 qPCR in HMEC transfected with either control mimic or miR106a-3p, as compared to hESCs  
698 cells. In all graphs, means and standard errors are shown, and statistical significance by  
699 Student's t test is indicated by one ( $p < 0.05$ ), two ( $p < 0.01$ ), or three ( $p < 0.001$ ) asterisks. **D**,  
700 Relative endogenous miR-106a-3p expression levels determined by RT-qPCR in hESCs cells  
701 following the 3 germ layer induction. In all graphs, means and standard errors are shown, and  
702 statistical significance by Student's t test is indicated by one ( $p < 0.05$ ), two ( $p < 0.01$ ), or  
703 three ( $p < 0.001$ ) asterisks. **E**, Relative mRNA expression levels of differentiation target genes  
704 in hESCs transfected with control mimic or anti-miR106a-3p following Endoderm induction.  
705 In all graphs, means and standard errors are shown, and statistical significance by Student's t  
706 test is indicated by one ( $p < 0.05$ ), two ( $p < 0.01$ ), or three ( $p < 0.001$ ) asterisks. **F**, Relative  
707 mRNA expression levels of differentiation target genes in hESCs transfected with control  
708 mimic or anti-miR106a-3p following Mesoderm induction. In all graphs, means and standard  
709 errors are shown, and statistical significance by Student's t test is indicated by one ( $p < 0.05$ ),  
710 two ( $p < 0.01$ ), or three ( $p < 0.001$ ) asterisks. **G**, Relative mRNA expression levels of  
711 differentiation target genes in hESCs transfected with control mimic or anti-miR106a-3p  
712 following Ectoderm induction. In all graphs, means and standard errors are shown, and  
713 statistical significance by Student's t test is indicated by one ( $p < 0.05$ ), two ( $p < 0.01$ ), or  
714 three ( $p < 0.001$ ) asterisks. **H**, Schematic representation of the mechanism of organogenesis  
715 initiated by miR-106a-3p.

716

717

718

719

Supp. Figure 1

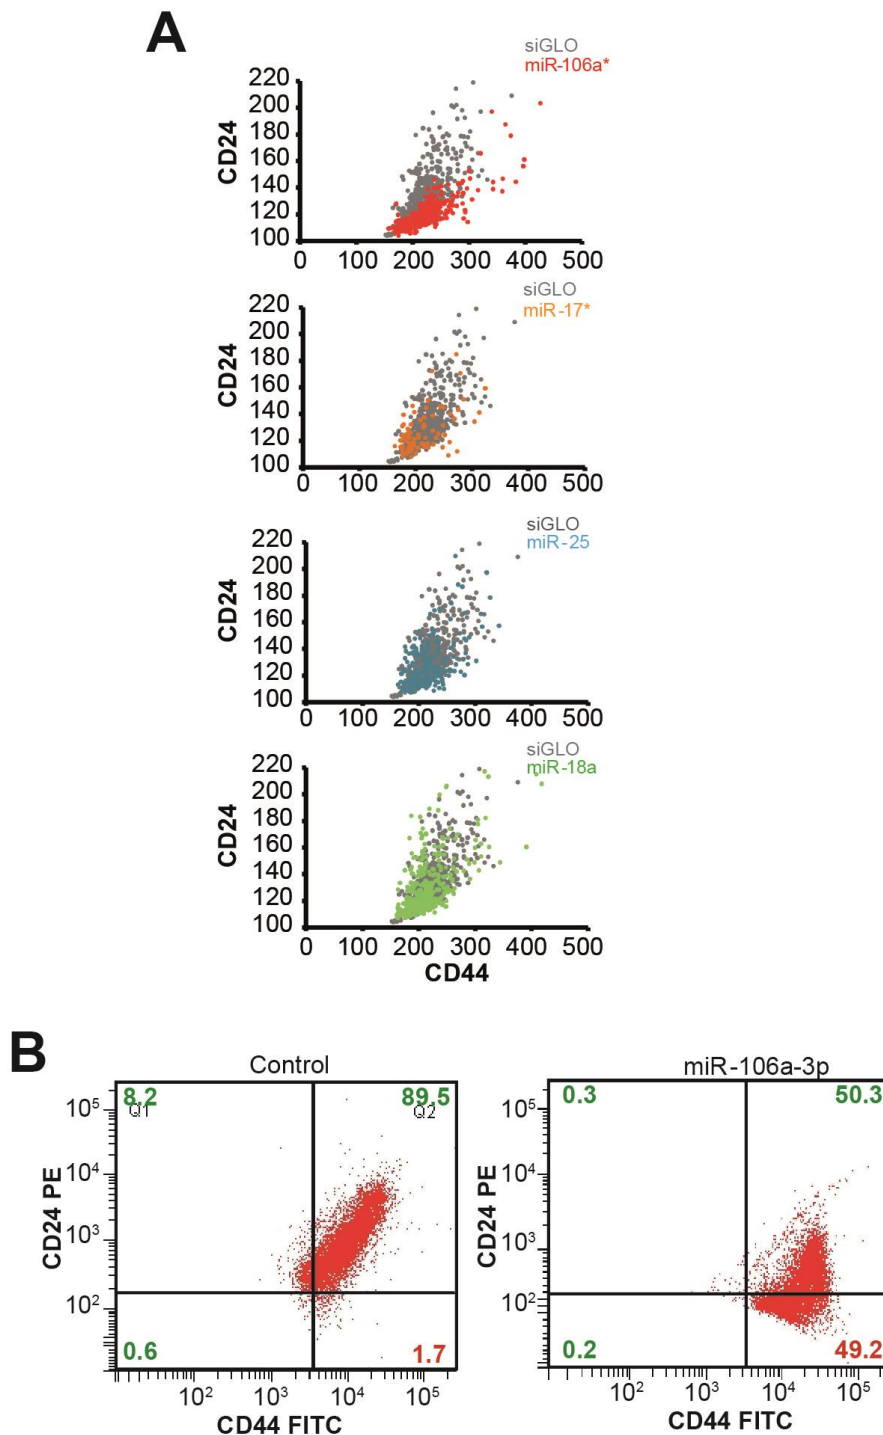

720

721 **Figure S1**

722 A, Representative levels of expression of CD24 and CD44 markers following transient  
723 transfection of either control mimic or miR106a-3p measured by FACS. B, Scatter plots of  
724 CD44/CD24 intensity in normal HMEC transfected with miR-106a-3p (red); miR-17-3p  
725 (orange); miR-25-5p (blue); and miR-18-5p (green).

726

## Supp. Figure 2

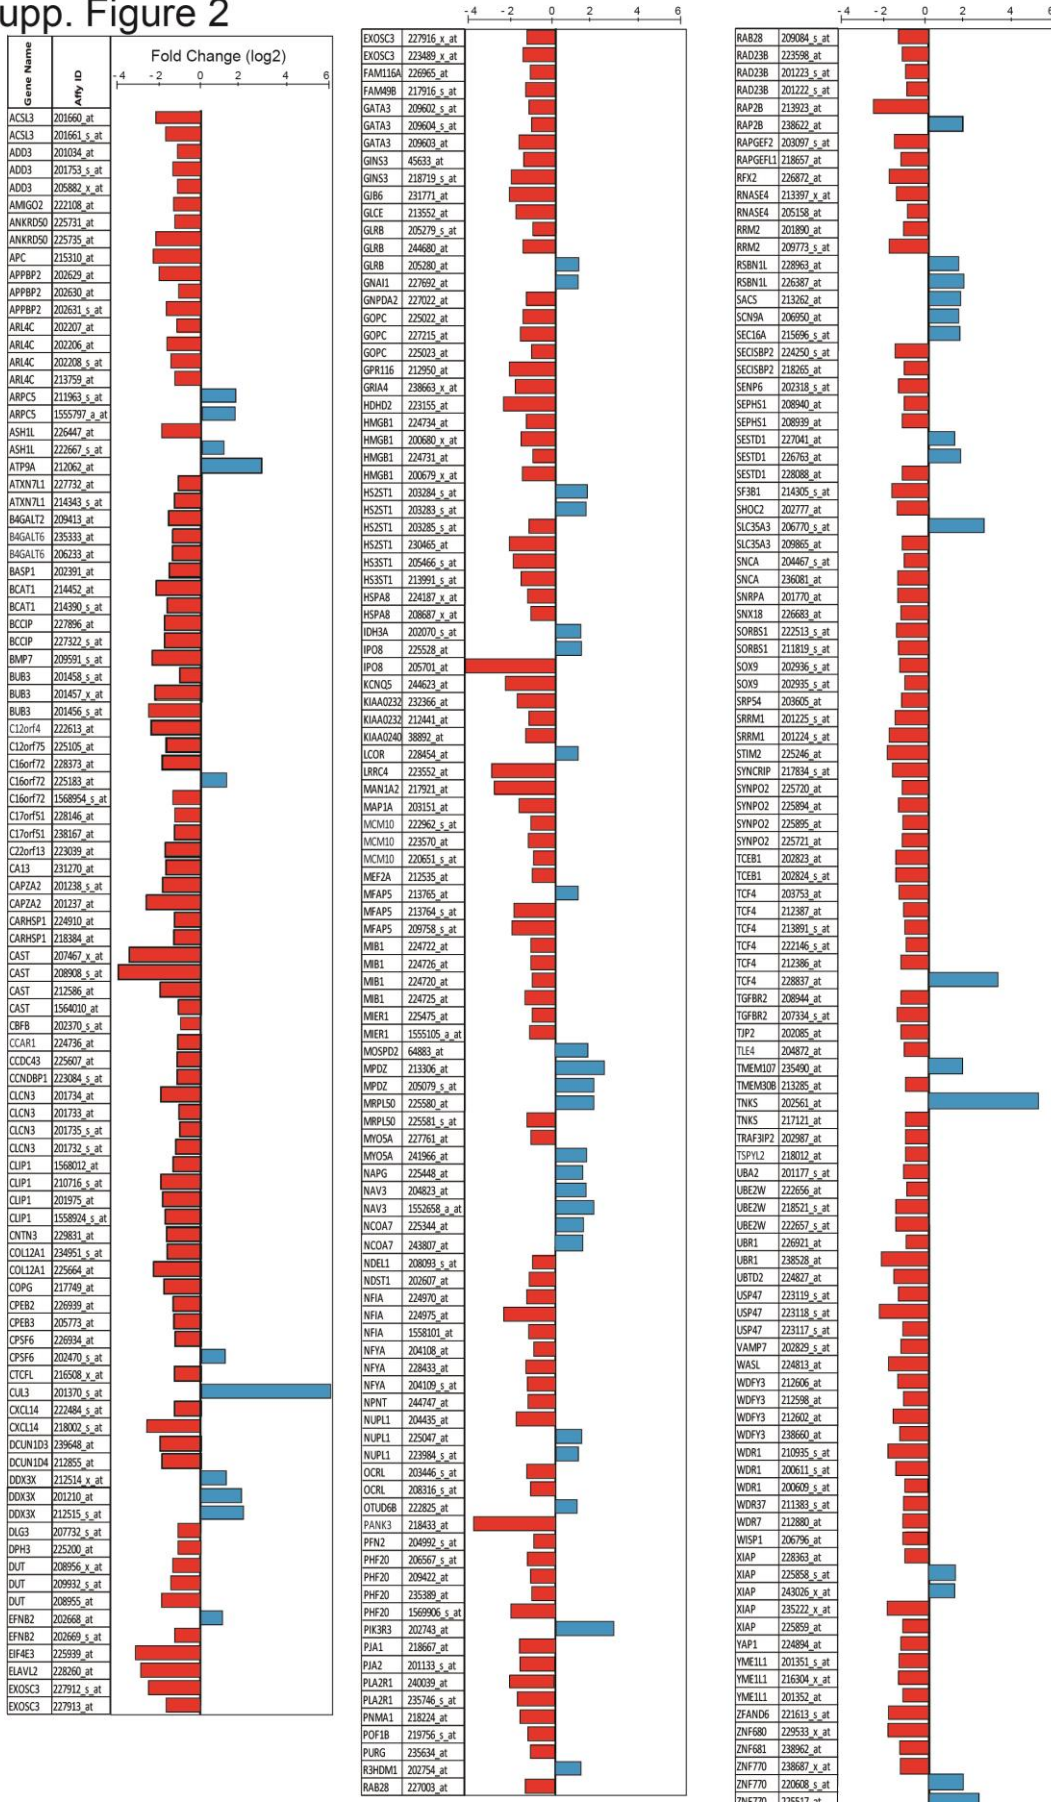

728 **Figure S2**

729 The figure shows normalized expression ratio for the 40 genes targets identified by  
730 combining computational target prediction miRNA algorithm with Affymetrix expression  
731 profiling array ( $\text{Log}_2$  fold change) in miR-106a-3p-transfected cells ( $*P \leq 0.05$ ) for each  
732 Affymetrix probe. Positive or negative mean values indicate induction or repression of gene  
733 expression respectively ( $P \leq 0.05$ ).

734

## Supp. Figure 3

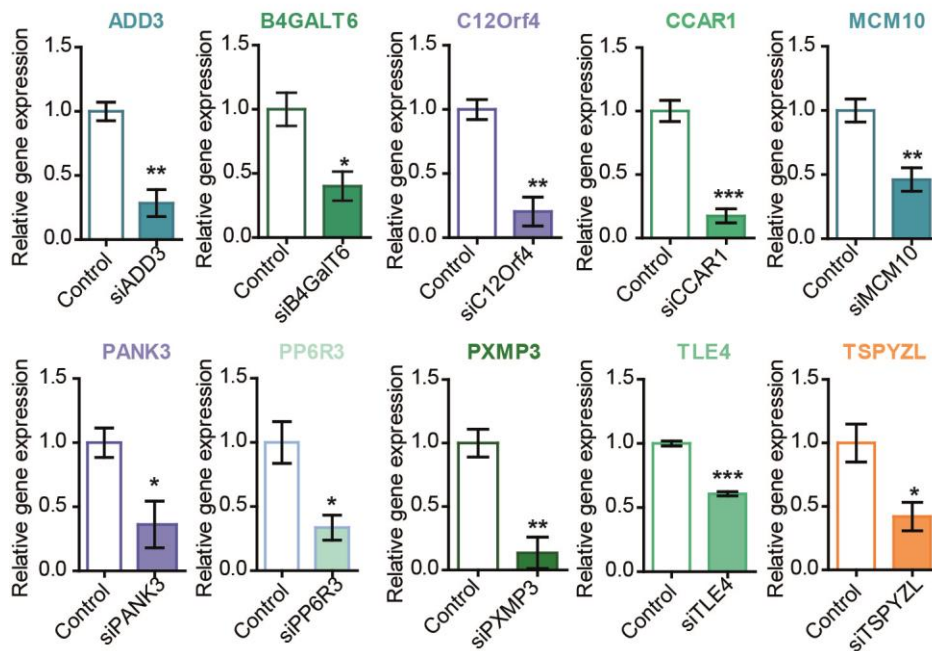

735

### 736 **Figure S3**

737 Efficiency of Gene Silencing. Verification of the efficiency of gene(s) silencing with specific  
738 human siRNA in HMEC cells. Means and standard errors are shown and statistical  
739 significance by Student's t test is indicated by one (p < 0.05), two (p < 0.01), or three (p <  
740 0.001) asterisks.

741

742

Supp. Figure 4

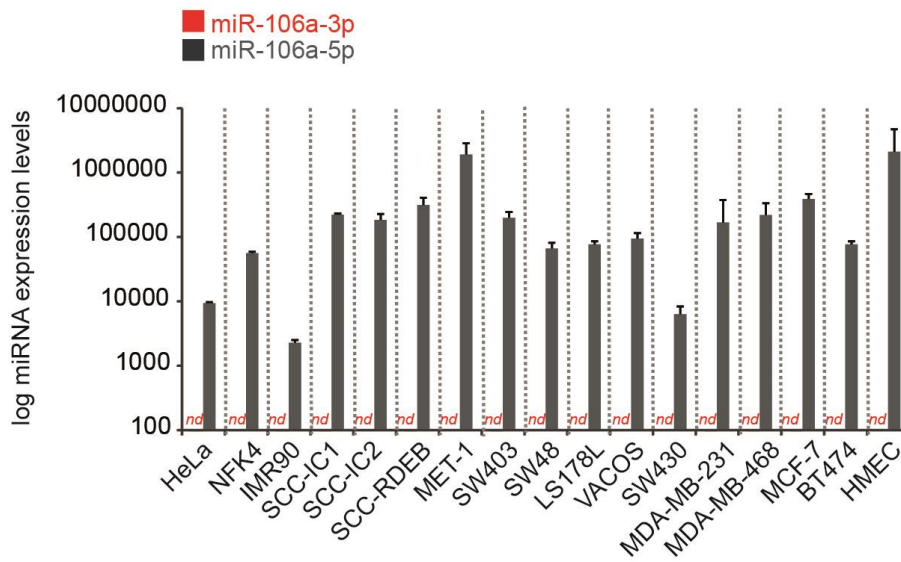

743

744 **Figure S4**

745 Relative miR-106a-3p and miR-106a-5p expression levels determined by RT-qPCR in a panel  
746 of 17 cell lines. *Nd* indicates not detectable. Means and standard errors are shown.

747

748

749



Supp. Figure 5

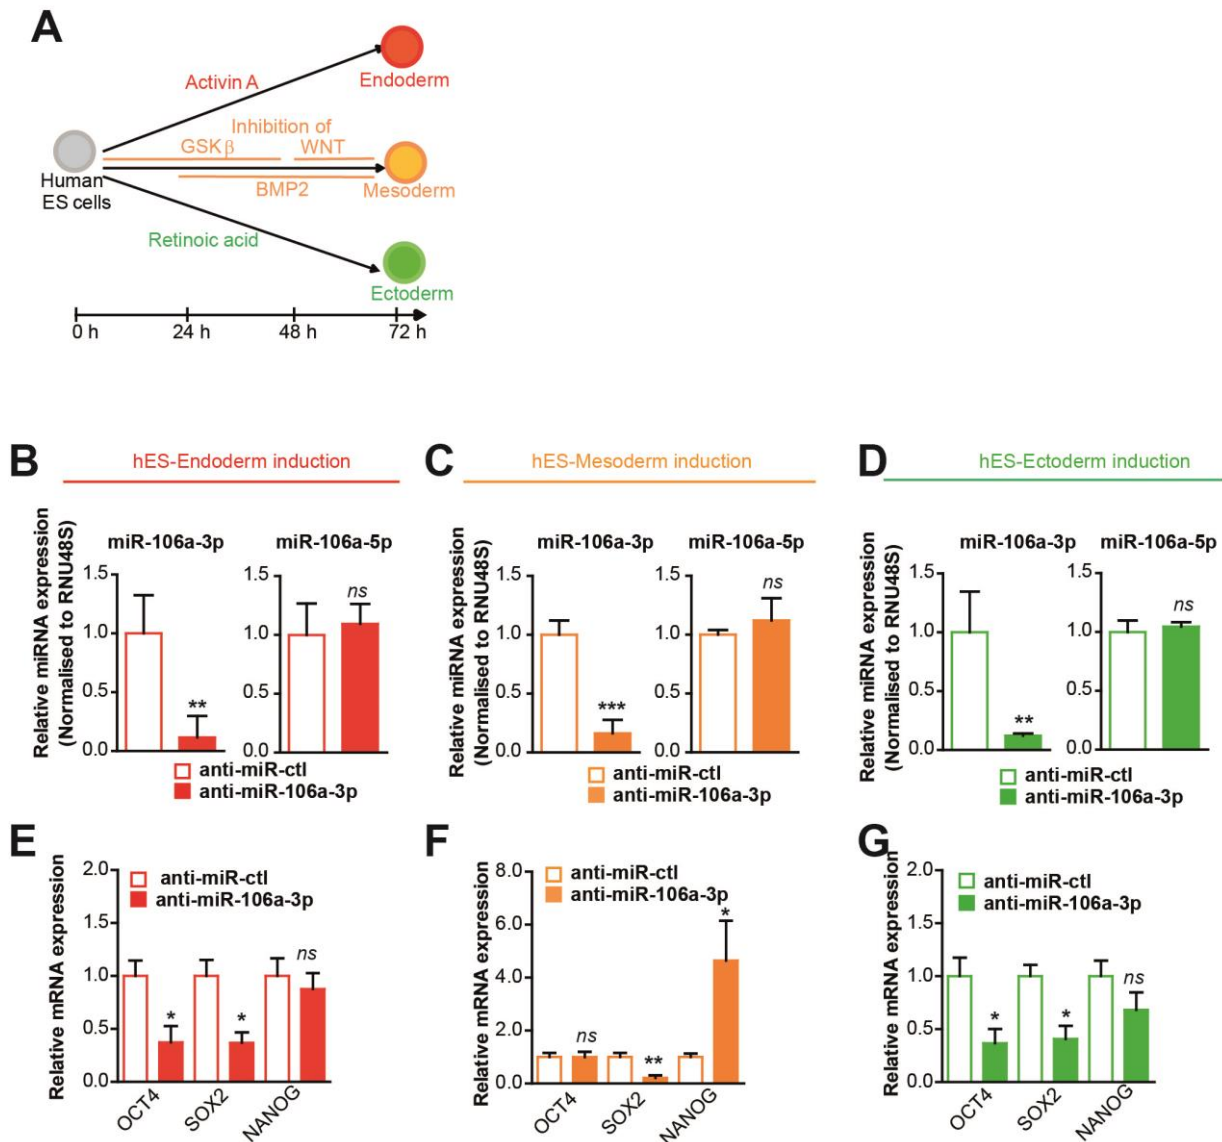

750

751 **Figure S5**

752 **A**, Schematic of the human ES cell differentiation system including timeline and key  
 753 signaling pathways that are modulated. **B-D**, Relative miR-106a-3p and miR-106a-5p  
 754 expression levels determined by RT-qPCR in hESCs cells transfected with control mimic or  
 755 anti-miR-106a-3p following induction of the Endoderm (B), Mesoderm (C) and Ectoderm (D)  
 756 differentiation. **E-G**, Relative mRNA expression levels of key regulators of pluripotency in  
 757 hESCs transfected with control mimic or anti-miR106a-3p following induction of Endoderm  
 758 (E), Mesoderm (F) and Ectoderm (G) differentiation. In all graphs, means and standard errors  
 759 are shown, and statistical significance by Student's t test is indicated by one (p < 0.05), two (p  
 760 < 0.01), or three (p < 0.001) asterisks.

761
