1

2

3

4

## A miRNA screen identifies a transcriptional program controlling adult stem cell maintenance in mammary organoids

6

7

8

9 Delom F<sup>1</sup>, Vlachavas E<sup>2,3</sup>, Lemaître G<sup>4</sup>, Robert J<sup>1</sup>, Chatziioannou A<sup>3,5</sup>, Puceat M<sup>6</sup>, and  
10 Fessart D<sup>1\*</sup>

11

12 <sup>1</sup> ARTiSt, Univ. Bordeaux, INSERM U1312, F-33000 Bordeaux, France;

13 <sup>2</sup> Division of Molecular Genome Analysis (B050), German Cancer Research Center (DKFZ),  
14 Im Neuenheimer Feld 280, 69120 Heidelberg, Germany

15 <sup>3</sup> e-NIOS PC, Kallithea-Athens, Greece

16 <sup>4</sup> Laboratoire de Génomique et Radiobiologie de la Kératinopoïèse, CEA/DRF/IBFJ/IRCM,  
17 Evry; Université Evry / Université Paris-Saclay, France.

18 <sup>5</sup> Centre of Systems Biology, Biomedical Research Foundation of the Academy of Athens, 4  
19 Soranou Ephessiou Street, 11527, Athens, Greece

20 <sup>6</sup> Université Aix-Marseille, INSERM UMR\_1251, F-13385 Marseille, France.

21

22 **Corresponding author: DF - E-mail: [delphine.fessart@inserm.fr](mailto:delphine.fessart@inserm.fr)**

23

24 **Abstract**

25 Organoids development relies on the self-organizing properties of adult stem cells to create structures  
26 which recapitulate the architecture, functionality, and genetic signature observed in original tissues.  
27 Little is known about of the exact nature of the intrinsic cell properties at the origin of organoid  
28 generation, and of the signaling pathways governing their plasticity and differentiation. Herein, we  
29 carried out a microRNA screen to functionally track adult stem cell from human mammary organoids  
30 epithelial cell culture. We uncover miR-106a-3p that enrich adult stem cell-like lineage, defined by  
31 CD44 and CD24 expression, and promotes organoids expansion. Transcriptomic analysis reveal that  
32 this miRNA acts through the regulation of a set of regulators of transcription *REST*, *CBFB* and *NF-*  
33 *YA*, and thus strengthening the adult stem cell maintenance of human mammary epithelial cells. These  
34 data demonstrate that organoids can be directly generated from human epithelial cells by only one  
35 miRNA: miR-106a-3p. Hence, we reveal that a transcriptional program is clearly in place to elicit  
36 adult stem cells maintenance during mammary organoids development.

37

## 38 **Introduction**

39           Three-dimensional (3D) human organoid culture models are appealing tools to study  
40 pathophysiological processes. These models have been described, by us and others, for lung<sup>1,2</sup>  
41 as well as for numerous other organs.<sup>3</sup> The term “organoid” literally means organ-like,  
42 reflecting the ability of organoid culture conditions to prompt cells to self-organize into  
43 structures mimicking the architecture of the organ from which they derive. In contrast to  
44 organ explants, organoids can arise from a single primary cell,<sup>1, 2, 4</sup> thereby allowing the  
45 generation of human organoids from biopsies<sup>1</sup>. Non-tumor organoids are thought to arise from  
46 adult stem cells (aSCs), and therefore should in theory be capable of self-renewal and  
47 differentiation. However, there is currently a lack of understanding of the underlying  
48 epigenetic and genetic mechanisms that control organoid initiation, the maintenance of stem-  
49 cell and differentiation during organogenesis.

50           aSCs are highly specialized cells that can develop into more than one cell type, but  
51 can only produce the tissue in which they reside: as such, they are considered as ‘multipotent’,  
52 which corresponds to less polyvalence than pluripotent cells. Indeed, pluripotent cells are  
53 embryonic stem cells (ESC) and can give rise to all cell types. Consistent with this idea,  
54 primary cell populations enriched with known progenitor/stem cell markers are more efficient  
55 at forming organoids than the general cell populations.<sup>5</sup> The development of breast stem cells  
56 as well as their enrichment may rely on the orchestration of multiple critical transcription  
57 processes. Interestingly, increasing amounts of data show that the same molecular pathways  
58 manage self-renewal of normal stem cells and that of Cancer Stem Cells (CSCs) in tumors.<sup>6</sup>  
59 CSCs have been shown to express members of the Embryonic Stem Cells (ESC) core  
60 pluripotency complex, including octamer-binding transcription factor-4 (OCT4), SRY-Box  
61 Transcription Factor 2 (SOX2) and NANOG, which are positively correlated with the  
62 development of CSCs.<sup>7, 8, 9, 10, 11, 12</sup> The expression of OCT3/4 has been reported in  
63 differentiated normal and malignant human cells,<sup>13</sup> that of SOX2 in several malignant  
64 tissues<sup>14</sup> and that of NANOG in human neoplasms, including germ cell tumors, breast  
65 carcinoma, and osteosarcoma.<sup>15</sup> In addition, there is evidence that SOX2 is expressed in  
66 tumor-spheres, which can be generated from breast cancer tumors and cell lines.<sup>16</sup> These  
67 observations suggest that adult breast stem cells may contain cells with reminiscent properties  
68 of embryonic-like stem cells.<sup>15, 17</sup> So far, it is not known whether a comparable molecular  
69 signature of stemness — such as a minimal core transcriptional program — might be shared  
70 in adult stem cells.

71 In order to better understand mammalian development, as well as exploit the  
72 tremendous therapeutic potential of organoid models, it is necessary to identify and  
73 characterize the epigenetic and genetic mechanisms governing the fate of aSCs. MicroRNAs  
74 (miRNAs) have been shown to play an important role in regulating stem cell self-renewal and  
75 differentiation.<sup>18</sup> In general, one gene can be repressed by multiple miRNAs and one miRNA  
76 may repress multiple target genes, which results in the formation of complex regulatory  
77 networks. In a wide variety of developmental processes, miRNAs finely tune cellular  
78 identities by targeting important transcription factors of key pathways.<sup>19</sup> Hence, we sought to  
79 functionally investigate the contribution of miRNA-mediated gene regulation in the  
80 maintenance of adult stem cell-like lineage. This would allow to identify better the  
81 mechanisms responsible for controlling the cell-initiating subpopulation and improve tissue-  
82 specific organoid growth conditions. Since organoids derive from single stem cells, we  
83 performed a functional miRNA screen of human primary epithelial cells to identify the key  
84 factors in aSCs-derived organoids formation and expansion. In this study, we identified an  
85 uncharacterized miRNA, miR-106a-3p, together with its target genes that play a key role in  
86 such processes. Transcriptomic profiling of miR-106a-3p-transduced cells revealed genetic  
87 programs overlapping with those of other stem and progenitor cells, showing common  
88 features with ESC-like cells or some intermediate cellular states. Thus, using a gain-of-  
89 function approach, we discovered that the endogenous levels of three core transcription  
90 factors (OCT4, SOX2 and NANOG) were essential for generating organoids. Moreover, we  
91 identified the mechanism by which miR-106a-3p finely tunes the differentiation process  
92 through a set of transcription regulators (CBFB (Core-binding factor b), NF-YA (Nuclear  
93 Transcription Factor Y Subunit Alpha), REST (RE1 silencing transcription factor), and thus  
94 the maintenance of aSC-like lineage. Overall, our results highlight the importance of miR-  
95 106a-3p in the maintenance of mammary aSC-derived organoids and provide transcriptional  
96 mechanisms underlying organogenesis.

97

98

99 **Results**

100 *Organoid cultures of human mammary epithelial cells exhibit a CD44<sup>high</sup>/CD24<sup>low</sup>*  
101 *phenotype*

102 This study was initiated to identify organoid-forming epithelial cell subpopulations  
103 that specify stem/progenitor cell functions in epithelial cells.<sup>5</sup> Stem cells are rare immortal  
104 cells within a mass of cultured cells. When dividing, they can both self-renew and give rise to  
105 other cell types through asymmetric mitoses. Previously, it had been shown that human  
106 primary mammary epithelial cells (HMECs) represent a multipotent stem cell population  
107 initially present in the basal layer of the gland.<sup>20, 21, 22</sup> These cells are estrogen-independent  
108 (tamoxifen-resistant) and display heterogeneous expression of luminal and myoepithelial  
109 lineage markers.<sup>23</sup> First, we characterized the properties of 3D-grown HMECs compared to  
110 conventional 2D culture. Cells were grown under organoid culture conditions as we  
111 previously described<sup>1</sup> and the cells<sup>1</sup> tested formed 3D-structured human organoids (Figure  
112 1A). Approximately 3% of cells present in the culture featured the capacity to generate an  
113 organoid, suggesting the presence of stem cells within the mass culture. Next, the self-renewal  
114 capacity of organoid-initiating cells was assessed by serial organoid cultures to reflect adult  
115 stem cells maintenance from passage 5 to passage 11 (Figure 1B). Cells progressively lost  
116 self-renewal ability to form organoids upon serial propagation (Figure 1B), consistent with  
117 previously described loss of self-renewal potential of primary epithelial stem cells after a few  
118 passages.<sup>24</sup>

119 Previous studies have reported that HMECs with CD44<sup>high</sup>/CD24<sup>low</sup> phenotype have  
120 the highest progenitor ability compared to all other stem/progenitor cell subpopulations.<sup>25</sup> It  
121 has been shown also that this small cell subpopulation with the capacity of self-renewal and a  
122 high proliferation rate, originate from normal stem cells, and enhance sphere/organoid  
123 formation.<sup>26, 27, 28, 29</sup> Consequently, the CD44<sup>high</sup>/CD24<sup>low</sup> phenotype has been used as a  
124 reliable marker for the isolation of normal breast adult stem cells.<sup>30, 31, 32, 33</sup> In order to validate  
125 the generation of stem-like cells through 3D culture, flow cytometry was used to assess the  
126 expression of breast stem cell markers (CD44<sup>high</sup>/CD24<sup>low</sup>) in primary 3D-grown HMECs  
127 compared to conventional 2D culture (Figure 1C). In 2D cell culture, 85% of cells expressed  
128 both CD24 and CD44 at high levels (CD44<sup>high</sup>/CD24<sup>high</sup>) and 14% expressed the  
129 CD44<sup>high</sup>/CD24<sup>low</sup> phenotype (Figure 1C, top panel). In contrast, 3D cell cultures showed  
130 > 3-fold more CD44<sup>high</sup>/CD24<sup>low</sup> cells (~49%) (Figure 1C; lower panel, p = 0.0268, n = 3).

131 Together, these results indicate that cells grown as organoids acquired a CD44<sup>high</sup>/CD24<sup>low</sup>  
132 expression pattern similar to that of stem/progenitor cells, which suggests that 3D organoids  
133 can be used to enrich breast stem cell markers for further screening.

#### 134 *A miRNA screening approach to selectively enhance the generation of organoids*

135 To investigate whether miRNA-mediated gene regulation could enhance the organoid-  
136 forming ability, we designed a two-step functional screening strategy aiming at enrichment of  
137 the CD44<sup>high</sup>/CD24<sup>low</sup> cell population and at increasing the proportion of organoids-generating  
138 cells. We monitored, as a tool, the expression of CD44 and CD24 following miRNA  
139 transfection into HMEC cells (Figure 2A-D). Following the quantitative image analysis of  
140 >100,000 cells at Passage 6 (P6), frequency distribution of CD44 intensity was compared in  
141 mass cultured cells (whole population), and in cells transfected by CD44 (Figure 2A) or by  
142 CD24 siRNAs (Figure 2B). CD44 and CD24 levels were lower in siRNA-transfected cells in  
143 comparison to the original population, which validates the specificity of our assay (Figure 2A-  
144 B). To identify miRNAs that play a role in the enrichment in CD44<sup>high</sup>/CD24<sup>low</sup> cells, we  
145 performed an unbiased functional screen for miRNAs that modulate CD44/CD24 phenotypes  
146 in HMECs (Figure 2C). Using an approach similar to our genome-wide siRNA screen for p16  
147 modulators,<sup>34</sup> we transfected actively proliferating cells (Passage 6, P6) with a collection of  
148 837 miRNAs. siRNA-targeting siGLO ('cyclophilin B'; PPIB), CD44 or CD24 served as  
149 controls. We assigned cut-off values to define miRNA hits based on CD44 and CD24 cell  
150 integrated intensity. The raw screening data and quantitation of each phenotypic criterion are  
151 shown in Figure 2D. This strategy revealed that the miR-106a-3p shifts primary cells into a  
152 CD44<sup>high</sup>/CD24<sup>low</sup> phenotype. This miRNA is a paralogue of the miR-17/92 cluster (Figure  
153 2E). Next, to further confirm the results, we performed a secondary screen of the whole  
154 family cluster (Figure 2F). Twenty-eight miRNAs belonging to the cluster were retested, in  
155 triplicate, using the same method as in the primary screen (Figure 2C). A total of 4 miRNA  
156 hits were scored with Z-factor > 2 (Figure 2E) and prompted a shift in the CD44<sup>high</sup>/CD24<sup>low</sup>  
157 population (Figure S1A). The top hit was miR-106a-3p (Figure 2F). We then confirmed that  
158 miR-106a-3p induced a CD44<sup>high</sup>/CD24<sup>low</sup> phenotype using flow cytometry based on the  
159 expression of CD44 and CD24 (Figure 2G). In cells expressing the control mimic, the  
160 CD44<sup>high</sup>/CD24<sup>low</sup> phenotype was ~10% of the total cell population (Figure 2G). Conversely,  
161 we observed a 5-fold increase of CD44<sup>high</sup>/CD24<sup>low</sup> phenotype, reaching ~50% of the total cell  
162 population, in cells transfected with a miR106a-3p mimic (Figure 2G). Thus, mir-106a-3p

163 directly promotes the “transdifferentiation” of CD44<sup>low</sup>/CD24<sup>high</sup> cell phenotype into  
164 CD44<sup>high</sup>/CD24<sup>low</sup> cell phenotype.

165 In parallel, to correlate these data with the generation of stem-like cells in organoids,  
166 we assessed the frequency of organoid-initiation after transfection with each of the 28  
167 miRNAs (miR-17/92 cluster) (Figure 2E). Out of 7 positive hits (Figure 2H), miR-106a-3p  
168 transfection enabled the highest organoid-initiating frequency (Figure 2H). Taken together,  
169 these results show that miR-106a-3p transfection (Figure 2I) is the only one that induces the  
170 two properties of 1) CD44<sup>high</sup>/CD24<sup>low</sup> cells enrichment in the population and 2) organoid  
171 initiation enhancement.

### 172 *miR-106a-3p drives the generation of human organoids*

173 To further study miR-106a-3p function, we generated retroviral vectors of miR-106a  
174 as previously described<sup>24</sup> and evaluated its stable expression in HMECs (Figure 3 A-B). First,  
175 we examined the expression of miR-106a-5p and miR-106a-3p using RT-qPCR in control  
176 (miR-Vector) and miR-106a-infected cells (Figure 3A). We observed that miR-106a-5p was  
177 expressed in both infected cells, whereas miR-106a-3p was exclusively expressed in miR-  
178 106a infected cells, both by RT-qPCR and *in situ* hybridization (Figure 3A-B).

179 To further evaluate the impact of miR-106a on organoid architecture, organoids were  
180 analyzed using confocal microscopy. Apoptotic cells are present in organoids during lumen  
181 development of the mammary gland.<sup>1</sup> Immunofluorescence staining for the apoptosis marker,  
182 Caspase-3, showed that miR-106a did not impact luminal apoptosis during organogenesis  
183 (Figure 3C, Caspase-3). Moreover, organoids are characterized by a well-defined  
184 cell/Matrigel interface with a myoepithelial layer, which was not impacted by miR-106a  
185 overexpression (Figure 3C, CD44 and p63). In addition, organoids expressed  $\beta$ -catenin (a  
186 cadherin-based cell–cell junctions marker) and miR-106a overexpression did not show any  
187 effect on its localization and did not disrupt cell junctions (Figure 3C,  $\beta$ -catenin). These  
188 results show that miR-106a does not target the morphogenesis of organoids.

189 As expected, miR-106a stable overexpression in primary HMECs also greatly  
190 increased organoid-initiating frequency (Figure 3D). Next, to analyze miR-106a-3p and miR-  
191 106a-5p individual functions on organoid-initiating cells, miR-106a-3p or miR-106a-5p  
192 mimics were transfected into HMECs (Figure 3E). Overexpression of miR-106a-3p  
193 significantly increases organoids number by about 5-fold compared to control and miR-106a-

194 5p (Figure 3E). Our results indicate that miR-106a-5p does not impact the number of  
195 organoid-forming cells, demonstrating the specific requirement of miR-106a-3p for  
196 maintaining organoid-initiating cells (Figure 3E). Then, miR-106a stably transfected cells  
197 were transfected with LNA-anti-miR-106a-3p or LNA-control, allowing us to confirm that  
198 miR-106a-3p is required for organoid initiation (Figure 3F). Next, flow cytometry was used to  
199 evaluate the expression of CD44 and CD24 in miR-infected HMECs; 89.5% control HMECs  
200 (infected with the miR vector) presented a CD44<sup>high</sup>/CD24<sup>high</sup> phenotype and 1.7% a  
201 CD44<sup>high</sup>/CD24<sup>low</sup> phenotype (Figure 3G, left panel); in contrast, ~49.2% HMECs infected  
202 with miR-106a presented the in CD44<sup>high</sup>/CD24<sup>low</sup> phenotype (Figure 3G, right panel).

203 To further elucidate the expression of miR-106a-3p in the different CD44/CD24 cell  
204 subpopulations, we generated CBX7-transfected HMECs because CBX7 is essential for the  
205 maintenance not only of ESCs<sup>35, 36</sup> but also of several aSC types.<sup>37, 38, 39</sup> CBX7-transfected  
206 HMECs presented enrichment in CD44<sup>high</sup>/CD24<sup>low</sup> cells as compared to empty vector-  
207 transfected HMECs (Figure 4A-B). We then separated by flow cytometry CD44<sup>high</sup>/CD24<sup>low</sup>  
208 (green) from CD44<sup>high</sup>/CD24<sup>high</sup> cell populations (blue) to analyze the role of the endogenous  
209 expression of miR-106a-3p. The CD44<sup>high</sup>/CD24<sup>low</sup> population was the only one to present an  
210 endogenous expression of miR-106a-3p (Figure 4C). Blocking the endogenous expression of  
211 miR-106a-3p with LNA-anti-miR-106a-3p or LNA-control (Figure 4D) impacted organoids  
212 generation (Figure 4E-F). From these experiments, we can conclude 1) that the increased  
213 CD44<sup>high</sup>/CD24<sup>low</sup> phenotype in miR-106a-3p expressing cells is causative for the higher  
214 organoid number, 2) that miR-106a-3p promotes the CD44<sup>high</sup>/CD24<sup>low</sup> phenotype and 3) that  
215 miR-106a-3p is required for organoids generation and thus participates in aSC-like lineage  
216 maintenance.

### 217 ***miR-106a-3p an actor of cell plasticity for differentiation***

218 We then performed transcriptomic analyses to determine whether the miR-106a-3p  
219 impacts on cell plasticity to maintain adult stem-like cells or some intermediate cellular states.  
220 To study the effect of miR-106a-3p on global gene expression patterns, we isolated total  
221 RNAs from miR-106a-3p-transfected HMECs and performed a microarray analysis using  
222 Affymetrix chips (HG-U133 Plus 2.0). miR-106a-3p transfection induced significant changes  
223 in the expression of 1348 genes when compared to controls (Figure 5A). To gather more  
224 insights regarding the global pattern of transcriptional changes associated with miR-106a-3p,  
225 we compared our entire microarray dataset with already defined gene signatures of interest by



226 performing gene set enrichment analysis (GSEA). We observed an enrichment in a  
227 downregulated gene set involved in stem cell differentiation (Figure 5B). To explore the  
228 physiological role of miR-106a-3p in stem cell differentiation, we took advantage of the  
229 ability of human embryonic stem cells (hESCs) to differentiate more readily than aSCs. First,  
230 we evaluated the miR-106-3p endogenous expression profile in hESCs (Figure 5C). The  
231 expression of miR-106a-5p, miR-106a-3p as well as miR-302b (expressed most abundantly in  
232 slowly-growing hESCs)<sup>40</sup> was detectable in hESCs (Figure 5C). Since hESCs are pluripotent  
233 stem cells derived from blastocysts and have the property to proliferate indefinitely *in vitro*  
234 while maintaining the capacity to differentiate into derivatives of all three germ layers:  
235 ectoderm, mesoderm and endoderm,<sup>41</sup> we used hESC to derive early stages of endoderm,  
236 mesoderm and ectoderm (Figure 5D). hESCs were transfected with LNA-anti-miR-106a-3p  
237 (anti-miR106a-3p) or LNA-control (anti-miR-ctl) prior to endoderm (Figure 5E), mesoderm  
238 (Figure 5F) and ectoderm (Figure 5G) differentiation. We then applied classical protocols<sup>42</sup> to  
239 trigger directed differentiation of the three germ layers and determine whether blocking  
240 endogenous miR-106a-3p expression could change transcriptional expression level of *OCT4*,  
241 *SOX2* and *NANOG*. In anti-miR106a-3p transfected cells, *SOX2* expression decreased during  
242 endoderm, mesoderm and ectoderm differentiation (Figure 5H, I, and J), while *OCT4*  
243 expression decreased during endoderm and ectoderm differentiation (Figure 5H and J).  
244 Conversely, *NANOG* expression increased during mesoderm differentiation (Figure 5I). These  
245 data demonstrate that miR-106a-3p is involved in the early cell differentiation process into the  
246 three germ layers.

247 Given that *OCT4*, *SOX2* and *NANOG* expression are markers of hESC, we  
248 hypothesized that aSCs derived from organoids might also express these genes. In addition, to  
249 determine whether these three genes play a role in organoid initiation, we knocked down them  
250 individually and demonstrated that the three genes participate, individually, in the organoids  
251 generation (Figure 6A), suggesting that they are also related to organoid development. Next,  
252 in order to determine whether these genes were induced during organoids differentiation, their  
253 mRNA expressions were measured over time in organoid cultures (Figure 6B). Development  
254 of organoids can be separated into two stages: an early, highly proliferative stage in which  
255 single cells begin to form organoids (approximately the six first days of culture) followed by  
256 proliferation arrest, starting around day 8.<sup>43</sup> The expression of the three core regulator genes  
257 increased as a function of time, reaching a peak at day 6; then *OCT4* and *SOX2* decreased to  
258 low levels whereas *NANOG* remained at a high level (Figure 6B). Finally, to test whether

259 miR-106a-3p could contribute to modulate the transcriptional activity of these three core  
260 transcription factors, we assessed their mRNA (Figure 6C) and protein (Figure 6D-F) levels in  
261 miR-106a-3p expressing cells and control cells. All three genes were induced in miR-106a-  
262 3p-overexpressing cells as compared to control cells, both at the transcriptional (Figure 6C)  
263 and post-transcriptional levels (Figure 6D-F). We thus demonstrated the link between miR-  
264 106a-3p and *OCT4*, *SOX2* and *NANOG* expression levels and thus, confirming the specific  
265 role of miR-106a-3p via the expression of these transcription factors in organoid initiation.  
266 These results also suggest that organoids contain reminiscent properties of embryonic-like  
267 stem cells.

### 268 ***Identification of miR-106a-3p targets by in silico research and transcriptomic analysis***

269 In the last part of this study, we sought to identify the genes and mechanisms by which  
270 miR-106a-3p enhances organoids generation. To establish whether the significant expression  
271 changes observed upon miR-106a-3p transfection (1,348 differential expressed (DE) genes,  
272 see materials and methods) was overlapping with the data obtained from prediction  
273 algorithms, we used the computational tool MicroT\_CDS and identified 707 genes as  
274 predicted targets of the hsa-miR-106a-3p. Both datasets were intersected, resulting in a  
275 number of 144 common genes (Figure 6G). Subsequently, the 144 genes-functional  
276 enrichment analysis using REACTOME pathways and Gene Ontology for these 144 genes  
277 was used to identify 32 hub genes, and generate an expression heatmap to investigate the  
278 expression patterns in the microarray sample (see materials and methods). Based on these  
279 analyses, 32 hub genes related with miR-106a-3p were detected (Figure 6H), 30 genes being  
280 down-regulated and 2 up-regulated. Among the 30 upregulated genes, we identified 4 genes  
281 encoding transcription factors (*REST*, *CBFB*, *NFYA*, and *GATA3*), which were screened in a  
282 subsequent analysis (Figure 6I-M). Transcript levels of these 4 putative targets were  
283 quantified by RT-qPCR in the miR-106a-3p-transfected cells; each transcript showed a  
284 statistically significant decrease after miR-106a-3p transfection (Figure 6I). Next, we  
285 monitored the expression of the set of 4 transcription factors during organoid development  
286 (Figure 6J-M); the expression of *REST* (Figure 6J), *CBFB* (Figure 6K) and *NFYA* (Figure 6L)  
287 strongly decreased after 4 days of organoid development whereas *GATA3* expression showed  
288 moderate changes (Figure 6M).

289 We then next screened for the relevance of these 3 putative targets by measuring 1) the  
290 impact on *OCT4*, *SOX2* and *NANOG* mRNA expression (Figure 7B,E and H), and 2) the

291 organoid-initiating frequency (Figure 7C, F and I). We hypothesized that the siRNA-mediated  
292 individual knock-down of the three genes differentially regulated during organoid  
293 development, *REST*, *CBFB*, and *NFYA*, would impact the expressions of *OCT4*, *SOX2* and  
294 *NANOG*, and thus restore the organoid-generating frequency observed after miR-106a-3p  
295 transfection. We observed that *REST* knock-down (Figure 7A) was accompanied by an  
296 increase in the expression of *OCT4* (Figure 7B), whereas *NFYA* knock-down (Figure 7D)  
297 induced an increase in *OCT4* and *SOX2* expressions (Figure 7E), and the knock-down of  
298 *CBFB* (Figure 7G) an increase in *NANOG* expression and a moderate decrease in *SOX2*  
299 expression (Figure 7H). We also showed that the knock-down of these three genes was able to  
300 restore organoid formation, thus mimicking the effect of miR-106a-3p overexpression (Figure  
301 7C, F and I).

302

## 303 **Discussion**

304 Organoids are very powerful self-organizing cellular systems that can grow in 3D  
305 from human adult or pluripotent stem cells. Organoids possess the exciting potential of  
306 modeling key aspects of human development and disease processes, enabling advances  
307 towards precision medicine and human disease modeling. Pivotal for the success of organoid  
308 cultures is the understanding of signaling pathways that control lineage specification in  
309 tissues. Although it can be argued that identifying the stem cells is not critical for the culture  
310 of primary tissues, the understanding of the stem cell niche is essential for the improvement of  
311 tissue-specific organoid growth conditions as well as the maintenance and indefinite  
312 propagation of organoid cultures. We thus aimed at uncovering the key factors that are  
313 essential in promoting aSC-derived organoids. This involves first the identification and  
314 characterization of the organoid-initiating cell populations, and then the analysis of the  
315 regulation of the transcriptional processes involved in organoid generation. A more complete  
316 understanding of the development of organoids would enhance their relevance as models to  
317 study organ morphology, function and disease, and would open new avenues for drug  
318 development and regenerative medicine.

319 Herein, we focused on miRNAs as privileged factors able to regulate organoid  
320 generation and maintenance. We used an unbiased screening procedure which led us to the  
321 identification of the previously uncharacterized miR-106a-3p as a master regulator of the stem  
322 cell-like lineage which specifies the organoid-initiating cell population from human normal  
323 mammary epithelial cells. Collectively, in the experimental conditions investigated, aSC-  
324 derived organoids are controlled by the expression of a single miRNA, miR-106a-3p. In a  
325 number of deep sequencing studies, co-existence of 5p/3p pairs has been demonstrated in  
326 about half of the miRNA populations analyzed and the relative concentrations of the 5p/3p  
327 species may be comparable or extensively variable.<sup>44, 45</sup> Notably, the minor miRNA species,  
328 be they 5p or 3p, are evolutionarily conserved in the seed sequences, which plays in favor of  
329 biological high significance.<sup>46, 47, 48</sup> miR-106a-3p had been reported in literature to be  
330 expressed and to play a role in follicular lymphoma,<sup>49</sup> gastric cancer,<sup>50</sup> and renal carcinoma,<sup>51</sup>  
331 confirming thus the biological importance of this miRNA. Mir-106a-3p has also been reported  
332 in literature to be expressed and play a role in follicular lymphoma<sup>49</sup>, gastric cancer<sup>50</sup> and in  
333 renal carcinoma<sup>51</sup>; thus confirming the biological significance of this miRNA.

334 For a cell to differentiate and adopt the identity of a specific cell lineage,  
335 transcriptional mechanisms, a series of specific genes must be switched on whereas others  
336 must be switched off. To date, it was not known whether a transcriptional program existed for  
337 establishing the adult stem cell maintenance. aSC identity, plasticity, and homeostasis are  
338 precisely orchestrated by lineage-restricted epigenetic and transcriptional regulatory networks.  
339 Therefore, by coupling gene array to miRNA/siRNA screening approaches, we further  
340 investigated the transcriptional mechanisms which specify the organoid-initiating cell  
341 population from human primary cells expressing miR-106a-3p. Gene expression profiling  
342 demonstrated that 3 related transcription factors that are target genes of miR-106a-3p (*CBFB*,  
343 *REST* and *NF-YA*) govern the generation of organoid-initiating cells and thus maintain stem  
344 cell self-renewal properties (Figure 7J). Interestingly, knocking down each of these 3 genes  
345 phenocopied the effects of the miR-106a-3p overexpression by modulating both the three core  
346 transcription factors (OCT4, SOX2 and NANOG) and the organoid initiating cell population.

347 *REST* is a transcription factor which has been previously reported to be expressed in  
348 epithelial cells,<sup>52</sup> and to be part of the OCT4/SOX2/NANOG transcriptional network.<sup>53</sup>  
349 Indeed, REST shares a significant number of target genes with OCT4, SOX2 and NANOG,  
350 and several of these genes encode essential factors for cell maintenance in ESCs.<sup>53</sup> It binds a  
351 21-bp DNA recognition sequence and has two repressor domains that recruit corepressor  
352 complexes. REST binding sites in ESCs overlap with genomic regions that carry Polycomb-  
353 repressed chromatin in FACS-purified multipotent progenitors of the early embryonic  
354 pancreas.<sup>54</sup> Herein, REST also restrains differentiation into breast progenitors to favor aSCs  
355 maintenance in breast epithelial cells.

356 Core binding factor (CBF) is a heterodimeric transcription factor complex composed  
357 of a DNA-binding subunit, one of three runt-related transcription factor (RUNX) factors, and  
358 a non-DNA binding subunit, CBFB.<sup>55, 56</sup> There is only one CBFB subunit while the other  
359 subunit is encoded by three mammalian genes: *RUNX1*, *RUNX2*, and *RUNX3* which all  
360 require CBFB for their function. The targeted inactivation of CBFB abrogates the activity of  
361 all RUNX complexes.<sup>57</sup> Targeted knock-out of RUNX genes has revealed distinct roles for  
362 these proteins in development, RUNX1 being required for hematopoiesis,<sup>58</sup> RUNX2 being  
363 required for osteogenesis,<sup>59</sup> and RUNX3 for neurogenesis and the control of gastric epithelial  
364 cell proliferation.<sup>60, 61</sup> The RUNX/CBFB complexes have been shown to play a role function  
365 in the maintenance of stem cells by activating FGF signaling loops between the epithelium

366 and mesenchyme.<sup>57</sup> Therefore, it is not surprising that controlling CFBF through miR-106a-  
367 3p expression participates in the aSC maintenance.

368

369 NF-Y, a ubiquitously expressed trimeric transcription factor, has a dual role as  
370 activator and repressor of transcription.<sup>62, 62</sup>. The heterodimer protein complex comprises three  
371 subunits (NF-YA, NF-YB, and NF-YC). NF-YA is considered as the limiting regulatory  
372 subunit of the trimer, since it is required for the complex assembly and sequence-specific  
373 DNA binding. NF-Y has previously been identified as the marker of CSCs in hepatocellular  
374 carcinoma and embryonic carcinoma cells.<sup>63, 64, 65</sup> In addition, it has been shown to regulate  
375 the expression of several human *SOX* genes, including *SOX2*.<sup>66</sup> NF-Y has been shown to  
376 regulate the expression of several human *SOX* genes, including *SOX2*<sup>66</sup>, *SOX9*<sup>67</sup>, and  
377 *SOX18*<sup>68</sup>. This transcriptional activation function of NF-Y is mediated, at least in part, by  
378 direct binding to CCAAT boxes within promoters of target genes and by making complex  
379 interplay with other factors involved in transcriptional regulation of human *SOX* genes. It has  
380 also been shown that the NF-Y binding site CCAAT within the proximal region of the human  
381 *SOX2* gene promoter plays a key role in regulating *SOX2* expression in cervical CSCs,  
382 establishing that NF-YA is essential for the maintenance of characteristics of CSCs.  
383 Interestingly, NF-Y has been shown to regulate ATF6 expression<sup>69</sup> which is involved in  
384 protein homeostasis. Recently it has been proposed that cell proteostasis restrains protein  
385 synthesis for maintenance of stem cells<sup>70</sup> thus, we could speculate that NF-YA might also  
386 participate in stem cell maintenance through the regulation of cell proteostasis. Herein, we  
387 found that NFYA regulates the expression of *SOX2* for the maintenance of breast aSCs,  
388 consistent with the literature.

389 Mechanistically, miR-106a-3p targets a specific set of genes, namely *CBFB*, *REST* and  
390 *NFYA* to regulate, *in fine*, *OCT4*, *SOX2* and *NANOG* expressions, therefore reducing  
391 heterogeneity within the organoid-initiating cell population and favoring organogenesis  
392 (Figure 7J). Thus, a complex mechanism is clearly in place in order to finely tune the  
393 expression of miR-106a-3p both in organoids and upon differentiation, which is conserved  
394 throughout development in adult and embryonic stem cells. Recent reports showed that  
395 differentiation of human aSCs<sup>27</sup> and mouse ESCs<sup>22</sup> are modulated through post-transcriptional  
396 attenuation of key factors such as *OCT4*, *SOX2* and *NANOG*. It has been speculated that the  
397 same set of transcription factors plays an important role in the maintenance of multipotency

398 and self-renewal of aSCs. A recent study by Doffou, has also reported a similar phenomenon,  
399 showing that OCT4 expression is induced, starting at day 6, in an organoid hepatocyte  
400 model.<sup>71</sup> This induction is seen in hepatocytes in anticipation of trans-differentiation. This  
401 increase of OCT4 could be attributed to differentiation in our model, based on previous  
402 studies showing that both under- and over-expression of OCT4 could lead to cell  
403 differentiation.<sup>72</sup>

404 miRNA-directed regulations provide a way to finely tune aSCs self-renewal and  
405 differentiation. Indeed, miRNAs play an important role in gene regulation for ESCs  
406 pluripotency, self-renewal and differentiation. These miRNAs can be divided into two  
407 subgroups: pluripotency- miRNAs and pro-differentiation miRNAs. The first subgroup,  
408 including miR-137, miR-184, miR-200, miR-290, miR-302 and miR-9, is exclusively  
409 expressed in the pluripotent state and rapidly decreases upon differentiation stimuli.<sup>9</sup> By  
410 contrast, pro-differentiation miRNAs, such as let-7, miR-296, miR-134 and miR-470, regulate  
411 the differentiation processes in pluripotent cells.<sup>1</sup> These miRNAs are upregulated during  
412 ESCs differentiation and inhibit the expression of pluripotency factors, including NANOG  
413 and SOX2.<sup>1</sup> Our data show that miR-106a-3p features as a self-renewal miRNA participating  
414 in the modulation of the core factor network (OCT4, SOX2 and NANOG) in aSCs, which in  
415 turn inhibits differentiation and favors maintenance (Figure 7J). Indeed, miR-106a-3p is  
416 sufficient by itself in targeting a specific set of genes *CBFB*, *REST* and *NF-YA*, to induce  
417 expression of OCT4, SOX2 and NANOG. Finally, the role of the miR-106a-3p is of particular  
418 interest in explaining how mammary epithelial cells acquire stem cell-like properties in  
419 normal conditions. Indeed, the capacity of miR-106a-3p to promote stem cell-like behavior  
420 gives us some clues on how the stem cell status may be specified in mammary cells. Our work  
421 highlights the transcription factor network cooperativity for the establishment of stem cell  
422 identity and lineage commitment, and provides comprehensive regulatory principles for  
423 human epithelial homeostasis. To date, it was not known whether a transcriptional program  
424 existed for establishing the aSC maintenance, and this is what we demonstrate in this study  
425 (Figure 7J). Deciphering signaling cascades that control organoid development would  
426 enhance their relevance as models to study organ function, disease and therapy.

427

428

429

430

431 **Acknowledgments**

432 We gratefully acknowledge the members from ARTiSt group for their critical remarks. FD  
433 was supported by grants from the “Ligue Contre le Cancer Gironde” and from the “Site de  
434 recherche intégrée sur le cancer de Bordeaux” (SIRIC Brio). This work has been supported by  
435 grants from the “Région Nouvelle-Aquitaine” (DF).

436

437

438



439

440 **Author Contributions**

441 Conceptualization, D.F., F.D., G.L, and A.C; Methodology, D.F., F.D., and M.P.;  
442 Investigation, D.F., F.D., E.V, and M.P.; Writing – Original Draft, D.F.; Writing – Review &  
443 Editing, D.F., F.D., J.R., E.V and M.P; Resources, D.F. and M.P.; Supervision, D.F., and  
444 M.P.

445

446

447

448 **Declaration of Interests**

449 None

450

## 451 **Materials and Methods**

### 452 **Contact for reagent and resource sharing**

453 Further information and requests for resources and reagents may be directed to and will be  
454 fulfilled by the Lead Contact, Delphine Fessart ([delphine.fessart@inserm.fr](mailto:delphine.fessart@inserm.fr)).

455

### 456 **Experimental model details**

#### 457 *Cell lines*

458 Normal HMECs with finite life-span have been previously fully described.<sup>23, 34</sup> HUES cells  
459 (HUES9) were cultured as previously described.<sup>42</sup>

#### 460 *Cell culture*

461 HMECs cells at Passage 6 (P6) were used for the miRNA screening and follow-up miRNA  
462 studies, unless otherwise stated. For three-dimensional culture (3D) organoids, cells were  
463 grown in laminin-rich basement membrane growth factor-reduced Matrigel (BDBiosciences)  
464 (Matrigel) as we previously described.<sup>5</sup>

## 465 **Methods**

### 466 *High-content miRNA screening*

467 The miRNA screen was performed in triplicate, using the Human pre-miR miRNA library  
468 (Ambion), consisting of 837 miRNAs, together with control small interfering RNAs (siRNAs)  
469 targeting Cyclophilin B (Dharmacon), CD44, and CD24 (Qiagen). HMECs at P6 were  
470 reverse-transfected with 30 nM miRNA in 384-well format using HiperFect (QIAGEN), in  
471 triplicate using Janus apparatus (Perkin Elmer) of the POETIC platform. Plates were  
472 incubated for 46 h, medium was changed and fixed/stained 72 h later with CD44-FITC  
473 conjugated antibody (Abcam), CD24 antibody (BD Biosciences) and Gt $\alpha$ Mo AlexaFluor546  
474 (Invitrogen), 4',6-diamidino-2-phenylindole (DAPI, Sigma). High-content images were  
475 acquired with the Cytation3 (Biotek) at 4 $\times$  magnification, and analysis was performed using  
476 the Analysis software (Biotek). The Z-factor provides a metric of the median absolute  
477 deviation by which an individual miRNA transfected condition (averaged over three  
478 replicates) differs from the population median (median percentage CD44<sup>high</sup>/CD24<sup>low</sup>  
479 population).

480 *Flow cytometry*

481 Following trypsinization, cells were strained through a 40  $\mu$ M nylon mesh to ensure single  
482 cells are obtained and suspended in ice-cold solution to obtain a density of  $1 \times 10^6$  cells/ml.  
483 Antibodies (CD44 conjugated with FITC; CD24 conjugated with phycoerythrin, PE) were  
484 added to the cell suspension at concentrations suggested by the manufacturer and cells were  
485 incubated at 4°C in the dark for 45 min. These labeled cells were washed twice, suspended in  
486 PBS and analyzed using a flow cytometer (Becton Dickinson). The cells were stained with  
487 either isotype-matched control antibodies or with no primary antibody as negative controls.  
488 No difference was observed between these two controls.

489

490 *RNA isolation and miRNA microarray*

491 Total RNAs were isolated from three independent samples of HMEC-transfected cells using  
492 the miRNeasy Kit (Qiagen) according to the manufacturer's instructions. The quantity and  
493 size of RNAs were analyzed for concentration, purity and integrity by using  
494 spectrophotometric methods in combination with the Agilent Bioanalyzer (Agilent  
495 Technologies).

496 Microarray analyses were performed on 3 independent replicates of mimic control transfected  
497 cell samples (control), 3 independent replicates of miR-106a-3p transfected cell samples.

498 Complete gene expression analysis was performed with R (R version 3.6.1)/Bioconductor  
499 software (<https://doi.org/10.1038/nmeth.3252>). Initially, the raw data were imported with  
500 oligo R package (1.48.0) (<https://doi.org/doi:10.18129/B9.bioc.oligo>) and processed  
501 (background subtraction, quantile normalization and summarization with median polish  
502 method) using the RMA algorithm (<https://doi.org/10.1093/biostatistics/4.2.249>). In addition,  
503 for the annotation process, the R packages affycoretools (1.56.0) and hgu133plus2.db (3.2.3)  
504 were used to map probe sets to gene symbols  
505 (<https://doi.org/doi:10.18129/B9.bioc.affycoretools>). Next, after the removal of control  
506 features, a non-specific intensity filtering procedure was applied to remove probesets that  
507 were not expressed at least in one of the two conditions (control or transfected samples).  
508 Finally, aiming to identify differentially expressed genes between the transfected and non-  
509 transfected samples, linear models were fitted and statistical inference was estimated using the  
510 limma R package (3.40.6) (<https://doi.org/10.1093/nar/gkv007>). Differentially expressed  
511 genes were identified using an FDR value  $< 0.01$  & an absolute value of  $\log_2$ - fold change  $>$

512 log<sub>2</sub>(1.5). Regarding the visualization part of the differential expression analysis, volcano  
513 plots were created with the EnhancedVolcano R package (1.2.0)  
514 (<https://doi.org/doi:10.18129/B9.bioc.EnhancedVolcano>), whereas the R package  
515 ComplexHeatmap (2.0.0) was utilized for the creation of the gene expression heatmaps based  
516 on selected gene signatures (<https://doi.org/10.1093/bioinformatics/btw313>). The gene  
517 expression data have been deposited in the ArrayExpress database at EMBL-EBI  
518 ([www.ebi.ac.uk/arrayexpress](http://www.ebi.ac.uk/arrayexpress)) under accession number E-MTAB-6594. The R code  
519 implemented for the analysis is available upon request.

#### 520 *Functional enrichment analysis*

521 To exploit the biological mechanisms involved in the miR-106a-3p transfection effect, the  
522 BioInfoMiner interpretation web platform was used (10.4018/IJMSTR.2016040103;  
523 <https://doi.org/10.15252/emmm.201707929>). BioInfoMiner implements an automated and  
524 robust network analysis of functional terms, by the integration of semantic information  
525 through different biomedical vocabularies, aiming to elucidate the significantly perturbed  
526 biological processes, and critical genes with centrality role affected in the studied phenotype  
527 (<https://doi.org/10.1038/s41467-022-30159-0>). Furthermore, in order to unravel if specific  
528 mechanisms related to stemness and differentiation are significantly altered in the transfected  
529 samples, a customized enrichment analysis approach was applied through rotation gene set  
530 tests (<https://doi.org/10.1093/bioinformatics/btq401>), using the limma R package (mroast  
531 function). For the gene set signatures, we initially selected from the Molecular Signatures  
532 Database (<https://www.gsea-msigdb.org/gsea/msigdb/>),  
533 (<https://doi.org/10.1073/pnas.0506580102>) the ontology and curated gene sets (version 7.1).  
534 Then, as a final step we kept only the terms/pathways that included the phrases “STEM” or  
535 “NOTCH” and had at least 10 genes in the respective signature. Enrichment analysis was  
536 performed using REACTOME pathways (<https://doi.org/10.1093/nar/gkab1028>) and Gene  
537 Ontology (<https://doi.org/10.1093/nar/gkaa1113>) to identify 32 hub genes, and generate an  
538 expression heatmap to investigate the expression patterns in the microarray sample.

539

540

#### 541 *miRNA target identification*

542 The miRNA targets predictions based on miRanda, DianaMT, miRDB and miRWalk were  
543 downloaded from [www.microrna.org](http://www.microrna.org) (August 2010 release), [http://zmf.umm.uni-](http://zmf.umm.uni-heidelberg.de/apps/zmf/mirwalk2/)  
544 [heidelberg.de/apps/zmf/mirwalk2/](http://zmf.umm.uni-heidelberg.de/apps/zmf/mirwalk2/) and from <http://mirdb.org/miRDB/>. We used the  
545 computational tool MicroT\_CDS (<https://doi.org/10.1093/nar/gkt393>)

#### 546 *miRNA target stem cells signature analysis*

547 Gene set stem cells enrichment analysis for predicted miRNA targets was carried out using  
548 the web interface of Stem checker (<http://stemchecker.sysbiolab.eu/>) using default settings.

#### 549 *miRNA and antigomiR transfections*

550 HMECs were transfected with 30 nM miRNA or 30 nM antigomiR (anti-miRNA) in 384-well  
551 plates using HiperFect (Qiagen), and the protocol described above for ‘High-content miRNA  
552 Screening’ was followed. For siRNA transfections, pools of three siRNA per target were  
553 purchased (Qiagen) and the cell were transfected with Hyperfect (Qiagen) according to  
554 manufacturer instructions.

#### 555 *Quantitative reverse transcriptase-polymerase chain reaction*

556 Methodology for quantitative reverse transcriptase-polymerase chain reaction (RT-qPCR) has  
557 been described previously <sup>6</sup>. Quantitative RT-PCR reactions were performed with SYBR  
558 Green Master Mix (ABI). For siRNA knockdown experiments, three siRNA per targets were  
559 used and, RNA was extracted from  $1 \times 10^5$  cells 48 hr post-transfection. *GAPDH* levels were  
560 quantified for each cDNA sample in separate qPCR reactions and were used as an  
561 endogenous control. Target gene-expression levels were quantified using target specific  
562 probes. Values were normalized to the internal *GAPDH* control and expressed relative to  
563 *siGLO* transfected control levels (100%). All qPCR reactions were run in triplicate from three  
564 independent samples. Primers used for qPCR are in Supp. Table 1.

#### 565 *Retroviral stable cell lines*

566 106a-5p/-3p miRNA hit was cloned into MirVec as previously described <sup>3</sup>. After sequence  
567 verification, 5 mg of plasmid DNA was transfected into HMEC P5 was transduced into  
568 Phoenix packaging cells using Fugene (Roche, Basel, Switzerland). Viral supernatant was  
569 harvested 48 h after transfection. Target HMECs were seeded in a six-well plate at a density  
570 of 5000 cells/cm<sup>2</sup> and spininfected the following day at 32 °C, 350 r.p.m. for 1 h with viral

571 supernatant in the presence of 8 mg/ml polybrene. Cells were selected with blasticidin (3  
572 mg/ml). Cells were harvested for RT-qPCR analysis.

### 573 *Immunofluorescence*

574 Fixed cells were permeabilized with 0.1% Triton X-100 (Sigma) for 30 min at room  
575 temperature (RT) cells were stained for 2 h at RT with a primary antibody followed by a  
576 secondary antibody staining for 1 h at RT (AlexaFlour-488-conjugated goat anti-mouse  
577 antibody (Invitrogen). Cells were imaged on Leica Dmi8 microscope. Images were analyzed  
578 using Leica software. Primary antibodies used were Mo $\alpha$ CD44 (BD Biosciences); Rb $\alpha$ CD44  
579 (Abcam), Mo $\alpha$ CD24 (BD Biosciences), Rb $\alpha$ cleaved Caspase-3 ((Asp175), Cell Signaling),  
580 Mo $\alpha$ beta-catenin (BD Biosciences), Mo $\alpha$ p63 (clone 4A4; Santa CruzBiotechnology),  
581 cleaved-caspase 3 (Cell Signaling). Secondary antibodies were the appropriate AlexaFluor-  
582 488 or AlexaFluor-546 antibody (Invitrogen). DAPI and CellMask Deep Red (Invitrogen)  
583 were also included. Images were collected with the Dmi8 microscope (Leica) or the Zeiss 510  
584 Meta Confocal microscope (Zeiss) and Developer Software (Leica) used for image analysis.

### 585 *In situ hybridization (ISH) and microscopy*

586 ISH was performed by using specific DIG-labeled miRNA LNAprobes from Exiqon. Briefly,  
587 cells were fixed in 4% paraformaldehyde for 30 min, followed by 70% ethanol for at least 16  
588 h at 4°C. Cells were then permeabilized with 0.1% Triton X-100 for 10 min. The washed cells  
589 were then pre-hybridized with a prehybridization buffer (46 SSC, 25% formamide, 36  
590 Denhardt's solution, 2% blocking reagents, 0.25 mg/ml yeast tRNA, 0.25 mg/ml salmon  
591 sperm DNA) for 30 min at room temperature, followed by hybridization at 23 °C below the  
592 T<sub>m</sub> of the LNA probe for 2 h. The cells were subsequently washed with Washing Buffer I (46  
593 SSC with 0.1% Tween 20), II (26 SSC), and III (16 SSC) at the hybridization temperature.  
594 The cells were blocked with a signal enhancer (Lifetechnologies) for 1 h at room temperature,  
595 and then incubated with a mouse anti-DIG antibody at a dilution of 1:1000 at 4°C overnight.  
596 The cells were washed with PBS three times to remove unbounded mouse anti-DIG antibody.  
597 Then, cells were incubated with a fluorescently labeled secondary antibody. To confirm that  
598 the ISH signals were indeed from the specific hybridization of the probes with the target  
599 RNA, the cells stained with a specific miR-scramble DIG-labeled miRNA LNAprobes from  
600 Exiqon. The DNA was stained with DAPI. The samples were mounted on a fluorescent  
601 mounting medium (Dako). The images were taken with a LSM-510 Meta (Zeiss) confocal  
602 microscope.

603 *ESCs differentiation*

604 HUES cells (HUES9) were cultured as previously described<sup>42</sup>. Endoderm was induced by  
605 treating the cells for 3 days with 100 ng activin A (Peprotech, France) in DMEM  
606 supplemented with 10% FCS. Mesoderm was induced by culturing the cells in RPMI  
607 supplemented with 20% B27 (Thermofisher, France) and added with 5  $\mu$ M CHIR 99021  
608 (Stem cell, France) for 24 hr, then with BMP2 (10 ng/ml, Thermofisher, France) and 5  $\mu$ M  
609 CHIR 99021 the second day and finally IWR1 2  $\mu$ M and BMP2 (10 ng/ml) the third day.  
610 Ectoderm was induced in RPMI supplemented with N2 medium (Thermofisher) and 0.5  $\mu$ M  
611 retinoic acid for three days.

612

613 **Quantification and statistical analyses**

614 Quantification data are presented as means  $\pm$  SEM. Statistical significance was analyzed using  
615 an unpaired Student's t test. A difference at  $p < 0.05$  was considered statistically significant.

616

617

618

619

Figure 1

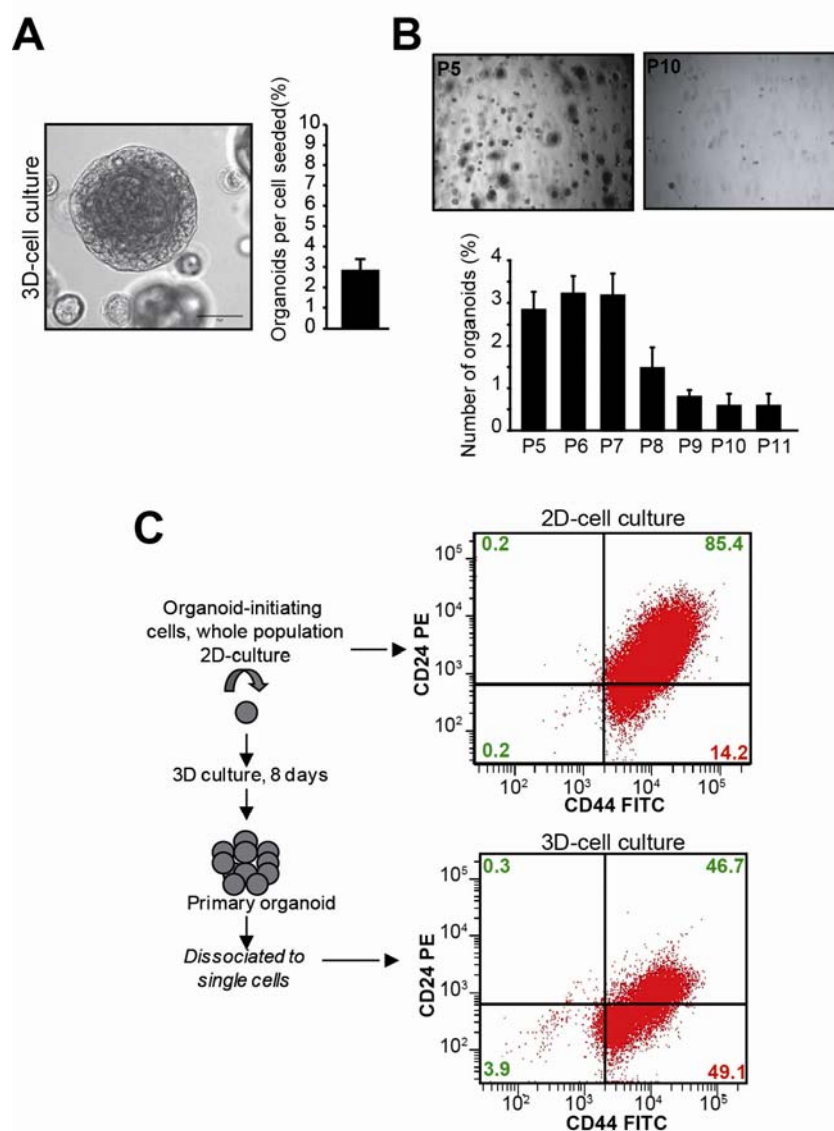

620

621 **Figure 1. 3D-culture confers original cell properties as compared to 2D-culture**

622 **A**, Morphology of organoids from HMEC cells cultivated in Matrigel. HMECs are primary  
623 cells obtained by dissociation of purified non-diseased human mammary gland. Brightfield  
624 microscopic image of one organoid, bar length 50  $\mu$ m. The bar graph shows the mean of  
625 organoids per cell seeded (mean  $\pm$  SEM) after 10 days of culture from three independent  
626 experiments. **B**, Representative brightfield pictures of organoids grown in 3D at passage 5  
627 (P5) and passage 10 (P10). The bar graph shows the mean  $\pm$  SEM of organoids per well, from  
628 passage P5 to passage P11. Data are from three independent experiments for each passage. **C**,  
629 Flow cytometric analyses of CD44/CD24 in HMEC cells derived from 2D-cell culture (top)



630 or from primary organoids culture in 3D (bottom). The expression of CD44<sup>high</sup>/CD24<sup>low</sup> in  
631 dissociated organoids was higher than in 2D cultured cells. A minimum of 10,000 events were  
632 collected per sample.

633

Figure 2

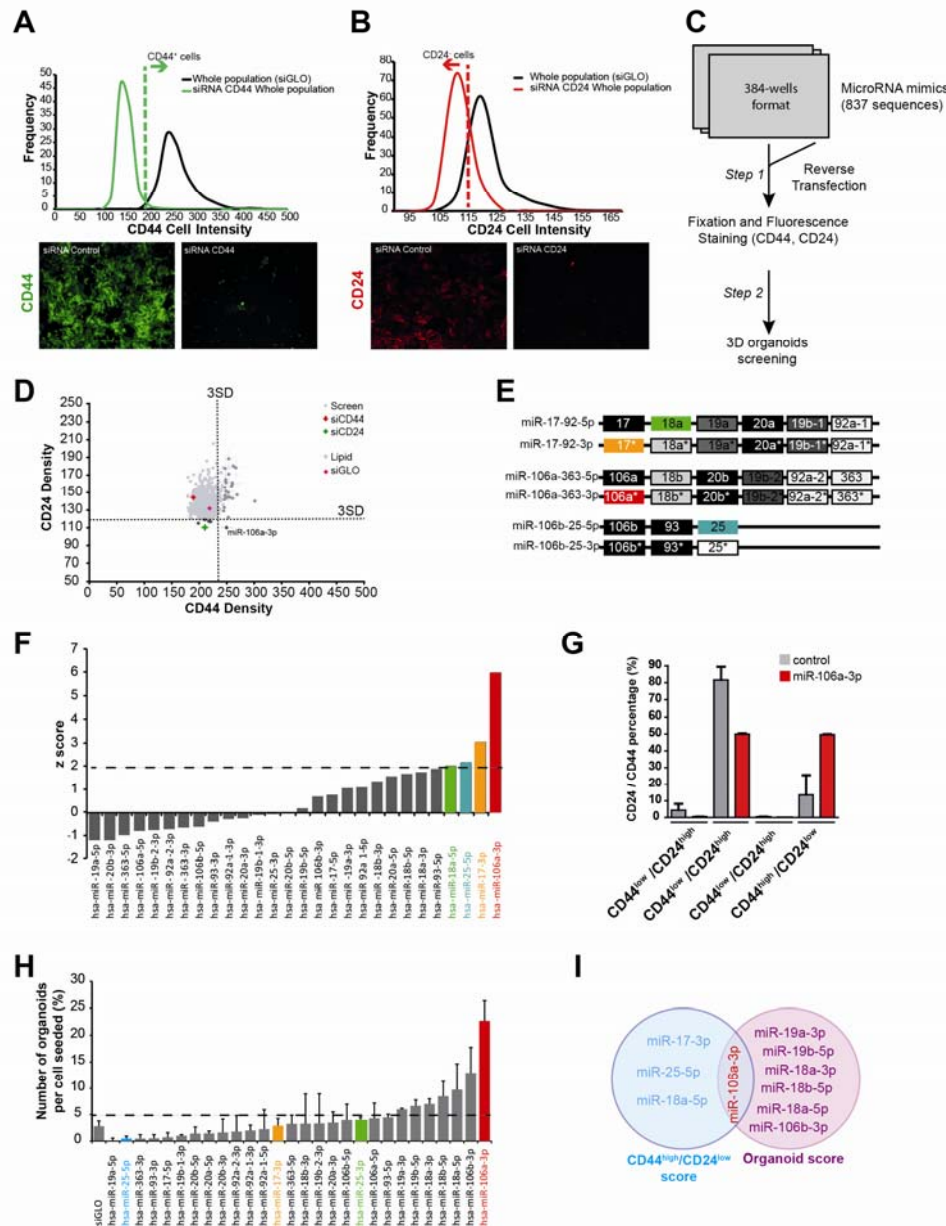

634

635

636 **Figure 2. Identification of miR-106a-3p as the predominant miRNA in cells growing in**  
 637 **3D**

638 **A**, Frequency distributions of CD44 intensity in HMECs at P6 (whole population, siGLO) as  
 639 compared to HMEC-CD44-siRNA-depleted cells. Bottom panels are representative  
 640 immunofluorescence pictures of HMECs stained with CD44 antibody (green): siGLO (left)  
 641 and CD44 siRNA-knocked-down cells (right). **B**, Frequency distributions of CD24 intensity  
 642 in HMECs at P6 (whole population, siGLO) as compared to HMEC CD24 siRNA knock  
 643 down. Bottom panels are representative immunofluorescence pictures of HMECs stained  
 644 with CD24 antibody (red): siGLO (left) and CD24 siRNA-knocked-down cells. **C**, Workflow for

645 image-based miRNA screening for CD44<sup>high</sup>/CD24<sup>low</sup> enhancers in primary human HMECs.  
646 HMECs were plated in 384-well plates and subjected to HTS of the miRNA libraries using  
647 optimized immunofluorescence staining for CD44 and CD24. **D**, Screening dot-plot showing  
648 the relationship between CD44 and CD24 intensities. Based on the frequency distributions  
649 generated for each phenotypic criterion (CD44 and CD24 intensity levels), we assigned highly  
650 stringent cutoffs for scoring positive hits in the genome-wide screen (dashed lines, 3 standard  
651 deviations (3SD) from the siGLO negative control. **E**, Members of the miR-17/92 cluster and  
652 its two paralogues miR-106a/363 and miR-106b/25. Red: miR-106a-3p; blue: miR-25-5p;  
653 green: miR-18-5p; orange: miR-17-3p. **F**, HMECs were transfected with miRNA mimics of  
654 the miR-17/92 cluster and its two paralogues and screened using conditions identical to the  
655 full screen. Z-Scores were calculated for individual miRNA mimics and plotted according to  
656 rank order. Dashed lines indicate 2 standard deviations (2SD) above the mean of the  
657 distribution. In colors are the miRNA above the 2SD. **G**, Mean percentages  $\pm$  SEM of  
658 CD44/CD24 subpopulations from at least three independent sorting experiments in HMEC  
659 transfected with miR-106a-3p mimic as compared to control. **H**, Mean numbers of organoids  
660 per cell seeded for each miRNA transfected in HMECs as compared to cells transfected with  
661 siRNA control (siGLO). **I**, Venn diagram depicting the overlap of miRNA scoring in common  
662 between the CD44<sup>high</sup>/CD24<sup>low</sup> and organoid scores. Note that the overall number of miRNAs  
663 in common would be the overlap of the intersect of these two Venn diagrams.

664

Figure 3

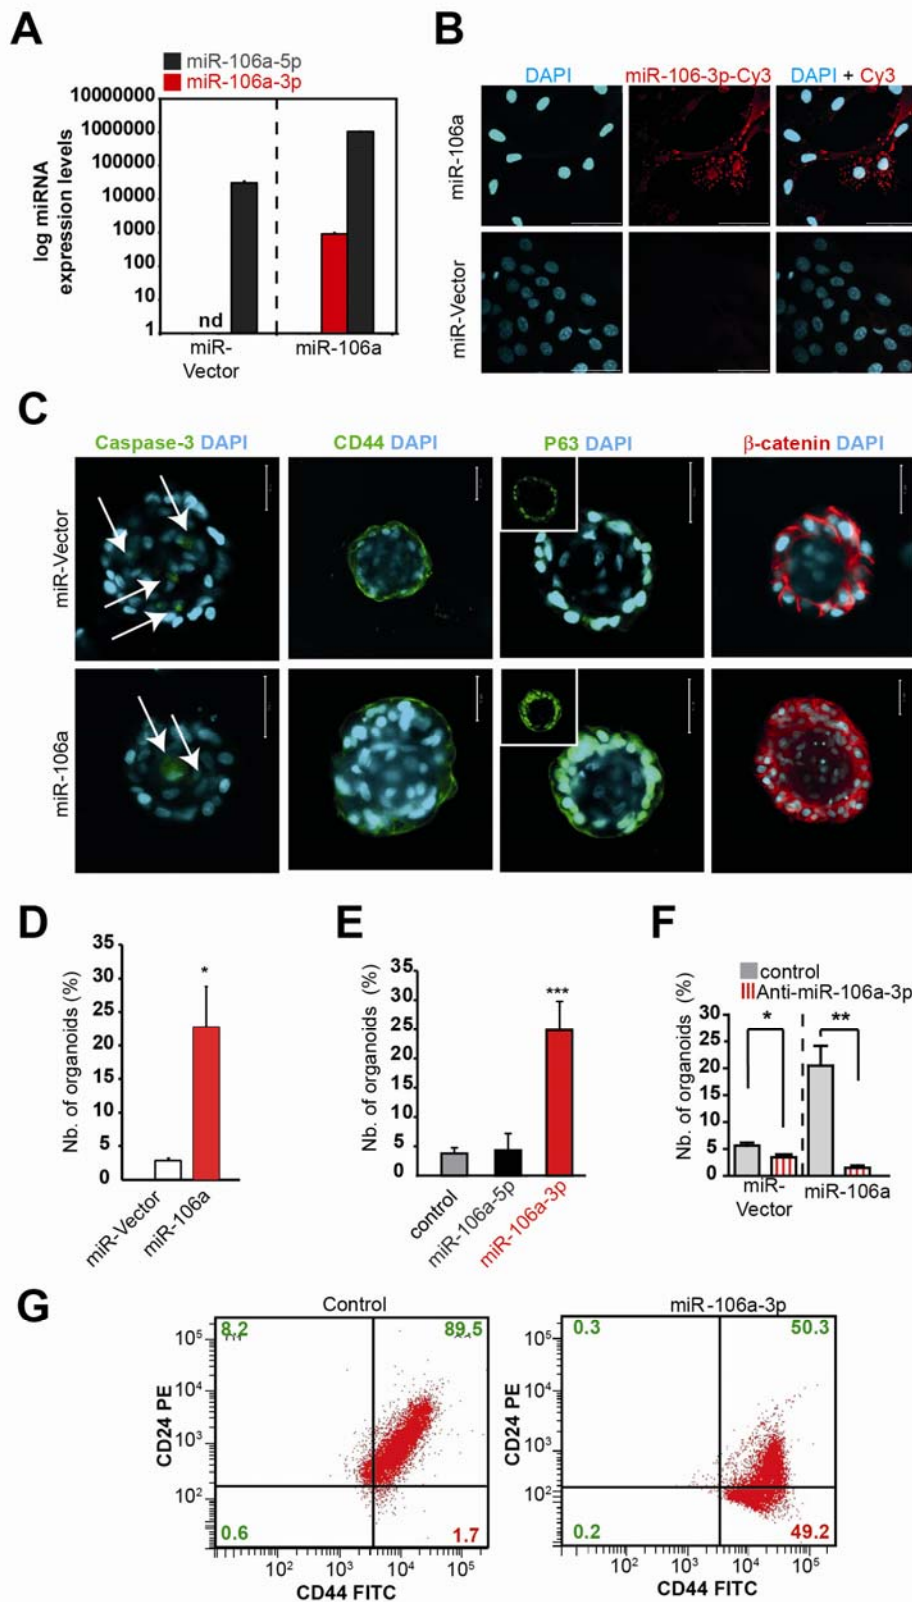

666 **Figure 3. Properties of miR-106a-3p**

667 **A**, Relative miR-106a-3p and miR-106a-5p expression levels determined by RT-qPCR in  
668 HMECs after retroviral infection with miR-Vector or miR-106a. n.d., not detectable. **B**, FISH  
669 detection of miR-106a-3p in HMEC-miR106a stable cell lines. miR-106a-3p positive signals  
670 are visualized in red. Scale bar: 50  $\mu$ m. **C**, Confocal cross-sections of stable HMEC-miR106a  
671 organoids as compared to miR-Vector organoids stained with respectively active Caspase-3,  
672 CD44, p63 or  $\beta$ -catenin, and DAPI (blue) for nucleus. The arrows indicate apoptotic cells.  
673 Scale bars, 50  $\mu$ m. **D**, The bar graphs show the mean number of organoids per well for miR-  
674 106a stable HMECs as compared to cells with miR-Vector. Statistical significance by  
675 Student's t test is indicated by one ( $p < 0.05$ ), two ( $p < 0.01$ ), or three ( $p < 0.001$ ) asterisks. **E**,  
676 Mean number of organoids per well in HMEC transfected with either control, miR106a-5p or  
677 miR106a-3p mimics. **F**, Percentage of organoids formed by cells seeded for either stable miR-  
678 vector transfected with anti-miR control or stable miR-106a-HMEC transfected with anti-  
679 miR106a-3p. Statistical significance by Student's t test is indicated by one ( $p < 0.05$ ), two ( $p$   
680  $< 0.01$ ), or three ( $p < 0.001$ ) asterisks. **G**, Flow cytometric analyses of CD44/CD24 in HMEC  
681 transfected with either control or miR106a-3p mimics. A minimum of 10,000 events were  
682 collected per sample.

683

684

Figure 4

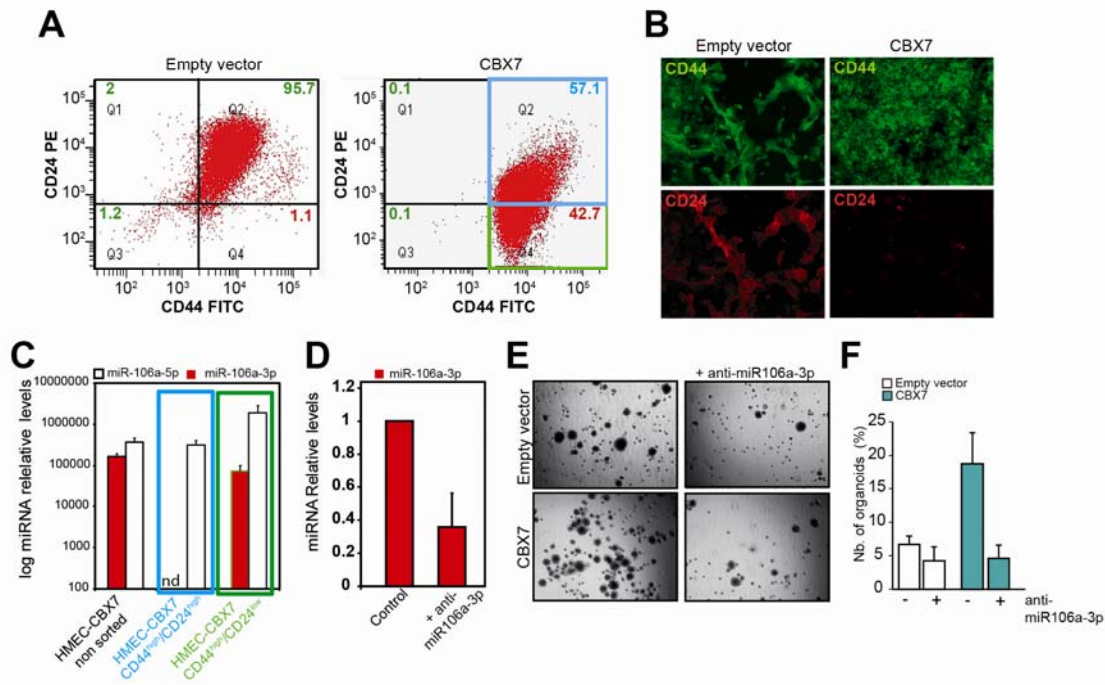

685

686 **Figure 4. miR-106a-3p improves the maintenance of organoid-initiating cells**

687 **A**, Flow cytometric analyses of CD44/CD24 in stable HMEC- vector as compared to HMEC-  
 688 CBX7. A minimum of 10,000 events were collected per sample. **B**, Representative  
 689 immunofluorescence pictures of HMEC- control (empty vector) and HMEC-CBX7 stained  
 690 with CD44 antibody (green) and CD24 antibody (red). **C**, Subpopulations of  
 691 CD44<sup>high</sup>/CD24<sup>low</sup> (green) and CD44<sup>high</sup>/CD24<sup>high</sup> (blue) were sorted using a flow cytometer;  
 692 the relative miR-106a-3p and miR-106a-5p expression levels were determined by RT-qPCR  
 693 for each subpopulation. **D**, Relative miR-106a-3p expression levels determined by RT-qPCR  
 694 in stable cell lines obtained by retroviral infection of HMECs with empty-Vector or CBX7. **E**,  
 695 Representative brightfield pictures of organoids grown in 3D in qPCR in stable cell lines  
 696 obtained by retroviral infection of HMECs with empty-Vector or CBX7 transfected with an  
 697 anti-miR-106a-3p mimic. **F**, Percentage of organoids formed HMEC-empty vector as  
 698 compared to HMEC-CBX-7 in presence or not of anti-miR-106a-3p mimic.

699

700

701

Figure 5

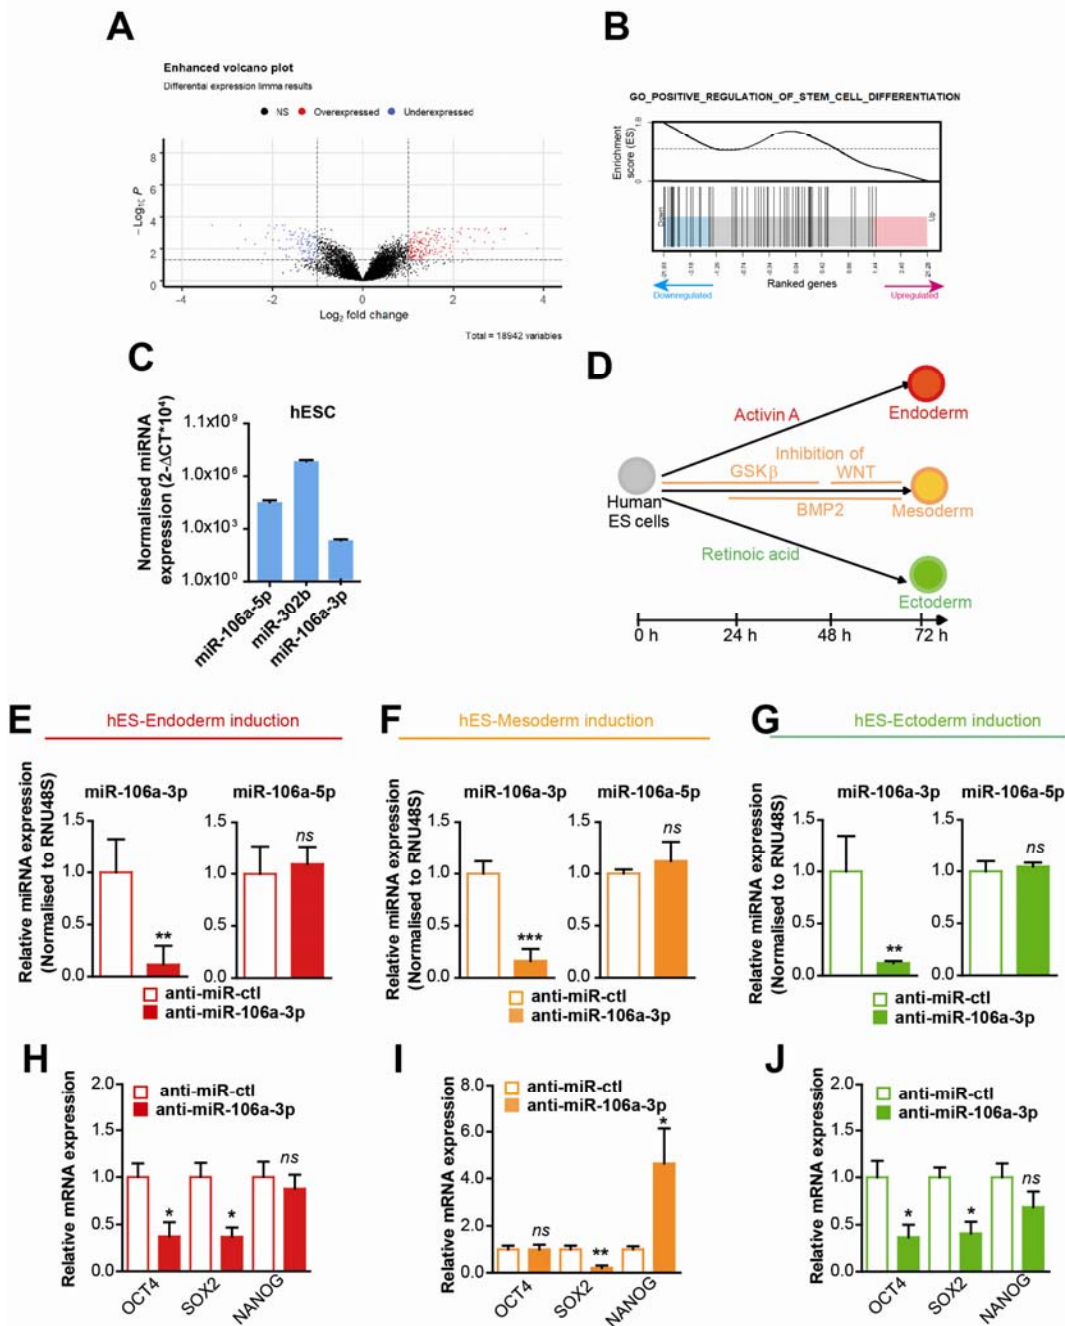

702

703 **Figure 5. miR-106a-3p targets involved in downregulation of stem cell differentiation**

704 **A**, Volcano plot comparing the gene expression fold changes and p-values between HMECs  
 705 transfected with control mimic or miR106a-3p, using the R package EnhancedVolcano. The  
 706 plot shows the distribution of the total number of 18,942 genes in the core gene category were  
 707 tested. Genes with fold change > 1 and FDR value < 0.05 are indicated in red, and genes with  
 708 fold change < -1 and FDR value < 0.05 are indicated in blue. **B**, Barcode enrichment plot  
 709 from the gene set enrichment analysis results, indicating down-regulation of stem cell  
 710 differentiation pathway-related genes in the miR-106-3p-transfected group. **C**, Relative miR-

711 106a-3p, miR-106a-5p and miR-302b expression levels determined by RT-qPCR in hESCs.  
712 **D**, Schematic representation of the human ES cell differentiation process, including timeline  
713 and key signaling pathways that are modulated. **E-G**, Relative miR-106a-3p and miR-106a-5p  
714 expression levels determined by RT-qPCR in hESCs cells transfected with control mimic or  
715 anti-miR-106a-3p following induction of the endoderm (E), mesoderm (F) and ectoderm (G)  
716 differentiation. **H-J**, Relative mRNA expression levels of key regulators of pluripotency in  
717 hESCs transfected with control mimic or anti-miR106a-3p following induction of endoderm  
718 (H), mesoderm (I) and ectoderm (J) differentiation. In all graphs, means and standard errors  
719 are shown, and statistical significance by Student's t test is indicated by one ( $p < 0.05$ ), two ( $p$   
720  $< 0.01$ ), or three ( $p < 0.001$ ) asterisks.

721

722

723



Figure 6

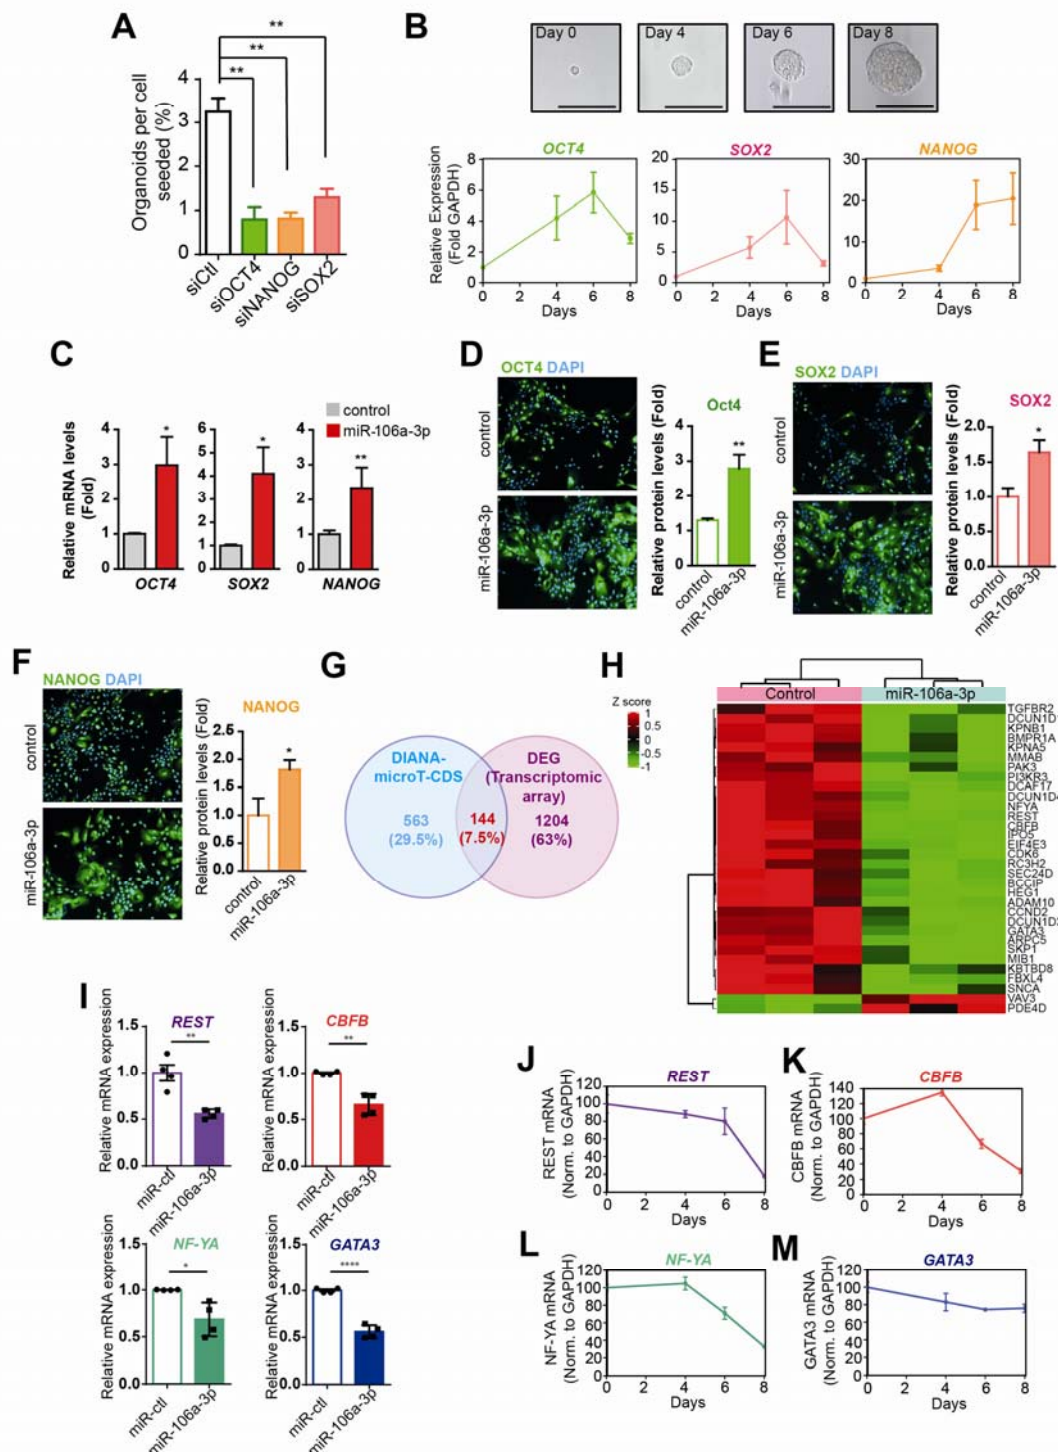

724

725 **Figure 6. miR-106a-3p, a stem cell determining regulator for organoids and**  
 726 **development**

727 **A**, Percentage of organoids per seeded cell generated from HMECs transfected with siRNA  
 728 control, siRNA-OCT4, siRNA-NANOG or siRNA-SOX2. **B**, Relative *OCT4*, *SOX2* and  
 729 *NANOG* expression levels determined by RT-qPCR in 3D growth of HMECs at Days 0, 4, 6,

33

730 and 8. **C**, Relative *OCT4*, *SOX2* and *NANOG* expression levels (measured by RT-qPCR and  
731 normalized to *RNA48*) following miR-106a-infected HMECs transfection with LNA-control  
732 (grey) or LNA- miR-106a-3p (red). In all graphs, means and standard errors are shown, and  
733 statistical significance by Student's t test is indicated by one ( $p < 0.05$ ), two ( $p < 0.01$ ), or  
734 three ( $p < 0.001$ ) asterisks. **D-F**, Relative protein expression levels of *OCT4* (**D**), *SOX2* (**E**)  
735 and *NANOG* (**F**) determined by immunofluorescence analysis. **G**, Venn diagram depicting the  
736 overlap of differentially expressed genes in the microarray experiment (1348 genes), with the  
737 predicted targets of the hsa-miR-106a-3p using the computational tool MicroT\_CDS  
738 ([http://diana.imis.athena-innovation.gr/DianaTools/index.php?r=MicroT\\_CDS/index](http://diana.imis.athena-innovation.gr/DianaTools/index.php?r=MicroT_CDS/index)) (707  
739 genes), resulting in a number of 144 common genes. **H**, Heatmap of the 32 hub genes,  
740 resulted from the union of the REACTOME and GO biological processes, using the R  
741 package ComplexHeatmap **I**, *REST*, *CBFB*, *NFYA* and *GATA3* mRNA expression levels  
742 (measured by RT-qPCR and normalized to *RNA48*) following miR-106a-infected HMECs  
743 transfection with LNA-control (miR-ctl) or LNA-miR-106a-3p. **J-M**, Relative *REST* (**J**),  
744 *CBFB* (**K**), *NFYA* (**L**) and *GATA3* (**M**) expression levels determined by RT-qPCR in 3D  
745 growth of HMECs at Days 0, 4, 6, and 8.

746

747

748

## Figure 7

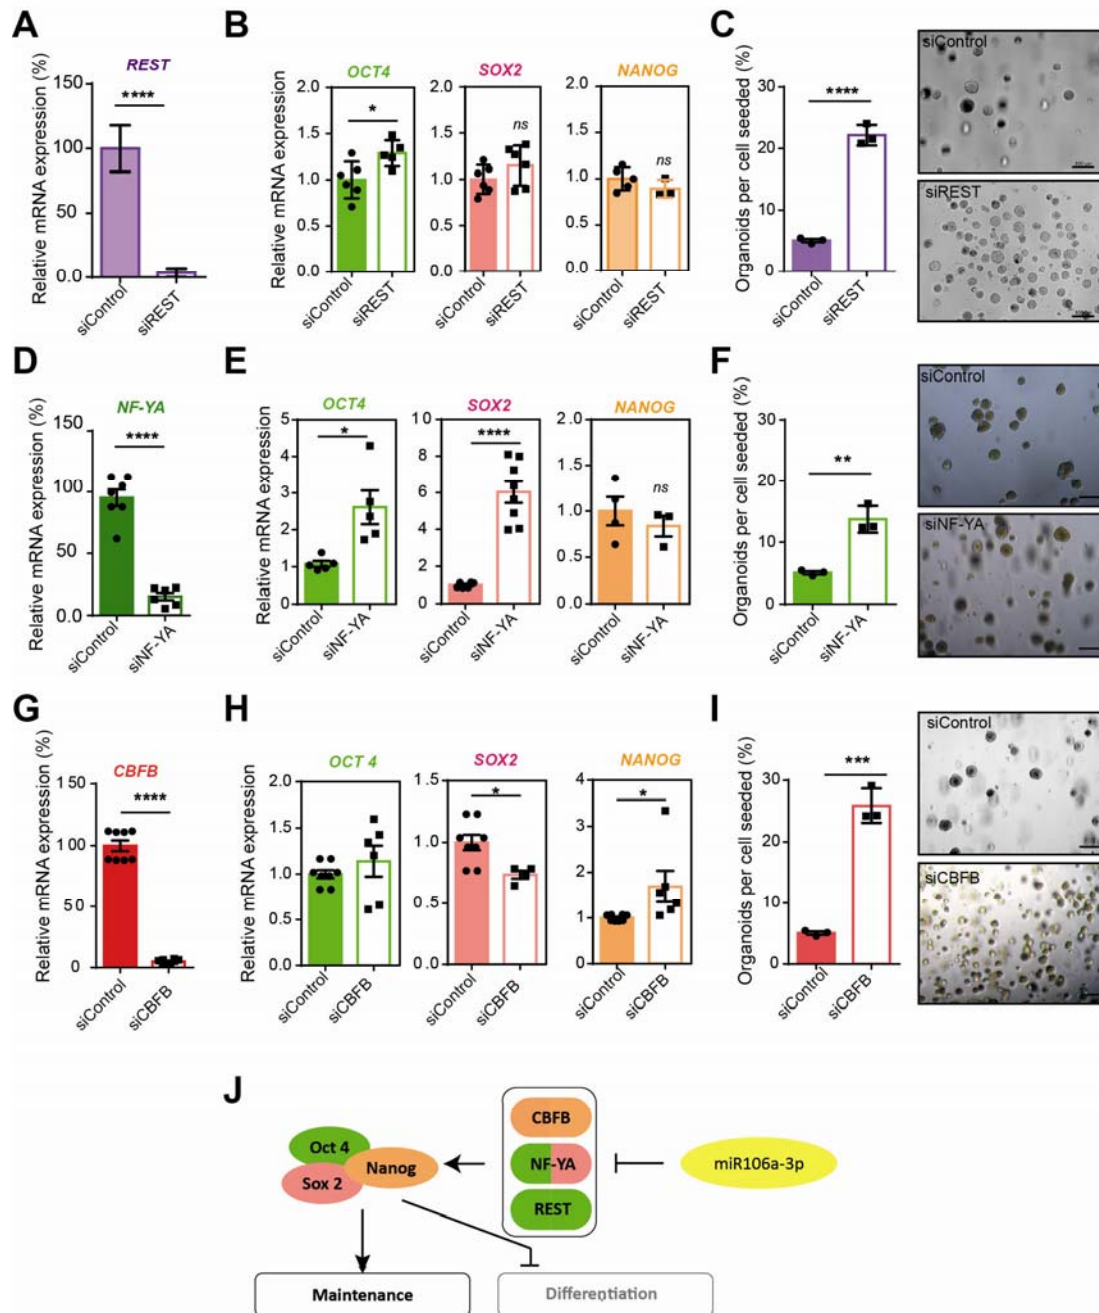

749

750 **Figure 7. miR-106a-3p a barrier for cell differentiation program during mammary**  
 751 **organoid initiation.** **A**, Efficiency of *REST* gene silencing with specific human siRNA in  
 752 transfected HMECs, as determined by RT-qPCR. Means and standard errors are shown. **B**,  
 753 Impact of *REST* silencing (siREST) on *OCT4*, *SOX2* and *NANOG* gene expression as  
 754 determined by RT-qPCR. **C**, Percentage of organoids formed by seeded for control-  
 755 transfected HMECs (siRNA-ctl) as compared to siREST-transfected HMECs. Representative

756 brightfield pictures of organoids formed from control- and si-REST-transfected HMECs. **D**,  
757 Efficiency of *NFYA* gene silencing with specific human siRNA in transfected HMECs as  
758 determined by RT-qPCR. Means and standard errors are shown. **E**, Impact of *NFYA* silencing  
759 (siNF-YA) on *OCT4*, *SOX2* and *NANOG* gene expression as determined by RT-qPCR. **F**,  
760 Percentage of organoids formed by seeded for control-transfected HMECs (siRNA-ctl) as  
761 compared to siNFYA-transfected HMECs. Representative brightfield pictures of organoids  
762 formed from control- and siNFYA-transfected HMECs. **G**, Efficiency of *CBFB* gene  
763 silencing with specific human siRNA in transfected HMECs as determined by RT-qPCR.  
764 Means and standard errors are shown. **H**, Impact of *CBFB* silencing (siCBFB) on *OCT4*,  
765 *SOX2* and *NANOG* gene expression as determined by RT-qPCR. **I**, Percentage of organoids  
766 formed by seeded for control-transfected HMECs (siRNA-ctl) as compared to siCBFB-  
767 transfected HMECs. Representative brightfield pictures of organoids formed from HMECs  
768 control- and siCBFB-transfected HMECs. **J**, Schematic representation of the mechanism of  
769 organogenesis initiated by miR-106a-3p. miR-106a-3p acts on 3 main transcription factors  
770 CBFB, NF-YA and REST. These transcription factors regulate the expression of OCT4,  
771 SOX2 and NANOG, which in turns favors stem cell maintenance and block cell  
772 differentiation.

773

Supp. Figure 1

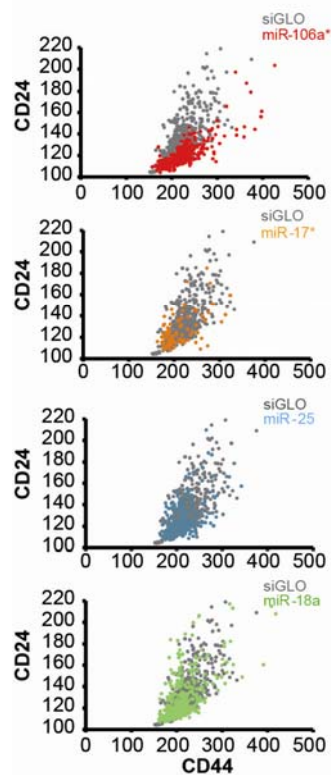

774

775 **Figure S1**

776 Scatter plots of CD44/CD24 intensity in normal HMEC transfected with miR-106a-3p (red);  
777 miR-17-3p (orange); miR-25-5p (blue); and miR-18-5p (green).

778

779

780

781 **Table S1** List of the primer sequences used in the study.

| <b>Gene Name</b> | <b>Sequences</b>          |
|------------------|---------------------------|
| <i>CBFB-F</i>    | CCCGACCAGAGAAGCAAGTT      |
| <i>CBFB-R</i>    | GCCACAAAAGCGATTTCCGA      |
| <i>NFYA-F</i>    | CAGCAATAGTTCGACAGAGCAGA   |
| <i>NFYA-R</i>    | CTACCTGGAGGGTCTGGACTTG    |
| <i>REST-F</i>    | GGAGGAAACATTTAAGAAACCATTT |
| <i>REST-R</i>    | CATGGCGGGTACTTCATGT       |
| <i>GAPDH-F</i>   | CCTGGTATGACAACGAATTT      |
| <i>GAPDH-R</i>   | GTGAGGGTCTCTCTTCCT        |
| <i>OCT3/4-F</i>  | TTCAGCCAAACGACCATCTG      |
| <i>OCT3/4-R</i>  | CACGAGGGTTTCTGCTTTGC      |
| <i>SOX2-F</i>    | CCCACCTACAGCATGTCCTACTC   |
| <i>SOX2-R</i>    | TGGAGTGGGAGGAAGAGGTAAC    |
| <i>NANOG-F</i>   | TTCCCTCCTCCATGGATCTG      |
| <i>NANOG-R</i>   | TGTTTCTTGACTGGGACCTTGTC   |

782

783

## 784 References

- 785 1. Fessart D, Begueret H, Delom F. Three-dimensional culture model to distinguish normal from  
786 malignant human bronchial epithelial cells. *The European respiratory journal* **42**, 1345-1356  
787 (2013).
- 788  
789 2. Fessart D, *et al.* Secretion of protein disulphide isomerase AGR2 confers tumorigenic  
790 properties. *eLife* **5**, (2016).
- 791  
792 3. Schwarz JS, de Jonge HR, Forrest JN, Jr. Value of Organoids from Comparative Epithelia  
793 Models. *The Yale journal of biology and medicine* **88**, 367-374 (2015).
- 794  
795 4. Zeineddine D, *et al.* Oct-3/4 dose dependently regulates specification of embryonic stem cells  
796 toward a cardiac lineage and early heart development. *Developmental cell* **11**, 535-546  
797 (2006).
- 798  
799 5. Mani SA, *et al.* The epithelial-mesenchymal transition generates cells with properties of stem  
800 cells. *Cell* **133**, 704-715 (2008).
- 801  
802 6. Pardal R, Clarke MF, Morrison SJ. Applying the principles of stem-cell biology to cancer.  
803 *Nature reviews Cancer* **3**, 895-902 (2003).
- 804  
805 7. Kim SY, *et al.* Role of the IL-6-JAK1-STAT3-Oct-4 pathway in the conversion of non-stem  
806 cancer cells into cancer stem-like cells. *Cellular signalling* **25**, 961-969 (2013).
- 807  
808 8. Zhao D, *et al.* VEGF drives cancer-initiating stem cells through VEGFR-2/Stat3 signaling to  
809 upregulate Myc and Sox2. *Oncogene* **34**, 3107-3119 (2015).
- 810  
811 9. Lu CS, *et al.* Chemotherapeutics-induced Oct4 expression contributes to drug resistance and  
812 tumor recurrence in bladder cancer. *Oncotarget* **8**, 30844-30858 (2017).
- 813  
814 10. Wang XQ, *et al.* Octamer 4 (Oct4) mediates chemotherapeutic drug resistance in liver cancer  
815 cells through a potential Oct4-AKT-ATP-binding cassette G2 pathway. *Hepatology* **52**, 528-  
816 539 (2010).
- 817  
818 11. Loh YH, Ng JH, Ng HH. Molecular framework underlying pluripotency. *Cell cycle* **7**, 885-891  
819 (2008).
- 820  
821 12. Hall J, *et al.* Oct4 and LIF/Stat3 additively induce Kruppel factors to sustain embryonic stem  
822 cell self-renewal. *Cell stem cell* **5**, 597-609 (2009).

823

- 824 13. Tai MH, Chang CC, Kiupel M, Webster JD, Olson LK, Trosko JE. Oct4 expression in adult  
825 human stem cells: evidence in support of the stem cell theory of carcinogenesis.  
826 *Carcinogenesis* **26**, 495-502 (2005).
- 827
- 828 14. Schoenhals M, Kassambara A, De Vos J, Hose D, Moreaux J, Klein B. Embryonic stem cell  
829 markers expression in cancers. *Biochemical and biophysical research communications* **383**,  
830 157-162 (2009).
- 831
- 832 15. Ezeh UI, Turek PJ, Reijo RA, Clark AT. Human embryonic stem cell genes OCT4, NANOG,  
833 STELLAR, and GDF3 are expressed in both seminoma and breast carcinoma. *Cancer* **104**,  
834 2255-2265 (2005).
- 835
- 836 16. Jin T, Branch DR, Zhang X, Qi S, Youngson B, Goss PE. Examination of POU homeobox gene  
837 expression in human breast cancer cells. *International journal of cancer* **81**, 104-112 (1999).
- 838
- 839 17. Chambers I, *et al.* Functional expression cloning of Nanog, a pluripotency sustaining factor in  
840 embryonic stem cells. *Cell* **113**, 643-655 (2003).
- 841
- 842 18. Mathieu J, Ruohola-Baker H. Regulation of stem cell populations by microRNAs. *Advances in*  
843 *experimental medicine and biology* **786**, 329-351 (2013).
- 844
- 845 19. Stefani G, Slack FJ. Small non-coding RNAs in animal development. *Nature reviews Molecular*  
846 *cell biology* **9**, 219-230 (2008).
- 847
- 848 20. Taylor-Papadimitriou J, *et al.* Keratin expression in human mammary epithelial cells cultured  
849 from normal and malignant tissue: relation to in vivo phenotypes and influence of medium.  
850 *Journal of cell science* **94 ( Pt 3)**, 403-413 (1989).
- 851
- 852 21. Stampfer MR, Yaswen P. Culture models of human mammary epithelial cell transformation.  
853 *Journal of mammary gland biology and neoplasia* **5**, 365-378 (2000).
- 854
- 855 22. Labarge MA, Garbe JC, Stampfer MR. Processing of human reduction mammoplasty and  
856 mastectomy tissues for cell culture. *Journal of visualized experiments : JoVE*, (2013).
- 857
- 858 23. Garbe JC, *et al.* Molecular distinctions between stasis and telomere attrition senescence  
859 barriers shown by long-term culture of normal human mammary epithelial cells. *Cancer*  
860 *research* **69**, 7557-7568 (2009).
- 861
- 862 24. Manuel Iglesias J, *et al.* Mammosphere formation in breast carcinoma cell lines depends  
863 upon expression of E-cadherin. *PloS one* **8**, e77281 (2013).
- 864



- 865 25. Ghebeh H, *et al.* Profiling of normal and malignant breast tissue show CD44<sup>high</sup>/CD24<sup>low</sup>  
866 phenotype as a predominant stem/progenitor marker when used in combination with Ep-  
867 CAM/CD49f markers. *BMC cancer* **13**, 289 (2013).
- 868
- 869 26. Al-Hajj M, Wicha MS, Benito-Hernandez A, Morrison SJ, Clarke MF. Prospective identification  
870 of tumorigenic breast cancer cells. *Proceedings of the National Academy of Sciences of the*  
871 *United States of America* **100**, 3983-3988 (2003).
- 872
- 873 27. Sleeman KE, Kendrick H, Ashworth A, Isacke CM, Smalley MJ. CD24 staining of mouse  
874 mammary gland cells defines luminal epithelial, myoepithelial/basal and non-epithelial cells.  
875 *Breast cancer research : BCR* **8**, R7 (2006).
- 876
- 877 28. Cordenonsi M, *et al.* The Hippo transducer TAZ confers cancer stem cell-related traits on  
878 breast cancer cells. *Cell* **147**, 759-772 (2011).
- 879
- 880 29. Dontu G, *et al.* In vitro propagation and transcriptional profiling of human mammary  
881 stem/progenitor cells. *Genes & development* **17**, 1253-1270 (2003).
- 882
- 883 30. Ponti D, *et al.* Isolation and in vitro propagation of tumorigenic breast cancer cells with  
884 stem/progenitor cell properties. *Cancer research* **65**, 5506-5511 (2005).
- 885
- 886 31. Wright MH, Calcagno AM, Salcido CD, Carlson MD, Ambudkar SV, Varticovski L. Brca1 breast  
887 tumors contain distinct CD44<sup>+</sup>/CD24<sup>-</sup> and CD133<sup>+</sup> cells with cancer stem cell characteristics.  
888 *Breast cancer research : BCR* **10**, R10 (2008).
- 889
- 890 32. Perrone G, *et al.* In situ identification of CD44<sup>+</sup>/CD24<sup>-</sup> cancer cells in primary human breast  
891 carcinomas. *PLoS one* **7**, e43110 (2012).
- 892
- 893 33. Wang LB, He YQ, Wu LG, Chen DM, Fan H, Jia W. [Isolation and characterization of human  
894 breast tumor stem cells]. *Xi bao yu fen zi mian yi xue za zhi = Chinese journal of cellular and*  
895 *molecular immunology* **28**, 1261-1264 (2012).
- 896
- 897 34. Bishop CL, *et al.* Primary cilium-dependent and -independent Hedgehog signaling inhibits  
898 p16<sup>(INK4A)</sup>. *Molecular cell* **40**, 533-547 (2010).
- 899
- 900 35. Morey L, *et al.* Nonoverlapping functions of the Polycomb group Cbx family of proteins in  
901 embryonic stem cells. *Cell stem cell* **10**, 47-62 (2012).
- 902
- 903 36. O'Loghlen A, *et al.* MicroRNA regulation of Cbx7 mediates a switch of Polycomb orthologs  
904 during ESC differentiation. *Cell stem cell* **10**, 33-46 (2012).
- 905

- 906 37. Gargiulo G, *et al.* In vivo RNAi screen for BMI1 targets identifies TGF-beta/BMP-ER stress  
907 pathways as key regulators of neural- and malignant glioma-stem cell homeostasis. *Cancer*  
908 *cell* **23**, 660-676 (2013).
- 909
- 910 38. Mohn F, *et al.* Lineage-specific polycomb targets and de novo DNA methylation define  
911 restriction and potential of neuronal progenitors. *Molecular cell* **30**, 755-766 (2008).
- 912
- 913 39. Klauke K, *et al.* Polycomb Cbx family members mediate the balance between haematopoietic  
914 stem cell self-renewal and differentiation. *Nature cell biology* **15**, 353-362 (2013).
- 915
- 916 40. Suh MR, *et al.* Human embryonic stem cells express a unique set of microRNAs.  
917 *Developmental biology* **270**, 488-498 (2004).
- 918
- 919 41. Wobus AM, Boheler KR. Embryonic stem cells: prospects for developmental biology and cell  
920 therapy. *Physiological reviews* **85**, 635-678 (2005).
- 921
- 922 42. Stefanovic S, Abboud N, Desilets S, Nury D, Cowan C, Puceat M. Interplay of Oct4 with Sox2  
923 and Sox17: a molecular switch from stem cell pluripotency to specifying a cardiac fate. *The*  
924 *Journal of cell biology* **186**, 665-673 (2009).
- 925
- 926 43. Debnath J, Brugge JS. Modelling glandular epithelial cancers in three-dimensional cultures.  
927 *Nature reviews Cancer* **5**, 675-688 (2005).
- 928
- 929 44. Jagadeeswaran G, *et al.* Deep sequencing of small RNA libraries reveals dynamic regulation of  
930 conserved and novel microRNAs and microRNA-stars during silkworm development. *BMC*  
931 *genomics* **11**, 52 (2010).
- 932
- 933 45. Kuchenbauer F, *et al.* Comprehensive analysis of mammalian miRNA\* species and their role  
934 in myeloid cells. *Blood* **118**, 3350-3358 (2011).
- 935
- 936 46. Griffiths-Jones S, Hui JH, Marco A, Ronshaugen M. MicroRNA evolution by arm switching.  
937 *EMBO reports* **12**, 172-177 (2011).
- 938
- 939 47. Yang JS, *et al.* Widespread regulatory activity of vertebrate microRNA\* species. *Rna* **17**, 312-  
940 326 (2011).
- 941
- 942 48. Guo L, Lu Z. The fate of miRNA\* strand through evolutionary analysis: implication for  
943 degradation as merely carrier strand or potential regulatory molecule? *PLoS one* **5**, e11387  
944 (2010).
- 945
- 946 49. Wang W, *et al.* MicroRNA profiling of follicular lymphoma identifies microRNAs related to cell  
947 proliferation and tumor response. *Haematologica* **97**, 586-594 (2012).

- 948  
949 50. Guo W, Li W, Yuan L, Mei X, Hu W. MicroRNA-106a-3p Induces Apatinib Resistance and  
950 Activates Janus-Activated Kinase 2 (JAK2)/Signal Transducer and Activator of Transcription 3  
951 (STAT3) by Targeting the SOCS System in Gastric Cancer. *Medical science monitor :  
952 international medical journal of experimental and clinical research* **25**, 10122-10128 (2019).
- 953  
954 51. Ma Y, *et al.* miR-106a\* inhibits the proliferation of renal carcinoma cells by targeting IRS-2.  
955 *Tumour biology : the journal of the International Society for Oncodevelopmental Biology and  
956 Medicine* **36**, 8389-8398 (2015).
- 957  
958 52. Westbrook TF, *et al.* SCFbeta-TRCP controls oncogenic transformation and neural  
959 differentiation through REST degradation. *Nature* **452**, 370-374 (2008).
- 960  
961 53. Johnson R, *et al.* REST regulates distinct transcriptional networks in embryonic and neural  
962 stem cells. *PLoS biology* **6**, e256 (2008).
- 963  
964 54. van Arensbergen J, *et al.* Derepression of Polycomb targets during pancreatic organogenesis  
965 allows insulin-producing beta-cells to adopt a neural gene activity program. *Genome research*  
966 **20**, 722-732 (2010).
- 967  
968 55. Speck NA, Terry S. A new transcription factor family associated with human leukemias.  
969 *Critical reviews in eukaryotic gene expression* **5**, 337-364 (1995).
- 970  
971 56. Tang L, *et al.* Crystal structure of the nuclear matrix targeting signal of the transcription  
972 factor acute myelogenous leukemia-1/polyoma enhancer-binding protein 2alphaB/core  
973 binding factor alpha2. *The Journal of biological chemistry* **274**, 33580-33586 (1999).
- 974  
975 57. Kurosaka H, *et al.* Core binding factor beta functions in the maintenance of stem cells and  
976 orchestrates continuous proliferation and differentiation in mouse incisors. *Stem cells* **29**,  
977 1792-1803 (2011).
- 978  
979 58. Gowney JD, *et al.* Loss of Runx1 perturbs adult hematopoiesis and is associated with a  
980 myeloproliferative phenotype. *Blood* **106**, 494-504 (2005).
- 981  
982 59. Ducy P, Zhang R, Geoffroy V, Ridall AL, Karsenty G. Osf2/Cbfa1: a transcriptional activator of  
983 osteoblast differentiation. *Cell* **89**, 747-754 (1997).
- 984  
985 60. Inoue K, *et al.* Runx3 controls the axonal projection of proprioceptive dorsal root ganglion  
986 neurons. *Nature neuroscience* **5**, 946-954 (2002).
- 987  
988 61. Li QL, *et al.* Causal relationship between the loss of RUNX3 expression and gastric cancer. *Cell*  
989 **109**, 113-124 (2002).

990

- 991 62. Serra E, Zemzoumi K, di Silvio A, Mantovani R, Lardans V, Dissous C. Conservation and  
992 divergence of NF-Y transcriptional activation function. *Nucleic acids research* **26**, 3800-3805  
993 (1998).
- 994  
995 63. Dai C, *et al.* Transcriptional activation of human CDCA8 gene regulated by transcription factor  
996 NF-Y in embryonic stem cells and cancer cells. *The Journal of biological chemistry* **290**, 22423-  
997 22434 (2015).
- 998  
999 64. Moeinvaziri F, Shahhoseini M. Epigenetic role of CCAAT box-binding transcription factor NF-Y  
1000 on ID gene family in human embryonic carcinoma cells. *IUBMB life* **67**, 880-887 (2015).
- 1001  
1002 65. Bungartz G, Land H, Scadden DT, Emerson SG. NF-Y is necessary for hematopoietic stem cell  
1003 proliferation and survival. *Blood* **119**, 1380-1389 (2012).
- 1004  
1005 66. Mojsin M, Topalovic V, Marjanovic Vicentic J, Stevanovic M. Transcription factor NF-Y inhibits  
1006 cell growth and decreases SOX2 expression in human embryonal carcinoma cell line NT2/D1.  
1007 *Biochemistry Biokhimiia* **80**, 202-207 (2015).
- 1008  
1009 67. Shi Z, *et al.* Context-specific role of SOX9 in NF-Y mediated gene regulation in colorectal  
1010 cancer cells. *Nucleic acids research* **43**, 6257-6269 (2015).
- 1011  
1012 68. Petrovic I, Kovacevic-Grujicic N, Stevanovic M. ZBP-89 and Sp3 down-regulate while NF-Y up-  
1013 regulates SOX18 promoter activity in HeLa cells. *Molecular biology reports* **36**, 993-1000  
1014 (2009).
- 1015  
1016 69. Li M, *et al.* ATF6 as a transcription activator of the endoplasmic reticulum stress element:  
1017 thapsigargin stress-induced changes and synergistic interactions with NF-Y and YY1.  
1018 *Molecular and cellular biology* **20**, 5096-5106 (2000).
- 1019  
1020 70. Li C, *et al.* Amino acid catabolism regulates hematopoietic stem cell proteostasis via a GCN2-  
1021 eIF2alpha axis. *Cell stem cell* **29**, 1119-1134 e1117 (2022).
- 1022  
1023 71. Doffou M, *et al.* Oct4 Is Crucial for Transdifferentiation of Hepatocytes to Biliary Epithelial  
1024 Cells in an In Vitro Organoid Culture Model. *Gene expression* **18**, 51-62 (2018).
- 1025  
1026 72. Niwa H, Miyazaki J, Smith AG. Quantitative expression of Oct-3/4 defines differentiation,  
1027 dedifferentiation or self-renewal of ES cells. *Nature genetics* **24**, 372-376 (2000).
- 1028  
1029
